# Supplementary material for: Divergent vertebral formulae shape the evolution of axial complexity in mammals
Source: PubMed Central journal article supplement (PMC9998275; doi:10.1038/s41559-023-01982-5), 2023-03-06
Supplement: 41559_2023_1982_MOESM1_ESM.pdf [file 41559_2023_1982_MOESM1_ESM.pdf]

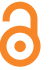

---

# Divergent vertebral formulae shape the evolution of axial complexity in mammals

---

In the format provided by the authors and unedited

**Supplementary Information**

1  
2  
3  
4  
5  
6  
7  
8  
9  
10  
11  
12  
13

**Divergent vertebral formulae shape the evolution of anatomical complexity in mammals**

Yimeng Li<sup>1</sup>, Andrew Brinkworth<sup>1</sup>, Emily Green<sup>2</sup>, Jack Oyston<sup>1</sup>, Matthew Wills<sup>1</sup> and Marcello Ruta<sup>2\*</sup>

<sup>1</sup>Milner Centre for Evolution, Department of Biology and Biochemistry, University of Bath, Claverton Down, Bath, BA2 7AY, UK.

<sup>2</sup>Joseph Banks Laboratories, Department of Life Sciences, University of Lincoln, Green Lane, Lincoln, LN6 7DL, UK.

|    |                                 |
|----|---------------------------------|
| 14 | <b>Table of Contents</b>        |
| 15 | <b>Supplementary Results</b>    |
| 16 | <b>Supplementary Discussion</b> |
| 17 | <b>Supplementary Figures</b>    |
| 18 |                                 |

## 19 Supplementary Results

20 Vertebral counts differ significantly between groups

21 Histograms of percentage distributions of TL, T, and L counts capture divergent patterns,  
22 particularly in the variable numbers of distinct modes across different groups  
23 (Supplementary Data 1). For both T and L, Chiroptera, Ferae, and Euarchonta (as well  
24 as Perissodactyla in the case of L only) reveal three dominant modes, whereas  
25 Eulipotyphla and Glires show two. Single-mode distributions for all count categories  
26 occur in Marsupialia and, to a lesser degree, in Cetartiodactyla. In Afrotheria, Xenarthra,  
27 and Cetartiodactyla, the distribution of T counts is characterized by multiple non-adjacent  
28 modes. A similar pattern features in the distribution of L counts in Afrotheria and  
29 Cetartiodactyla, except that in both groups, no discontinuities intervene between modes  
30 (Supplementary Data 1).

31

32 Changes in complexity are concentrated in younger branches

33 The TL Brillouin and evenness indices tend to increase from basal to terminal branches  
34 in most major groups (Fig. 4b, c). This pattern is exemplified by some lineages within  
35 Xenarthra (e.g., giant and long-nosed armadillos), Afrotheria (e.g., hyraxes; elephant  
36 shrews), most Eulipotyphla (solenodons represent one of the few exceptions), numerous  
37 Chiroptera (mostly evening bats), Perissodactyla (several African equids), Ferae (e.g.,  
38 felids; civets and genets; mongooses; canids; some ursids; various lineages within  
39 skunks, weasels, martens, badgers, and otters), most 'Artiodactyla' and Cetacea, as well  
40 as the majority of Primates and Glires. Interspersed with increases are also instances of  
41 decreases, both along terminal branches as well as near the roots of various subclades  
42 within various major groups. Decreases characterize Monotremata, Marsupialia  
43 (common and hairy-nosed wombats; marsupial moles), Xenarthra (hairy, fairy, and

44 banded armadillos; two- and three-toed sloths), Afrotheria (sirenians; proboscideans;  
45 golden moles), Cetacea (South American river dolphins; pygmy right whale),  
46 'Artiodactyla' (giraffids; some wild cattle; small antelopes; duikers), Primates  
47 (hominoids; howler, spider, and woolly monkeys), and Glires (pikas; Old World  
48 porcupines; beavers). The distribution of increases and decreases for the unstandardized  
49 T:L (Fig. 4d) is approximately the mirror opposite of TL evenness because for  
50 increasingly similar T and L counts, both indices approach 1.00.

51

52 TL counts correlate negatively with T:L ratios

53 In addition to the significant (albeit weak) negative correlation between TL counts and  
54 T:L ratios across the whole taxon sample (Fig. 5a; Supplementary Fig. 1; residual SE =  
55 0.2616; adjusted  $R^2 = 0.0276$ ; F-statistic = 9.188; df = 287;  $P \sim 0.0026$ ), we disentangle  
56 the contributions of each of the T and L counts to the relative size of the thoracic and  
57 lumbar domains (T:L ratios). Thus, independent contrasts analyses show T:L to be  
58 positively correlated with T (residual SE = 0.2751; adjusted  $R^2 = 0.1487$ ; F-statistic =  
59 47.81; df = 267;  $P = 3.461e-11$ ), with a loess curve marked by a steep positive slope for  
60 values of T up to 11-12 and a plateau throughout the range of the largest T counts (Fig.  
61 5b). The T:L ratios become increasingly more dispersed for  $T \geq 15$ , highlighting  
62 diverging patterns of axial elongation in groups such as Afrotheria and Xenarthra.  
63 Furthermore, T:L is negatively correlated with L (residual SE = 0.2344; adjusted  $R^2 =$   
64 0.2971; F-statistic = 123.1; df = 288;  $P < 2.2e-16$ ), with a loess curve resembling a power  
65 function with negative scaling exponent (Fig. 5c). For  $L \geq 9$ , the dispersion of T:L values  
66 decreases noticeably, once again as a result of the highly divergent patterns of trunk  
67 elongation within Cetacea.

68

69 TL counts correlate positively with complexity

70 Whereas the standardized contrasts of TL counts correlate positively with both TL  
71 Brillouin and TL evenness (Supplementary Figs 2, 3), only in the case of TL Brillouin is  
72 the correlation significant (residual SE = 0.01444; adjusted  $R^2 = 0.03852$ ; F-statistic =  
73 12.54;  $df = 287$ ;  $P = 0.0004652$ ). Conversely, the correlation is negative for the  
74 standardized contrasts of the presacral counts (Supplementary Figs 4, 5), and significant  
75 only for CTL evenness (residual SE = 0.01158; adjusted  $R^2 = 0.05302$ ; F-statistic =  
76 17.13;  $df = 287$ ;  $P = 0.0004603$ ).

77

78 Thoracolumbar complexity and domains

79 As shown in Supplementary Figs 6, 7, at the lower end of the range of T:L ratios, we  
80 encounter mammals that exhibit the most complex thoracolumbar regions, both in terms  
81 of the relative numerical richness of thoracic and lumbar elements and in the degree to  
82 which such elements are distributed equitably. Most of these are Cetacea, but some  
83 species in other clades also occur within this range (e.g., Laotian rock rat and naked mole-  
84 rat among Glires; hero shrew among Eulipotyphla; indri, Eastern woolly lemur, and  
85 weasel sportive lemur among Primates; koala among Marsupialia). In contrast, the upper  
86 end of the of the range of T:L ratios is dominated almost exclusively by some members  
87 of Afrotheria, Xenarthra, and some Perissodactyla.

88

89 Changes in complexity are both directional and sustained

90 We present results of subclade tests applied to several of the more speciose groups to  
91 demonstrate the impact of group size on the distribution of skewness across our study  
92 sample (Supplementary Table 5). Due to space limitations, we examine two

93 representative indices only, namely TL Brillouin and evenness, in all tested groups. Our  
94 first case-study concerns Euarchonta (Extended Data Fig. 3a, b), partitioned into a  
95 paraphyletic array of early diverging lineages (treeshrews; colugos; lemurs; bushbabies;  
96 tarsiers) and two monophyletic groups, namely New World monkeys and Old World  
97 monkeys plus apes. Application of the subclade test shows that, for both TL Brillouin  
98 and evenness, SCW forms a substantial proportion of the total skewness (67.9%),  
99 followed by SCH (30% and 29%, respectively, for TL Brillouin and evenness), and a  
100 negligible amount of SCB (2.1% and 3.1%). In the case of two groups, Carnivora  
101 (Extended Data Fig. 3c, d) and Cetartiodactyla (Extended Data Fig. 3e, f), we encounter  
102 an unusual, but not unexpected outcome in the distribution of percentages allocated to  
103 the three main components of total skewness. In some circumstances (e.g., uneven  
104 sampling), the subclade test may return negative percentage values as well as percentages  
105 that exceed 100%. To the best of our knowledge, there is no immediate solution to this  
106 problem and indeed, interpreting these percentages becomes arduous. Following  
107 reference<sup>45</sup>, we consider the sum of the absolute values of the SCB, SCH, and SCW  
108 percentages and express the contribution of each as a proportion of that sum. In the case  
109 of Carnivora, partitioned into Caniformia and Feliformia (Extended Data Fig. 3c, d), the  
110 SCB, SCH, and SCW percentages are, respectively, -6.8%, 21.8%, and 85% for TL  
111 Brillouin, and -7.2%, 22.5%, and 84.7% for TL evenness. After conversion, the  
112 proportions of skewness attributed to SCW become 74.8% and 74%, respectively. In  
113 Cetartiodactyla, partitioned into Cetacea and 'Artiodactyla' (Extended Data Fig. 3e, f),  
114 skewness percentages are as follows: SCB = -12.3%, SCH = -66.1%, and SCW = 178.4  
115 % for TL Brillouin; SCB = -6.3%, SCH = -43.8%, and SCW = 150.1 % for TL evenness.  
116 Using the same correction procedure, we find that SCW contributes 69.4% and 74.9% to  
117 total skewness for the two indices. A subclade test applied to Afrotheria, partitioned into

118 Paenungulata and Afroinsectiphilia (Extended Data Fig. 3g, h), returns the following  
119 percentages: SCB = 5.8%, SCH = 25.5%, and SCW = 68.7 % for TL Brillouin; SCB =  
120 7.4%, SCH = 17.6%, and SCW = 75 % for TL evenness. As a final case-study, we use  
121 Chiroptera, partitioned into Yinpterochiroptera (flying foxes; fruit bats; some families of  
122 small-sized bats) and Yangochiroptera (remaining lineages of small-sized bats), the latter  
123 divided into two clades labelled as ‘A’ and ‘B’ for convenience (Extended Data Fig. 3i,  
124 j). In the case of both indices, SCW (50.8% for TL Brillouin; 48.2% for TL evenness)  
125 differs only marginally from SCH (47.2% and 49.5%), and both SCB values are  
126 negligible (2% and 2.3%).

127



## 128 Supplementary Discussion

129 Hypothesis H<sub>0</sub>1: vertebral count variation

130 Our findings support recent efforts to disprove the notion that presacral counts are largely  
131 conserved in extant mammals<sup>46,47,48,49,52,53,62</sup>. We demonstrate that such counts differ  
132 significantly between groups and reveal greater variation than acknowledged hitherto.  
133 The evolutionary, ecological, and functional correlates of this variation<sup>47,52,57,62,63,64,65</sup>  
134 remain a key target for future research. Afrotheria, Xenarthra, Chiroptera, Perissodactyla,  
135 Cetartiodactyla, and Glires are among the groups with the greatest variation in T and L  
136 (Supplementary Data 1) and feature in a large proportion of all significant pair-wise  
137 comparisons between group-specific counts (Supplementary Table 1). Significantly, they  
138 also differ in terms of species richness, with Chiroptera and Glires as the most diverse  
139 clades and Perissodactyla as the least diverse. In this context, however, it is noteworthy  
140 that other speciose clades, such as Eulipotyphla and Euarchonta, appear in many fewer  
141 pair-wise comparisons – alongside Xenarthra and Cetartiodactyla (L counts) and  
142 Perissodactyla (T counts) in the case of Eulipotyphla, and alongside Cetartiodactyla  
143 (CTL, TL, and L counts), Afrotheria and Perissodactyla (TL and T counts), and  
144 Xenarthra (L counts) in the case of Euarchonta (Supplementary Table 1). These results  
145 suggest that taxonomic diversity may not adequately predict variation in thoracolumbar  
146 counts and a formal test of this proposition is part of our work in progress. The smallest  
147 ranges in T counts occur in Eulipotyphla (3) and Perissodactyla (2), the largest in  
148 Xenarthra (15), Afrotheria (10), Glires (9), and Cetartiodactyla (8). Xenarthra, Ferae, and  
149 Perissodactyla exhibit the smallest ranges in L counts (3 each), whereas Cetartiodactyla  
150 (30), Eulipotyphla and Glires (7 each), and Afrotheria and Euarchonta (6 each) show the  
151 largest (Supplementary Data 1). Most strikingly, a TL count of 19, generally considered  
152 to be widespread in extant mammals<sup>48,49</sup>, features in only ~57% of species in our data,

153 mostly among Marsupialia, ‘Artiodactyla’, Euarchonta, Eulipotyphla, and Glires. TL  
154 counts  $\geq 25$  are common in Cetacea but also occur in some Afrotheria (e.g., hyraxes) and  
155 Xenarthra (e.g., two-toed sloths). TL counts  $\leq 16$  are documented in some Xenarthra  
156 (chiefly armadillos) and in a broad cross-section of Chiroptera (especially evening bats,  
157 as well as some slit-faced, New World leaf-nosed, false vampire, and fruit bats).

158 The distribution of TL increases and decreases (Fig. 4a) across the phylogeny invites  
159 a consideration of ecological and functional drivers of axial regionalization<sup>52,62</sup>. In some  
160 highly speciose groups, especially Glires, decreases are widespread whereas increases  
161 are generally confined to individual species or clades. One remarkable example of such  
162 clades is Nesomyinae, or Malagasy rodents (Malagasy short-tailed, tufted-tailed, and  
163 white-tailed rats), a small but morphologically diverse subfamily of arboreal, cursorial,  
164 and fossorial species with a wide range of body proportions and foraging habits, and  
165 including spectacular examples of convergence with phylogenetically distant groups,  
166 such as rabbits, voles, and mice. Another instance of thoracolumbar increase occurs in  
167 the tribe Akodontini (South America grass mice; crimson-nosed rats; brucies; shrew-  
168 mice; burrowing mice; giant rats; swamp rats), a speciose clade of New World rodents  
169 adapted to diverse environments, from tropical forests and altiplanos to salt marshes,  
170 grasslands, and deserts. In other groups with similarly infrequent TL increases, these are  
171 also usually associated with specialised locomotory modes (e.g., gliding; suspensory;  
172 tree-climbing) and lifestyles (e.g., fossoriality)<sup>46,47,52,62</sup>. Notable examples include early  
173 diverging clades of Euarchonta (e.g., treeshrews; colugos; several true lemurs), some  
174 New World primates (e.g., howler monkeys; tamarins), Marsupialia (mostly opossums),  
175 and Eulipotyphla (e.g., various lineages of Asiatic moles; hero shrews). In striking  
176 contrast to most other groups, Carnivora display ubiquitous (albeit negligible) TL  
177 increases but comparatively fewer decreases. Such decreases occur mostly among

178 raccoons, weasels, and otters, but the significance of this distribution is unclear. Lastly,  
179 Cetacea stand out relative to other clades in revealing intricate patterns of interested  
180 increases and decreases within toothed and baleen whales. This pattern is particularly  
181 evident among oceanic dolphins, many of which feature examples of niche partitioning  
182 and foraging specializations in recently diverged sister taxa.

183

184 Hypothesis H<sub>0</sub>2: complexity trends

185 Despite a general tendency for TL Brillouin and evenness to increase over time, the  
186 temporal trends exhibited by individual groups reveal conflicting patterns. For example,  
187 in Afrotheria, Xenarthra, Ferae, and Perissodactyla, the regression slopes from analyses  
188 of ancestral node estimates vs. node ages are non-significant (Supplementary Table 4).  
189 In those groups, the temporal distribution of ancestral complexity estimates is markedly  
190 heteroscedastic, thereby potentially obfuscating or weakening any underlying pattern. In  
191 contrast, in groups characterized by smaller variances in complexity values (e.g., Glires),  
192 trends emerge more distinctly (Fig. 6a, c, e, g; Extended Data Fig. 2a, c; Supplementary  
193 Figs 8–13; Supplementary Table 4). Lastly, results from the subclade tests highlight the  
194 influence of group size on the balance between passive and driven processes of  
195 complexity change. Whereas analyses of the entire species sample (Supplementary Figs  
196 20–24; Supplementary Table 5) suggest the prevalence of a diffusive model of  
197 complexity change, tests carried out on some of the most speciose clades point to driven  
198 trends (Extended Data Fig. 3). Taken together, our results support sustained and  
199 directional changes in the evolution of axial regionalization, thereby providing the only  
200 other tested case-study of a driven complexity trend in a major clade<sup>25</sup>.

201 One major conclusion from our investigation is that estimates of complexity at the  
202 internal nodes of the phylogeny correlate positively and significantly with the magnitude

203 of changes along the branches subtended by those nodes (Fig. 6b, d, f, h; Extended Data  
204 Fig. 2b, d; Supplementary Figs 14–19; Supplementary Table 4), a pattern that is  
205 replicated in all major groups. In this respect, therefore, changes in complexity mirror  
206 those of other macroevolutionary traits, particularly body size, where higher initial values  
207 tend to be associated with further downstream increases in descendant lineages<sup>94</sup> and  
208 have been interpreted as evidence for adaptive evolution<sup>94</sup>. Whereas tests of the adaptive  
209 role of complexity<sup>52,62</sup> are outside the scope of this Article, our results appear *consistent*  
210 with such a role, at least in certain domains of the phylogeny. For example, increasing  
211 complexity characterizes branches that either subtend, or immediately precede, major  
212 ecological and environmental shifts, such as the transition from land to water in Cetacea  
213 and the conquest of the air in Chiroptera (Fig. 4b, c; Extended Data Fig. 1a, b). Other  
214 increases are associated with structural and functional innovations, a classical example  
215 of which is provided by Perissodactyla. Among extant Perissodactyla, both equids and  
216 tapirids (but not rhinocerotids) feature increases in both thoracolumbar counts and  
217 complexity (Fig. 4a-c). In the case of equids, the evolutionary transition from small,  
218 forest-dwelling taxa to the mid- and large-sized species of today's savannahs and  
219 grasslands was accompanied by the emergence of multiple traits associated with  
220 cursoriality. These traits include a dorsostable column, elongate limbs, reduction in digit  
221 numbers, and digit elongation<sup>95</sup>. Like their extant counterparts, early equids were also  
222 built for speed, with several lineages independently acquiring various degrees of axial  
223 elongation. Following the radiation of equids into open habitats and the increasing  
224 demands for sustained speed, axial elongation became co-opted for enhanced  
225 biomechanical efficiency alongside a suite of novel morphofunctional characteristics  
226 (e.g., reduction and subsequent loss of sagittal flexibility at the thoracic-lumbar  
227 boundary; development of intervertebral ligaments and interlocking vertebral joints<sup>95</sup>).

228

229 Hypothesis H<sub>03</sub>: evolutionary rates

230 For all complexity indices, we find unequivocal support for multiple-rate models of  
231 evolution<sup>69,70</sup>. These results are in broad agreement with those of recent analyses that  
232 have employed linear measurements and geometric morphometric data to examine axial  
233 regionalization. Using a representative sample of extant mammals and their immediate  
234 outgroups among non-mammalian synapsids, a recent study<sup>54</sup> has uncovered two major  
235 phases in the evolution of the vertebral column, viz. an increase in morphological  
236 differentiation *between* regions followed by augmented integration *within* regions<sup>54</sup>. The  
237 same study has challenged previous scenarios of gradual increases in column complexity  
238 over time<sup>58</sup>, replacing them with a model of stepwise shifts between optima<sup>54</sup>. Although  
239 our approach to measuring axial complexity lacks the detail of morphological studies, we  
240 retrieve a similar pattern of stepwise shifts in rates of complexity change, typically in the  
241 form of pulse-like, inter-nested rate increases and decreases. Numerous increases with  
242 high posterior probabilities characterize younger branches of the phylogeny (Extended  
243 Data Figs 4, 5) and, at least in some groups (e.g., Cetacea), are consistent with episodes  
244 of rapid divergence in axial patterning between closely related species. In contrast,  
245 widespread and sustained decreases are consistent with evolutionary tendencies towards  
246 stable optima, such as may be represented by conserved vertebral constructions.

247

## 248 Supplementary Figures

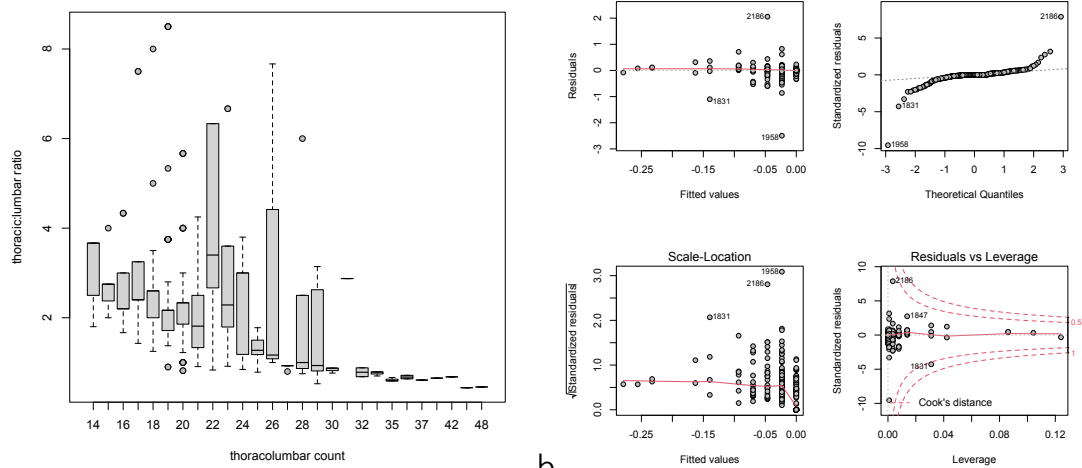

249 a

b

250

251 **Supplementary Fig. 1 | Independent contrasts ('brunch' algorithm) analysis of the**252 **relationship between thoracic:lumbar ratios and thoracolumbar counts in 1,136**253 **extant mammal species. a, Bivariate scatterplot of ratios vs. counts; for any given count,**254 **the distribution of ratios is presented in the form of a box and whisker plot, inclusive of**255 **median values, minimum and maximum values (excluding outliers), interquartile**256 **ranges, and outlying data points. b, Diagnostic plots associated with the independent**257 **contrasts analysis (see Supplementary Table 3).**

258

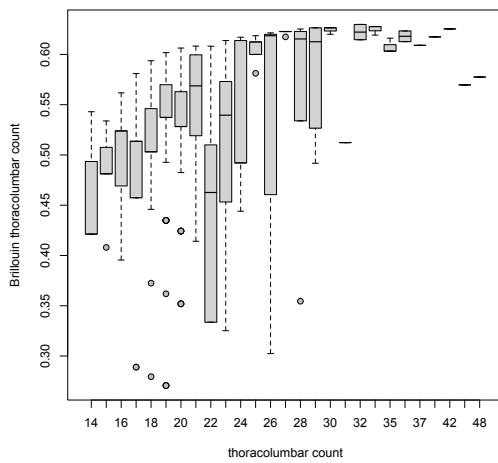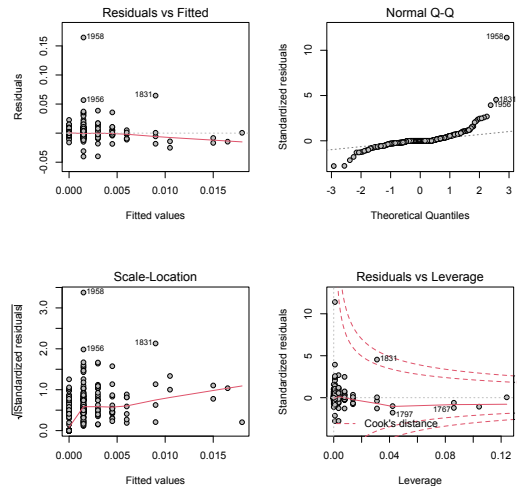

259 a

b

260 **Supplementary Fig. 2 | Independent contrasts ('brunch' algorithm) analysis of the**  
 261 **relationship between the Brillouin index of the thoracolumbar region and the**  
 262 **thoracolumbar counts in 1,136 extant mammal species.** For explanations, see caption  
 263 of Supplementary Fig. 1.

264

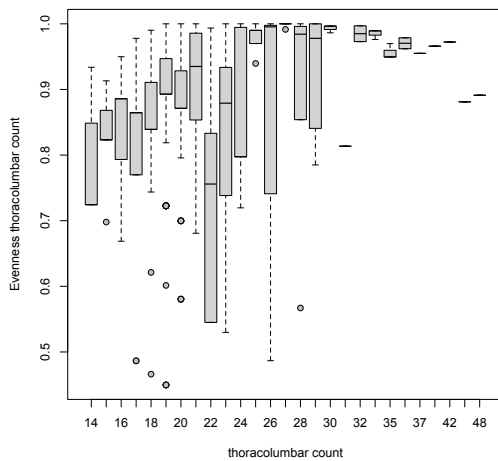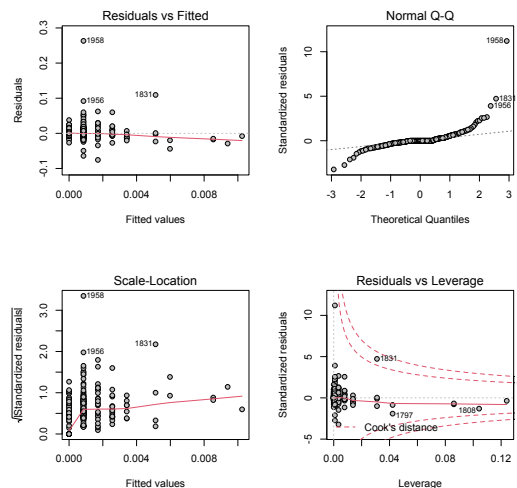

265 a

b

266 **Supplementary Fig. 3 | Independent contrasts ('brunch' algorithm) analysis of the**  
 267 **relationship between the evenness index of the thoracolumbar region and the**  
 268 **thoracolumbar counts in 1,136 extant mammal species.** For explanations, see caption  
 269 of Supplementary Fig. 1.

270

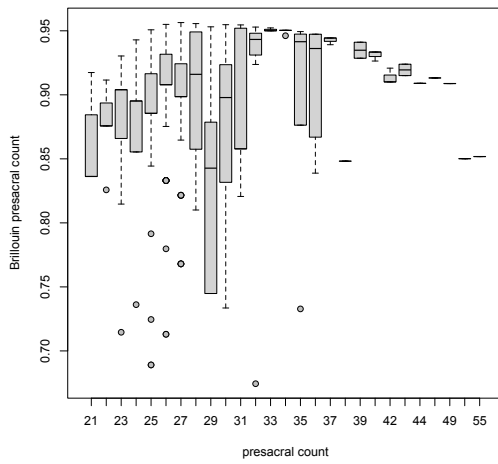

271 a

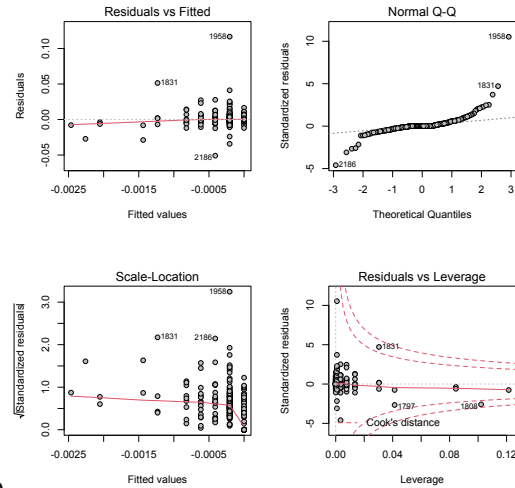

b

272 **Supplementary Fig. 4 | Independent contrasts ('brunch' algorithm) analysis of the**  
 273 **relationship between the Brillouin index of the presacral region and the presacral**  
 274 **counts in 1,136 extant mammal species. For explanations, see caption of**  
 275 **Supplementary Fig. 1.**

276

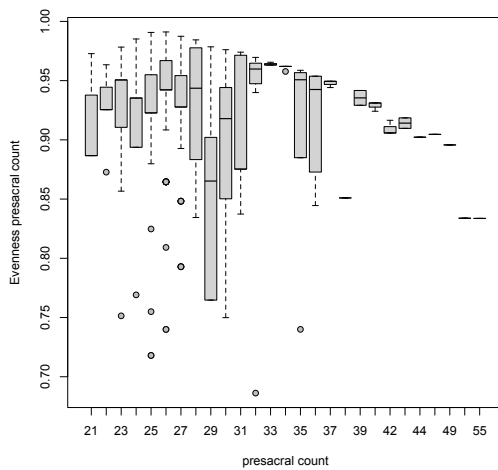

277 a

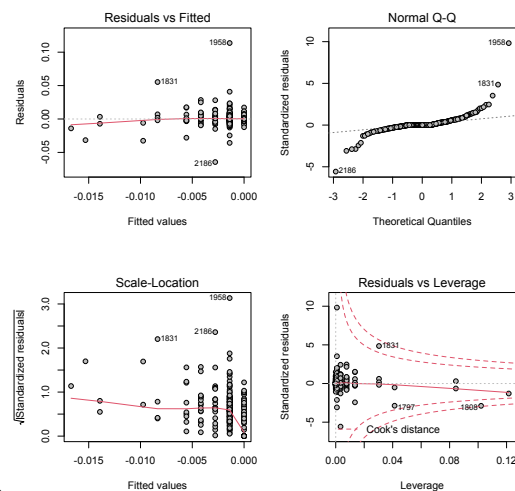

b

278 **Supplementary Fig. 5 | Independent contrasts ('brunch' algorithm) analysis of the**  
 279 **relationship between the evenness index of the presacral region and the presacral**



280 counts in 1,136 extant mammal species. For explanations, see caption of  
 281 Supplementary Fig. 1.

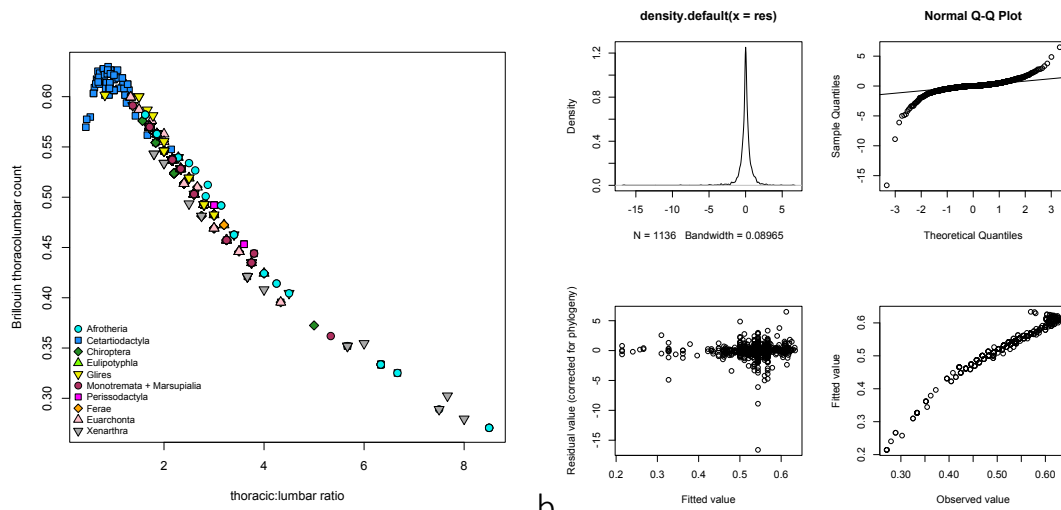

282 a

b

283 **Supplementary Fig. 6 | Phylogenetic generalised least squares (PGLS) analysis of the**  
 284 **relationship between the Brillouin index of the thoracolumbar region and the**  
 285 **thoracic:lumbar ratios in 1,136 extant mammal species. a, Bivariate scatterplot of**  
 286 **index vs. ratios; the data points are shown in different colours and symbols associated**  
 287 **with major mammal groups. b, Diagnostic plots associated with the PGLS analysis (see**  
 288 **Supplementary Table 3).**

289

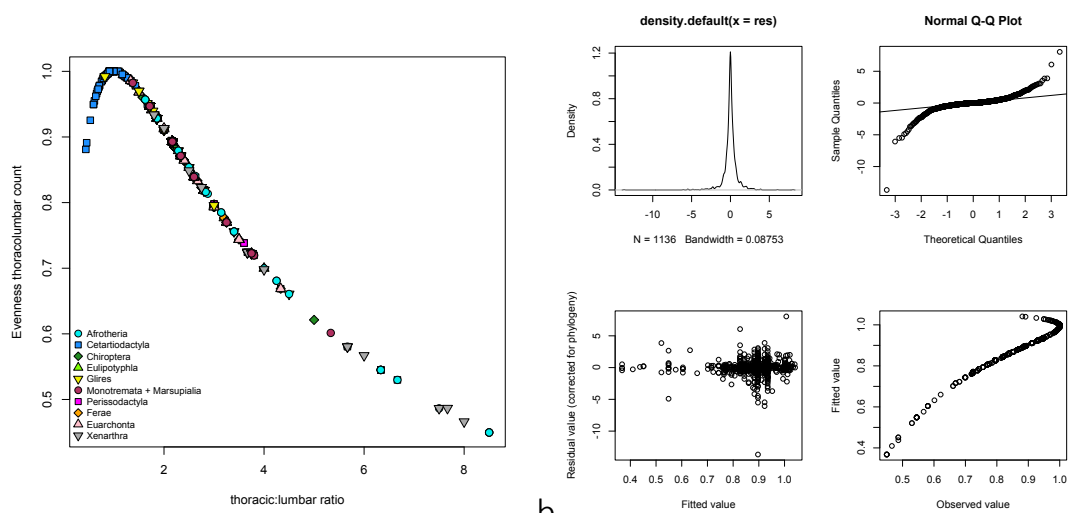

290 a

b

291 **Supplementary Fig. 7 | Phylogenetic generalised least squares (PGLS) analysis of the**  
292 **relationship between the evenness index of the thoracolumbar region and the**  
293 **thoracic:lumbar ratios in 1,136 extant mammal species.** For explanations, see caption  
294 of Supplementary Fig. 6.  
295

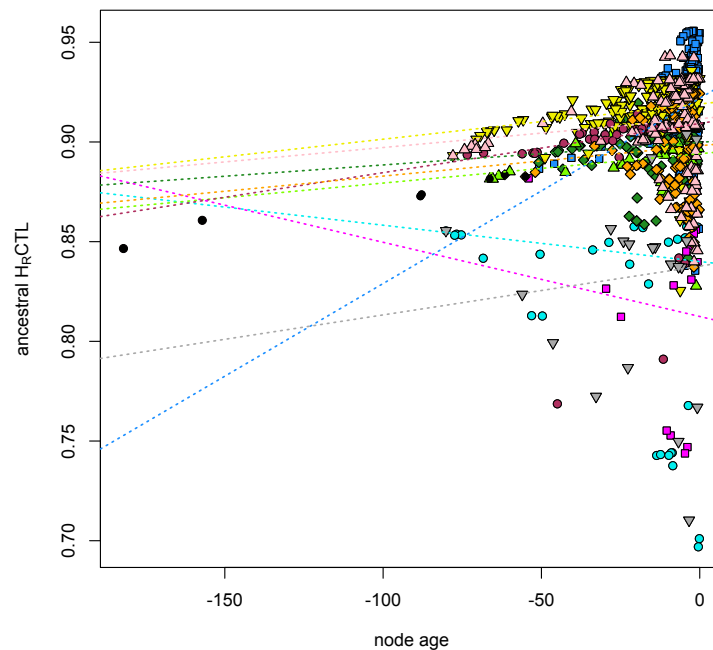

296  
297 **Supplementary Fig. 8 | Robust linear regression analysis of the relationship between**  
298 **maximum likelihood node estimates for the presacral Brillouin index and node ages.**  
299 Bivariate scatterplot of index estimates at the internal nodes of the mammal phylogeny  
300 vs. node ages (in millions of years) with superimposed regression lines for major  
301 mammal groups (see Supplementary Table 4).  
302

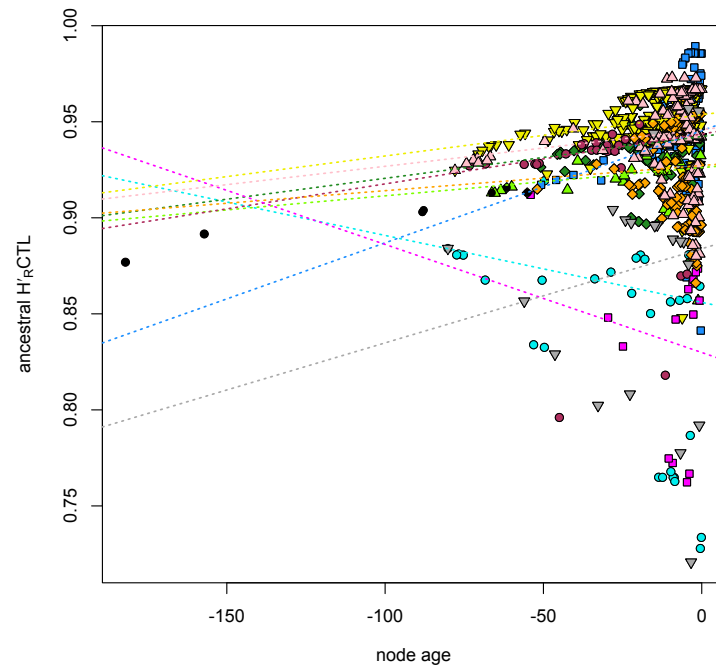

303

304 **Supplementary Fig. 9 | Robust linear regression analysis of the relationship between**305 **maximum likelihood node estimates for the presacral evenness index and node ages.**

306 For explanations, see caption of Supplementary Fig. 8.

307

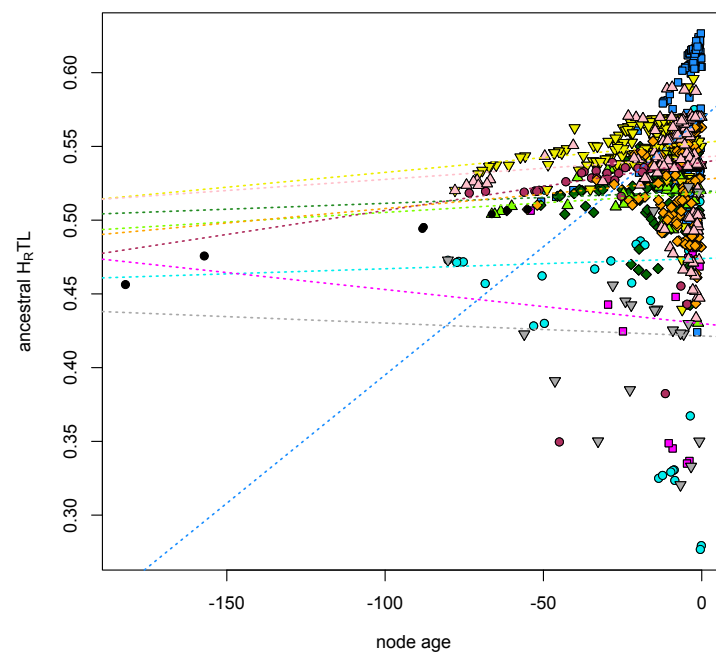

308

309 **Supplementary Fig. 10 | Robust linear regression analysis of the relationship between**  
310 **maximum likelihood node estimates for the thoracolumbar Brillouin index and node**  
311 **ages.** For explanations, see caption of Supplementary Fig. 8.

312

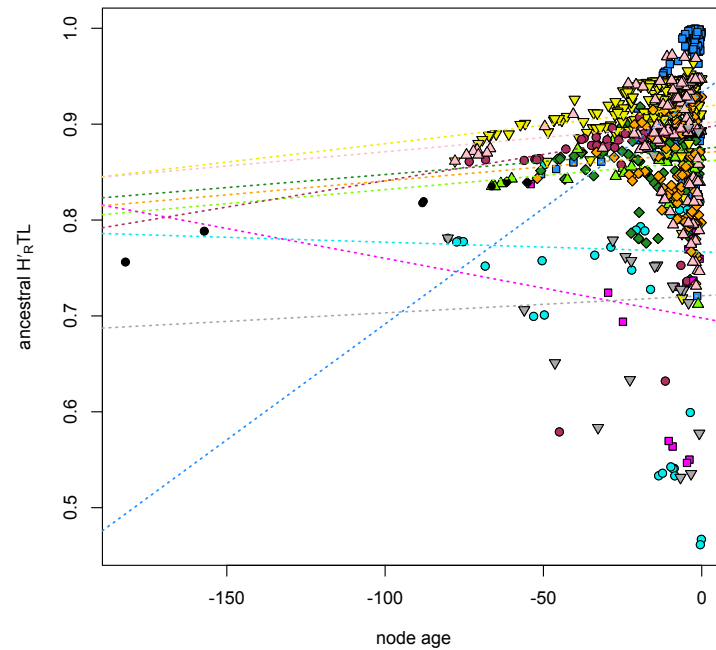

313

314 **Supplementary Fig. 11 | Robust linear regression analysis of the relationship between**  
315 **maximum likelihood node estimates for the thoracolumbar evenness index and node**  
316 **ages.** For explanations, see caption of Supplementary Fig. 8.

317

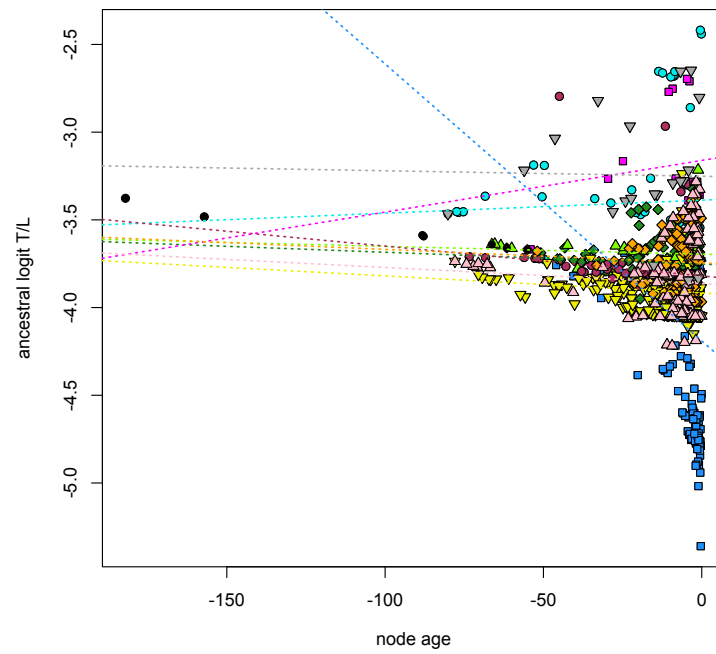

318

319 **Supplementary Fig. 12 | Robust linear regression analysis of the relationship between**320 **maximum likelihood node estimates for the logit-transformed thoracic:lumbar ratios**321 **and node ages.** For explanations, see caption of Supplementary Fig. 8.

322

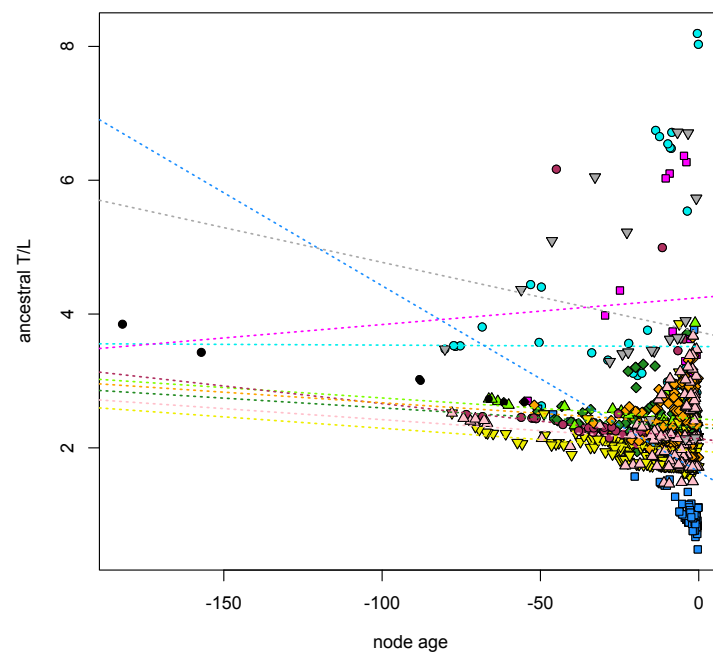

323

324 **Supplementary Fig. 13 | Robust linear regression analysis of the relationship between**  
 325 **maximum likelihood node estimates for the unstandardized thoracic:lumbar ratios**  
 326 **and node ages.** For explanations, see caption of Supplementary Fig. 8.  
 327

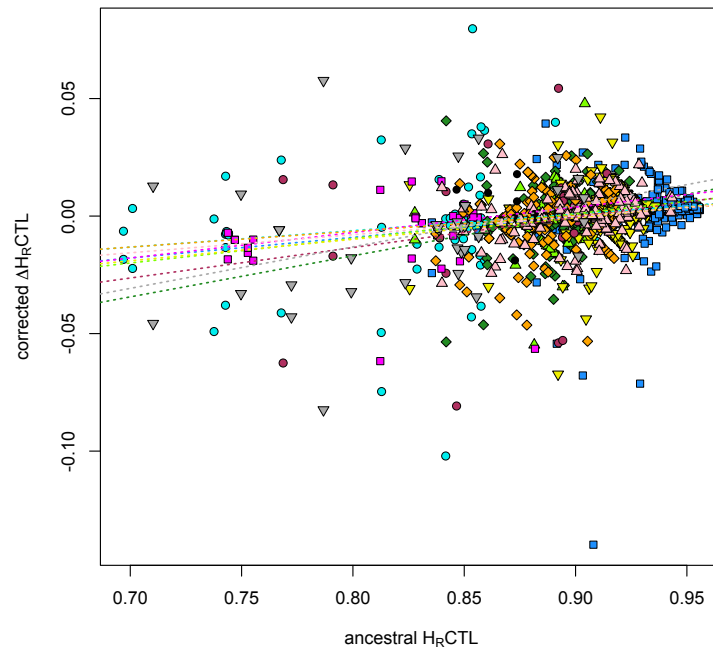

328  
 329 **Supplementary Fig. 14 | Robust linear regression analysis of the relationship between**  
 330 **descendant-ancestor differences (corrected for the regression to the mean) for the**  
 331 **presacral Brillouin index and maximum likelihood node estimates.** Bivariate  
 332 scatterplot of descendant-ancestor index differences along the tree branches  
 333 (descendant node value minus ancestor node value) vs. index estimates at the internal  
 334 nodes of the mammal phylogeny (in millions of years) with superimposed regression  
 335 lines for major mammal groups (see Supplementary Table 4).  
 336

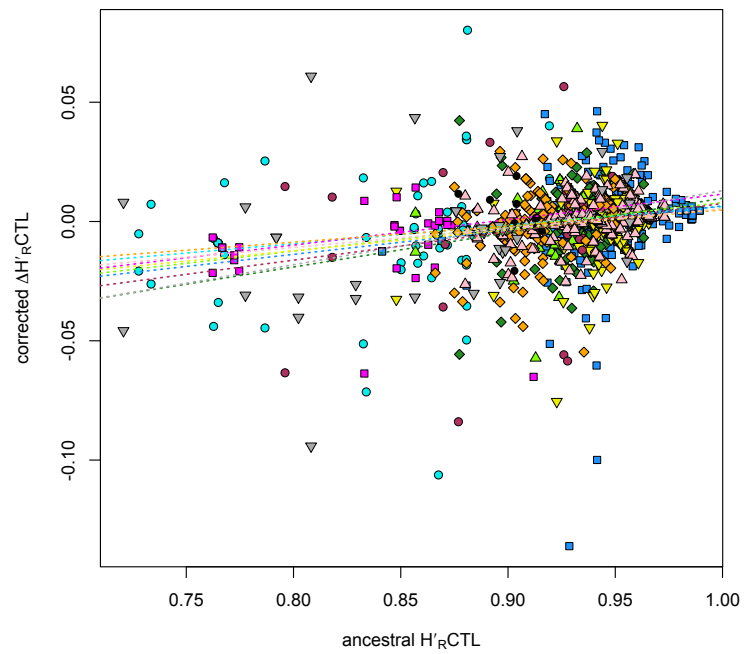

337

338 **Supplementary Fig. 15 | Robust linear regression analysis of the relationship between**339 **descendant-ancestor differences (corrected for the regression to the mean) for the**340 **presacral evenness index and maximum likelihood node estimates. For explanations,**341 **see caption of Supplementary Fig. 14.**

342

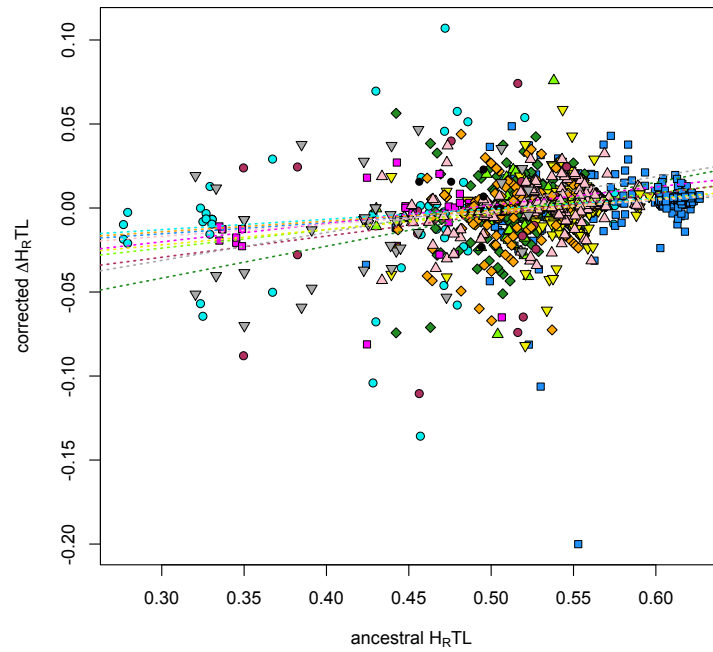

343

344 **Supplementary Fig. 16 | Robust linear regression analysis of the relationship between**345 **descendant-ancestor differences (corrected for the regression to the mean) for the**346 **thoracolumbar Brillouin index and maximum likelihood node estimates. For**347 **explanations, see caption of Supplementary Fig. 14.**

348



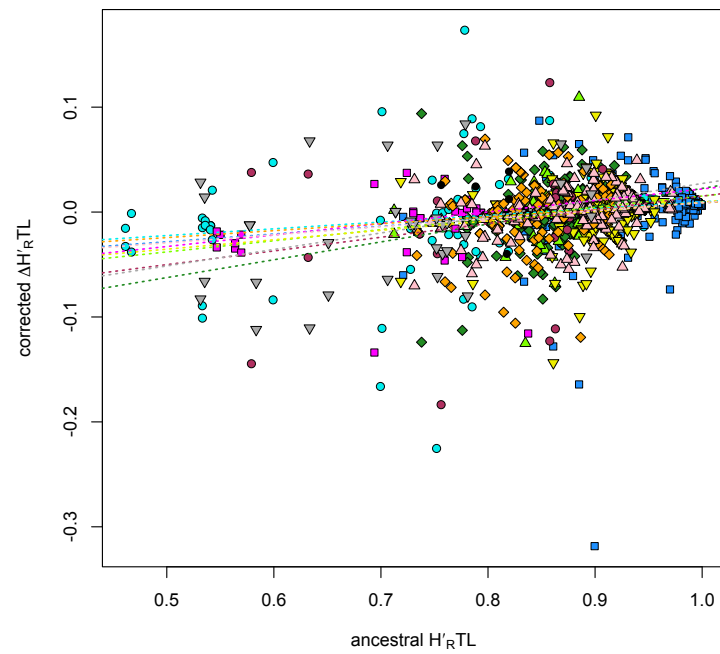

349

350 **Supplementary Fig. 17 | Robust linear regression analysis of the relationship between**  
351 **descendant-ancestor differences (corrected for the regression to the mean) for the**  
352 **thoracolumbar evenness index and maximum likelihood node estimates. For**  
353 **explanations, see caption of Supplementary Fig. 14.**

354

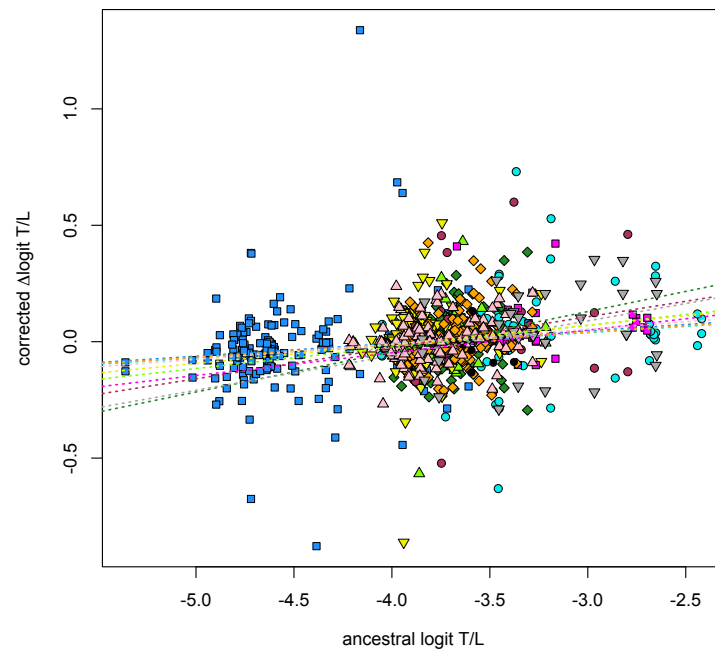

355

356 **Supplementary Fig. 18 | Robust linear regression analysis of the relationship between**  
357 **descendant-ancestor differences (corrected for the regression to the mean) for the**  
358 **logit-transformed thoracic:lumbar ratios and maximum likelihood node estimates.**

359 For explanations, see caption of Supplementary Fig. 14.

360

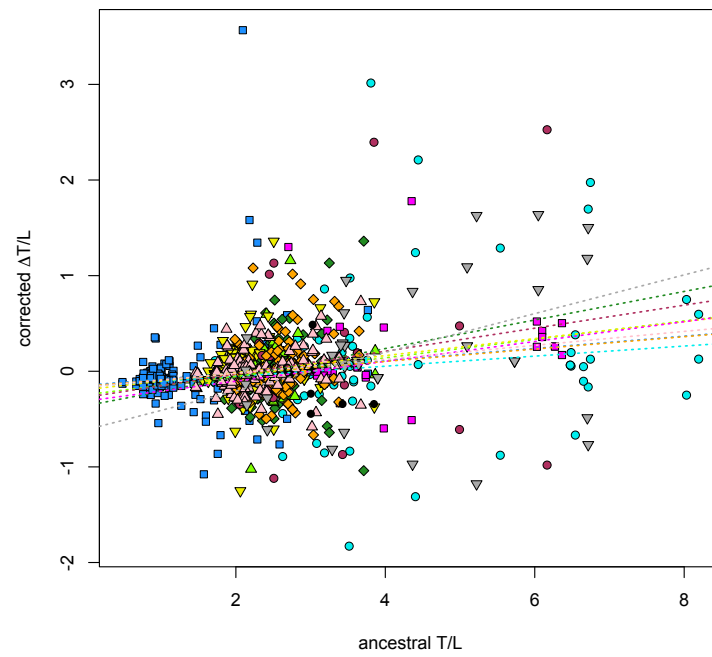

361

362 **Supplementary Fig. 19 | Robust linear regression analysis of the relationship between**  
363 **descendant-ancestor differences (corrected for the regression to the mean) for the**  
364 **unstandardized thoracic:lumbar ratios and maximum likelihood node estimates. For**  
365 explanations, see caption of Supplementary Fig. 14.

366

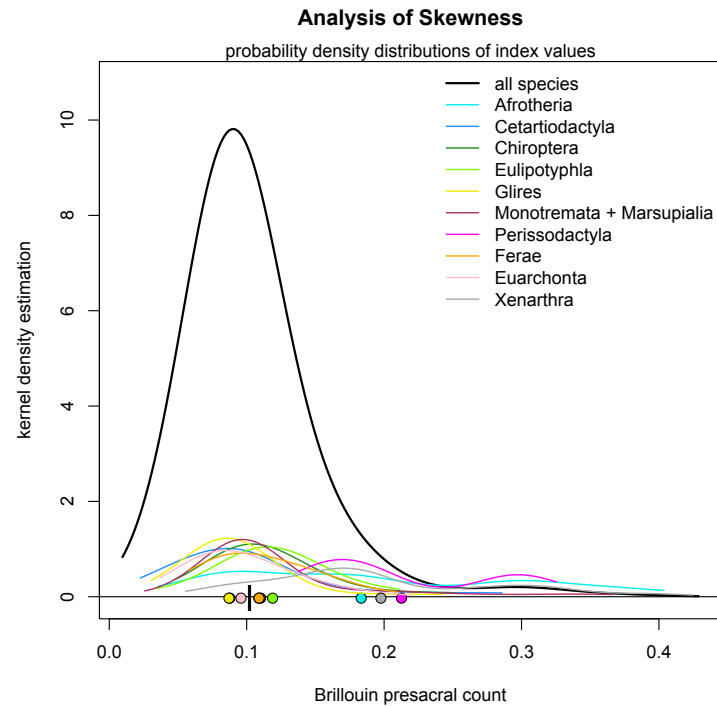

367

368 **Supplementary Fig. 20 | Results of skewness partitioning test applied to the presacral**369 **Brillouin index for the entire mammal species sample.** In the plot, the colour-coded

370 thin lines represent the probability density distributions of the index values in each

371 major mammal group, whereas the thick black line shows the probability density

372 distribution for the entire sample. The mean values of the individual groups are

373 represented by colour-coded circles, whereas the mean value of the entire distribution

374 is marked by a black vertical bar (see Supplementary Table 5).

375

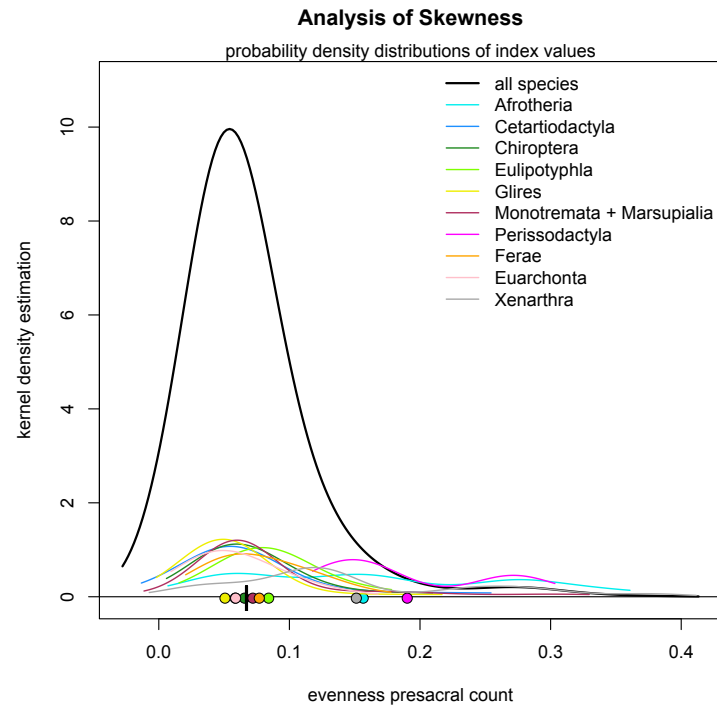

376

377 **Supplementary Fig. 21 | Results of skewness partitioning test applied to the presacral**378 **evenness index for the entire mammal species sample.** For explanations, see caption

379 of Supplementary Fig. 20.

380

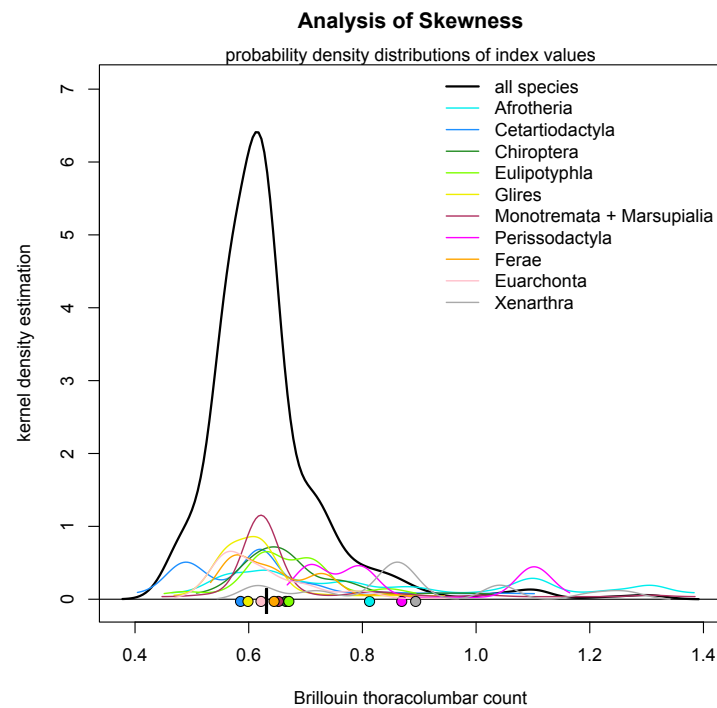

381

382 **Supplementary Fig. 22 | Results of skewness partitioning test applied to the**  
 383 **thoracolumbar Brillouin index for the entire mammal species sample.** For  
 384 explanations, see caption of Supplementary Fig. 20.

385

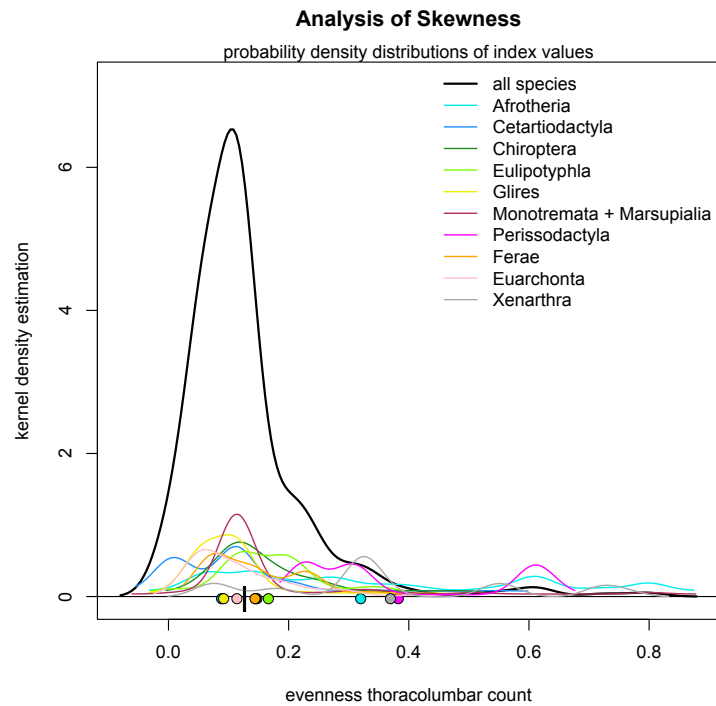

386

387 **Supplementary Fig. 23 | Results of skewness partitioning test applied to the**  
 388 **thoracolumbar evenness index for the entire mammal species sample.** For  
 389 explanations, see caption of Supplementary Fig. 20.

390

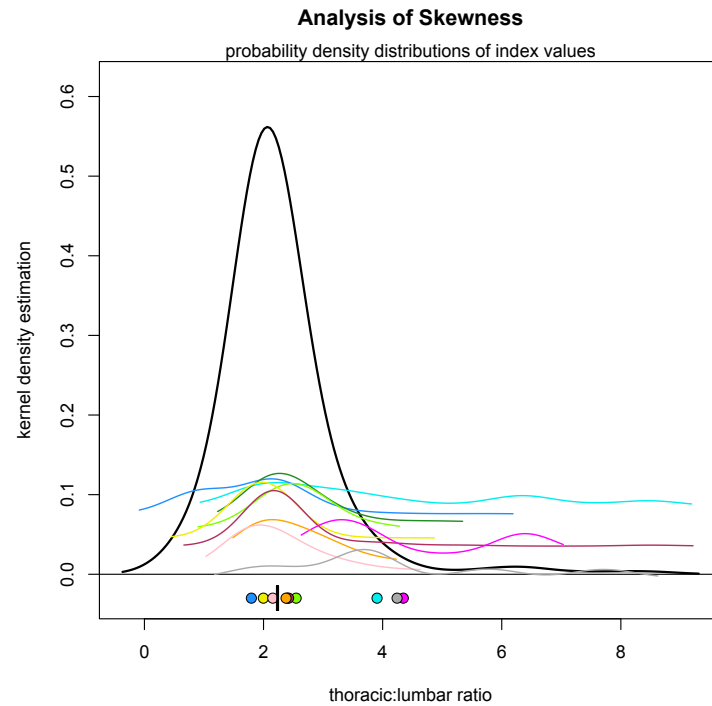

391

392 **Supplementary Fig. 24 | Results of skewness partitioning test applied to the**393 **unstandardized thoracic:lumbar ratio for the entire mammal species sample. For**394 **explanations, see caption of Supplementary Fig. 20.**
