# Supplementary material for: Divergent vertebral formulae shape the evolution of axial complexity in mammals
Source: PubMed Central journal article supplement (PMC9998275; doi:10.1038/s41559-023-01982-5), 2023-03-06
Supplement: 41559_2023_1982_MOESM6_ESM.pdf [file 41559_2023_1982_MOESM6_ESM.pdf]

#NEXUS

[R-package APE, Wed Jul 14 13:20:46 2021]

BEGIN TAXA;

DIMENSIONS NTAX = 1136;

TAXLABELS

Zaglossus\_bruijnii  
Tachyglossus\_aculeatus  
Ornithorhynchus\_anatinus  
Solenodon\_paradoxus  
Solenodon\_cubanus  
Galemys\_pyrenaicus  
Scapanus\_latimanus  
Scalopus\_aquaticus  
Talpa\_europaea  
Euroscaptor\_mizura  
Euroscaptor\_micrura  
Mogera\_tokudae  
Mogera\_imaizumii  
Mogera\_wogura  
Euroscaptor\_subanura  
Condylura\_cristata  
Hylomys\_suillus  
Echinosorex\_gymnura  
Erinaceus\_europaeus  
Peraechinus\_micropus  
Hemiechinus\_auritus  
Atelerix\_algirus  
Scutisorex\_somereni  
Suncus\_madagascariensis  
Crocidura\_crenata  
Crocidura\_canariensis  
Sorex\_araneus  
Sorex\_minutus  
Cryptotis\_parva  
Blarina\_hylophaga  
Notiosorex\_crawfordi  
Smutsia\_gigantea  
Phataginus\_tricuspis  
Manis\_pentadactyla  
Urocyon\_cinereoargenteus  
Vulpes\_lagopus  
Vulpes\_zerda  
Vulpes\_vulpes  
Otocyon\_megalotis  
Nyctereutes\_procyonoides  
Lycaon\_pictus  
Chrysocyon\_brachyurus  
Canis\_mesomelas  
Canis\_simensis  
Canis\_latrans  
Canis\_aureus  
Canis\_lupus  
Cuon\_alpinus  
Canis\_adustus  
Pseudalopex\_gymnocercus  
Speothos\_venaticus  
Cerdocyon\_thous

Neomonachus\_tropicalis  
Monachus\_monachus  
Mirounga\_leonina  
Mirounga\_angustirostris  
Lobodon\_carcinophaga  
Leptonychotes\_weddellii  
Ommatophoca\_rossii  
Hydrurga\_leptonyx  
Erignathus\_barbatus  
Pagophilus\_groenlandicus  
Phoca\_vitulina  
Pusa\_hispida  
Halichoerus\_grypus  
Cystophora\_cristata  
Odobenus\_rosmarus  
Callorhinus\_ursinus  
Zalophus\_californianus  
Zalophus\_japonicus  
Eumetopias\_jubatus  
Arctocephalus\_pusillus  
Neophoca\_cinerea  
Otaria\_bryonia  
Arctocephalus\_tropicalis  
Arctocephalus\_forsteri  
Arctocephalus\_australis  
Mydaus\_javanensis  
Spilogale\_gracilis  
Mephitis\_mephitis  
Conepatus\_humboldtii  
Conepatus\_chinga  
Potos\_flavus  
Procyon\_lotor  
Procyon\_cancrivorus  
Bassariscus\_astutus  
Nasua\_nasua  
Nasua\_narica  
Bassaricyon\_alleni  
Taxidea\_taxus  
Meles\_meles  
Meles\_anakuma  
Arctonyx\_collaris  
Mellivora\_capensis  
Gulo\_gulo  
Martes\_flavigula  
Martes\_foina  
Martes\_zibellina  
Martes\_martes  
Martes\_americana  
Martes\_pennanti  
Eira\_barbara  
Melogale\_orientalis  
Neovison\_vison  
Mustela\_frenata  
Mustela\_felipei  
Mustela\_erminea  
Mustela\_nivalis  
Mustela\_sibirica  
Mustela\_nigripes

Mustela\_lutreolina  
Mustela\_putorius  
Ictonyx\_libyca  
Galictis\_vittata  
Lyncodon\_patagonicus  
Galictis\_cuja  
Pteronura\_brasiliensis  
Lontra\_longicaudis  
Lontra\_provocax  
Lontra\_canadensis  
Enhydra\_lutris  
Lutra\_maculicollis  
Lutra\_lutra  
Aonyx\_cinerea  
Lutrogale\_perspiciolata  
Aonyx\_capensis  
Ailurus\_fulgens  
Ursus\_maritimus  
Ursus\_arctos  
Melursus\_ursinus  
Ursus\_thibetanus  
Ursus\_americanus  
Helarctos\_malayanus  
Ailuropoda\_melanoleuca  
Nandinia\_binotata  
Hyaena\_hyaena  
Hyaena\_brunnea  
Proteles\_cristata  
Crocuta\_crocuta  
Eupleres\_goudotii  
Salanoia\_concolor  
Galidictis\_fasciata  
Galidia\_elegans  
Cryptoprocta\_ferox  
Herpestes\_vitticollis  
Herpestes\_javanicus  
Herpestes\_edwardsii  
Herpestes\_ichneumon  
Ichneumia\_albicauda  
Cynictis\_penicillata  
Bdeogale\_crassicauda  
Crossarchus\_obscurus  
Helogale\_parvula  
Liberiictis\_kuhni  
Mungos\_mungo  
Suricata\_suricatta  
Genetta\_maculata  
Genetta\_tigrina  
Genetta\_genetta  
Genetta\_servalina  
Viverricula\_indica  
Viverra\_tangalunga  
Viverra\_zibetha  
Civettictis\_civetta  
Macrogalidia\_musschenbroekii  
Cynogale\_bennettii  
Hemigalus\_derbyanus  
Paradoxurus\_hermaphroditus

Arctictis\_binturong  
Prionodon\_pardicolor  
Prionodon\_linsang  
Neofelis\_nebulosa  
Panthera\_tigris  
Panthera\_onca  
Panthera\_uncia  
Panthera\_pardus  
Panthera\_leo  
Lynx\_rufus  
Lynx\_lynx  
Lynx\_canadensis  
Acinonyx\_jubatus  
Puma\_concolor  
Felis\_catus  
Felis\_silvestris  
Leopardus\_pardalis  
Leopardus\_wiedii  
Leopardus\_tigrinus  
Prionailurus\_bengalensis  
Leptailurus\_serval  
Caracal\_caracal  
Equus\_africanus  
Equus\_grevyi  
Equus\_quagga  
Equus\_zebra  
Equus\_hemionus  
Equus\_caballus  
Equus\_ferus  
Tapirus\_indicus  
Tapirus\_terrestris  
Tapirus\_bairdii  
Rhinoceros\_unicornis  
Rhinoceros\_sondaicus  
Dicerorhinus\_sumatrensis  
Diceros\_bicornis  
Ceratotherium\_simum  
Vicugna\_pacos  
Vicugna\_vicugna  
Lama\_glama  
Camelus\_dromedarius  
Camelus\_ferus  
Tayassu\_pecari  
Pecari\_tajacu  
Sus\_scrofa  
Sus\_barbatus  
Potamochoerus\_porcus  
Phacochoerus\_africanus  
Phacochoerus\_aethiopicus  
Hylochoerus\_meinertzhageni  
Babyrousa\_babyrousa  
Hippopotamus\_amphibius  
Choeropsis\_liberiensis  
Indopacetus\_pacificus  
Kogia\_sima  
Kogia\_breviceps  
Physeter\_macrocephalus  
Platanista\_gangetica

Pontoporia\_blainvillei  
Inia\_geoffrensis  
Inia\_araguaiaensis  
Lipotes\_vexillifer  
Delphinapterus\_leucas  
Mesoplodon\_bowdoini  
Monodon\_monoceros  
Neophocaena\_phocaenoides  
Phocoenoides\_dalli  
Phocoena\_phocoena  
Phocoena\_spinipinnis  
Phocoena\_dioptrica  
Lagenorhynchus\_acutus  
Lagenorhynchus\_albirostris  
Orcinus\_orca  
Orcaella\_brevirostris  
Grampus\_griseus  
Pseudorca\_crassidens  
Peponocephala\_electra  
Globicephala\_melas  
Globicephala\_macrorhynchus  
Feresa\_attenuata  
Steno\_bredanensis  
Sotalia\_guianensis  
Sotalia\_fluviatilis  
Tursiops\_truncatus  
Stenella\_attenuata  
Lagenodelphis\_hosei  
Stenella\_longirostris  
Sousa\_chinensis  
Tursiops\_aduncus  
Stenella\_frontalis  
Stenella\_coeruleoalba  
Stenella\_clymene  
Delphinus\_delphis  
Delphinus\_capensis  
Lagenorhynchus\_obscurus  
Lagenorhynchus\_obliquidens  
Lagenorhynchus\_cruciger  
Lagenorhynchus\_australis  
Cephalorhynchus\_hectori  
Cephalorhynchus\_heavisidii  
Cephalorhynchus\_eutropia  
Cephalorhynchus\_commerstonii  
Berardius\_bairdii  
Berardius\_arnuxii  
Mesoplodon\_bidens  
Ziphius\_cavirostris  
Mesoplodon\_stejnegeri  
Hyperoodon\_planifrons  
Hyperoodon\_ampullatus  
Mesoplodon\_hectori  
Mesoplodon\_carlhubbsi  
Mesoplodon\_layardii  
Mesoplodon\_mirus  
Mesoplodon\_europaeus  
Mesoplodon\_densirostris  
Mesoplodon\_grayi

Tasmacetus\_shepherdi  
Eubalaena\_glacialis  
Eubalaena\_japonica  
Balaenoptera\_physalus  
Balaenoptera\_musculus  
Balaenoptera\_omurai  
Balaenoptera\_borealis  
Balaenoptera\_edeni  
Mesoplodon\_perrini  
Balaenoptera\_bonaerensis  
Mesoplodon\_peruvianus  
Lissodelphis\_peronii  
Lissodelphis\_borealis  
Balaena\_mysticetus  
Caperea\_marginata  
Balaenoptera\_acutorostrata  
Mesoplodon\_ginkgodens  
Megaptera\_novaeangliae  
Eschrichtius\_robustus  
Moschiola\_meminna  
Moschiola\_indica  
Tragulus\_javanicus  
Tragulus\_kanchil  
Tragulus\_napu  
Okapia\_johnstoni  
Giraffa\_camelopardalis  
Antilocapra\_americana  
Muntiacus\_muntjak  
Dama\_dama  
Elaphurus\_davidianus  
Rusa\_unicolor  
Cervus\_elaphus  
Axis\_calamianensis  
Axis\_axis  
Rangifer\_tarandus  
Odocoileus\_virginianus  
Odocoileus\_hemionus  
Mazama\_gouazoubira  
Blastocerus\_dichotomus  
Pudu\_puda  
Hydropotes\_inermis  
Capreolus\_capreolus  
Alces\_alces  
Moschus\_moschiferus  
Moschus\_berezovskii  
Boselaphus\_tragocamelus  
Tetracerus\_quadricornis  
Tragelaphus\_imberbis  
Tragelaphus\_angasii  
Tragelaphus\_scriptus  
Tragelaphus\_eurycerus  
Tragelaphus\_spekii  
Tragelaphus\_buxtoni  
Tragelaphus\_strepsiceros  
Syncerus\_caffer  
Bubalus\_mindorensis  
Bubalus\_depressicornis  
Bubalus\_arnee

Bos\_gaurus  
Bos\_taurus  
Bos\_indicus  
Bison\_bonatus  
Bos\_mutus  
Bos\_grunniens  
Bison\_bison  
Nesotragus\_moschatus  
Aepyceros\_melampus  
Pelea\_capreolus  
Redunca\_fulvorufula  
Redunca\_redunda  
Redunca\_arundinum  
Kobus\_megaceros  
Kobus\_leche  
Kobus\_vardonii  
Kobus\_kob  
Kobus\_ellipsiprymnus  
Ourebia\_ourebi  
Raphicerus\_melanotis  
Raphicerus\_sharpei  
Raphicerus\_campestris  
Madoqua\_kirkii  
Madoqua\_guentheri  
Saiga\_tatarica  
Nanger\_granti  
Eudorcas\_rufifrons  
Gazella\_dorcas  
Gazella\_gazella  
Gazella\_spekei  
Antilope\_cervicapra  
Litocranius\_walleri  
Antidorcas\_marsupialis  
Neotragus\_pygmaeus  
Oreotragus\_oreotragus  
Philantomba\_monticola  
Sylvicapra\_grimmia  
Cephalophus\_silvicultor  
Cephalophus\_dorsalis  
Cephalophus\_leucogaster  
Cephalophus\_nigrifrons  
Cephalophus\_natalensis  
Cephalophus\_weynsi  
Ovibos\_moschatus  
Capricornis\_crispus  
Ovis\_canadensis  
Ovis\_orientalis  
Ovis\_aries  
Ovis\_ammon  
Capra\_ibex  
Capra\_hircus  
Pseudois\_nayaur  
Myotragus\_balearicus  
Oreamnos\_americanus  
Rupicapra\_rupicapra  
Ammotragus\_lervia  
Connochaetes\_taurinus  
Connochaetes\_gnou

Damaliscus\_pygargus  
Damaliscus\_lunatus  
Beatragus\_hunteri  
Alcelaphus\_buselaphus  
Hippotragus\_niger  
Hippotragus\_equinus  
Oryx\_dammah  
Oryx\_leucoryx  
Oryx\_gazella  
Oryx\_beisa  
Rhinopoma\_hardwickii  
Rhinopoma\_microphyllum  
Lavia\_frons  
Megaderma\_spasma  
Rhinolophus\_hipposideros  
Asellia\_tridens  
Hipposideros\_caffer  
Hipposideros\_diadema  
Cynopterus\_titthaecheilus  
Cynopterus\_brachyotis  
Epomops\_franqueti  
Hypsignathus\_monstrosus  
Rousettus\_aegyptiacus  
Eidolon\_helvum  
Pteropus\_giganteus  
Pteropus\_rufus  
Pteropus\_vampyrus  
Macroglossus\_minimus  
Myzopoda\_aurita  
Mystacina\_tuberculata  
Thyroptera\_discifera  
Noctilio\_leporinus  
Pteronotus\_parnellii  
Mormoops\_megalophylla  
Micronycteris\_microtis  
Anoura\_caudifer  
Glossophaga\_soricina  
Glossophaga\_morenoi  
Phylloderma\_stenops  
Phyllostomus\_discolor  
Lonchorhina\_inusitata  
Chrotopterus\_auritus  
Vampyrum\_spectrum  
Lonchophylla\_inexpectata  
Carollia\_perspicillata  
Artibeus\_jamaicensis  
Artibeus\_planirostris  
Pygoderma\_bilabiatum  
Vampyressa\_pusilla  
Sturnira\_erythromos  
Sturnira\_aratathomasi  
Rhinophylla\_pumilio  
Lonchorhina\_orinocensis  
Lonchorhina\_fernandezi  
Lonchorhina\_marinkellei  
Lonchorhina\_aurita  
Diphylla\_ecaudata  
Desmodus\_rotundus



Diaemus\_youngi  
Macrotus\_waterhousii  
Macrotus\_californicus  
Nyctinomops\_macrotis  
Molossus\_molossus  
Promops\_nasutus  
Molossops\_temminckii  
Cynomops\_planirostris  
Eumops\_perotis  
Tadarida\_brasiliensis  
Molossus\_currentium  
Myotis\_daubentonii  
Myotis\_keaysi  
Myotis\_velifer  
Myotis\_chiloensis  
Myotis\_lucifugus  
Myotis\_evotis  
Eptesicus\_nilssonii  
Eptesicus\_serotinus  
Histiotus\_montanus  
Histiotus\_magellanicus  
Eptesicus\_diminutus  
Lasionycteris\_noctivagans  
Pipistrellus\_pipistrellus  
Nyctalus\_noctula  
Vespertilio\_murinus  
Chalinolobus\_tuberculatus  
Neoromicia\_nana  
Lasiurus\_cinereus  
Lasiurus\_ega  
Antrozous\_pallidus  
Otonycteris\_hemprichii  
Plecotus\_auritus  
Euderma\_maculatum  
Barbastella\_barbastellus  
Miniopterus\_schreibersii  
Nycteris\_javanica  
Nycteris\_thebaica  
Saccopteryx\_bilineata  
Peropteryx\_leucoptera  
Balantiopteryx\_plicata  
Galeopterus\_variegatus  
Cynocephalus\_volans  
Nycticebus\_coucang  
Loris\_tardigradus  
Otolemur\_garnettii  
Otolemur\_crassicaudatus  
Galago\_senegalensis  
Euoticus\_elegantulus  
Perodicticus\_potto  
Arctocebus\_calabarensis  
Daubentonia\_madagascariensis  
Indri\_indri  
Propithecus\_diadema  
Propithecus\_verreauxi  
Propithecus\_coquereli  
Avahi\_laniger  
Varecia\_variegata

Lemur\_catta  
Hapalemur\_griseus  
Eulemur\_macaco  
Eulemur\_rubriventer  
Eulemur\_mongoz  
Eulemur\_collaris  
Eulemur\_fulvus  
Eulemur\_sanfordi  
Eulemur\_albifrons  
Lepilemur\_mustelinus  
Cheirogaleus\_medius  
Microcebus\_murinus  
Microcebus\_rufus  
Tarsius\_syrichtha  
Pithecia\_irrorata  
Pithecia\_monachus  
Pithecia\_pithecia  
Cacajao\_melanocephalus  
Callicebus\_moloch  
Leontocebus\_nigricollis  
Saguinus\_oedipus  
Leontopithecus\_rosalia  
Mico\_humeralifer  
Callithrix\_jacchus  
Cebuella\_pygmaea  
Saimiri\_sciureus  
Cebus\_olivaceus  
Cebus\_albifrons  
Cebus\_capucinus  
Aotus\_azarae  
Aotus\_nancymae  
Alouatta\_seniculus  
Alouatta\_caraya  
Alouatta\_palliata  
Alouatta\_pigra  
Lagothrix\_lagotricha  
Brachyteles\_hypoxanthus  
Brachyteles\_arachnoides  
Ateles\_geoffroyi  
Ateles\_fusciceps  
Ateles\_paniscus  
Ateles\_chamek  
Ateles\_belzebuth  
Symphalangus\_syndactylus  
Hylobates\_pileatus  
Hylobates\_lar  
Hylobates\_muelleri  
Hylobates\_moloch  
Hylobates\_klossii  
Hylobates\_agilis  
Nomascus\_concolor  
Nomascus\_gabriellae  
Nomascus\_leucogenys  
Hoolock\_hoolock  
Pongo\_pygmaeus  
Pongo\_abelii  
Pan\_troglodytes  
Pan\_paniscus

Homo\_sapiens  
Gorilla\_gorilla  
Gorilla\_beringei  
Semnopithecus\_schistaceus  
Trachypithecus\_cristatus  
Trachypithecus\_phayrei  
Semnopithecus\_entellus  
Presbytis\_rubicunda  
Presbytis\_melalophos  
Rhinopithecus\_bieti  
Rhinopithecus\_roxellana  
Nasalis\_larvatus  
Colobus\_guereza  
Colobus\_vellerosus  
Macaca\_leonina  
Macaca\_sinica  
Macaca\_silenus  
Macaca\_nemestrina  
Macaca\_maura  
Macaca\_radiata  
Macaca\_fascicularis  
Macaca\_arctoides  
Macaca\_nigra  
Macaca\_fuscata  
Macaca\_mulatta  
Macaca\_sylvanus  
Theropithecus\_gelada  
Papio\_cynocephalus  
Papio\_papio  
Papio\_hamadryas  
Papio\_anubis  
Lophocebus\_aterrimus  
Lophocebus\_albigena  
Cercocebus\_atys  
Mandrillus\_sphinx  
Mandrillus\_leucophaeus  
Cercopithecus\_mitis  
Cercopithecus\_ascanius  
Erythrocebus\_patas  
Chlorocebus\_pygerythrus  
Chlorocebus\_aethiops  
Chlorocebus\_cynosuros  
Chlorocebus\_sabaeus  
Miopithecus\_talapoin  
Ptilocercus\_lowii  
Tupaia\_glis  
Tupaia\_nicobarica  
Urogale\_everetti  
Tupaia\_tana  
Dendrogale\_melanura  
Anathana\_elliotti  
Sylvilagus\_audubonii  
Oryctolagus\_cuniculus  
Pentalagus\_furnessi  
Lepus\_californicus  
Lepus\_alleni  
Lepus\_townsendii  
Lepus\_timidus

Lepus\_europaeus  
Lepus\_americanus  
Nesolagus\_timminsi  
Nesolagus\_netscheri  
Ochotona\_hyperborea  
Ochotona\_princeps  
Muscardinus\_avellanarius  
Aplodontia\_rufa  
Ratufa\_indica  
Callosciurus\_erythraeus  
Tamias\_striatus  
Tamias\_minimus  
Spermophilus\_dauricus  
Ictidomys\_tridecemlineatus  
Cynomys\_ludovicianus  
Marmota\_monax  
Marmota\_caligata  
Marmota\_marmota  
Marmota\_sibirica  
Sciurus\_anomalus  
Sciurus\_niger  
Sciurus\_carolinensis  
Sciurus\_griseus  
Microsciurus\_mimulus  
Microsciurus\_alfari  
Microsciurus\_flaviventer  
Sciurus\_vulgaris  
Tamiasciurus\_hudsonicus  
Glaucmys\_volans  
Petaurista\_leucogenys  
Petaurista\_philippensis  
Petaurista\_alborufus  
Petaurista\_grandis  
Laonastes\_aenigmamus  
Atherurus\_macrourus  
Hystrix\_javanica  
Hystrix\_cristata  
Thryonomys\_swinderianus  
Heterocephalus\_glaber  
Heliophobius\_argenteocinereus  
Cryptomys\_hottentotus  
Georchus\_capensis  
Bathyergus\_suillus  
Cuniculus\_paca  
Myoprocta\_acouchy  
Dasyprocta\_leporina  
Dasyprocta\_azarae  
Hydrochoerus\_hydrochaeris  
Dolichotis\_patagonum  
Cavia\_porcellus  
Cavia\_aperea  
Erethizon\_dorsatum  
Coendou\_prehensilis  
Lagostomus\_maximus  
Chinchilla\_lanigera  
Chinchilla\_chinchilla  
Phyllomys\_sulinus  
Myocastor\_coypus

Capromys\_pilorides  
Ctenomys\_boliviensis  
Ctenomys\_talarum  
Octodon\_degus  
Spalacopus\_cyanus  
Dipus\_sagitta  
Jaculus\_orientalis  
Jaculus\_jaculus  
Stylodipus\_telum  
Allactaga\_euphratica  
Allactaga\_major  
Zapus\_princeps  
Sicista\_concolor  
Spalax\_leucodon  
Rhizomys\_pruinosus  
Dicrostonyx\_groenlandicus  
Ondatra\_zibethicus  
Lemmus\_sibiricus  
Synaptomys\_cooperi  
Ellobius\_talpinus  
Microtus\_arvalis  
Microtus\_pennsylvanicus  
Microtus\_ochrogaster  
Microtus\_chrotorrhinus  
Microtus\_oeconomus  
Myodes\_gapperi  
Mesocricetus\_auratus  
Tscherskia\_triton  
Cricetus\_cricetus  
Cricetulus\_migratorius  
Cricetulus\_longicaudatus  
Cricetulus\_barabensis  
Phodopus\_sungorus  
Neotoma\_fuscipes  
Neotoma\_lepida  
Neotoma\_floridana  
Neotoma\_albigula  
Neotoma\_mexicana  
Neotoma\_cinerea  
Hodomys\_alleni  
Nelsonia\_neotomodon  
Xenomys\_nelsoni  
Ochrotomys\_nuttalli  
Reithrodontomys\_creper  
Reithrodontomys\_mexicanus  
Reithrodontomys\_fulvescens  
Reithrodontomys\_sumichrasti  
Reithrodontomys\_megalotis  
Reithrodontomys\_humulis  
Reithrodontomys\_montanus  
Isthmomys\_pirrensis  
Isthmomys\_flavidus  
Onychomys\_torridus  
Onychomys\_leucogaster  
Peromyscus\_maniculatus  
Peromyscus\_leucopus  
Megadontomys\_thomasi  
Peromyscus\_yucatanicus

Peromyscus\_guatemalensis  
Peromyscus\_mexicanus  
Peromyscus\_megalops  
Peromyscus\_melanophrys  
Habromys\_lepturus  
Habromys\_lophurus  
Peromyscus\_crinitus  
Peromyscus\_ochraventer  
Peromyscus\_truei  
Peromyscus\_difficilis  
Peromyscus\_attwateri  
Peromyscus\_furvus  
Peromyscus\_spicilegus  
Peromyscus\_boyllii  
Podomys\_floridanus  
Neotomodon\_alstoni  
Peromyscus\_californicus  
Peromyscus\_eremicus  
Osgoodomys\_banderanus  
Scotinomys\_xerampelinus  
Scotinomys\_teguina  
Baiomys\_taylori  
Baiomys\_musculus  
Tylomys\_panamensis  
Tylomys\_mirae  
Tylomys\_watsoni  
Tylomys\_fulviventer  
Tylomys\_nudicaudus  
Ototylomys\_phyllotis  
Nyctomys\_sumichrasti  
Chibchanomys\_trichotis  
Reithrodon\_auritus  
Rheomys\_underwoodi  
Rheomys\_thomasi  
Rheomys\_mexicanus  
Rheomys\_raptor  
Ichthyomys\_pittieri  
Ichthyomys\_hydrobates  
Ichthyomys\_tweedii  
Neusticomys\_venezuelae  
Neusticomys\_ferreirai  
Neusticomys\_monticolus  
Anotomys\_leander  
Chinchillula\_sahamae  
Sigmodon\_leucotis  
Sigmodon\_fulviventer  
Sigmodon\_alleni  
Sigmodon\_ochrognathus  
Sigmodon\_hispidus  
Rhipidomys\_macconnelli  
Rhipidomys\_nitela  
Rhipidomys\_mastacalis  
Rhipidomys\_fulviventer  
Rhipidomys\_venustus  
Rhipidomys\_couesi  
Rhipidomys\_venezuelae  
Rhipidomys\_latimanus  
Rhipidomys\_austrinus

Aepeomys\_lugens  
Thomasomys\_gracilis  
Thomasomys\_cinereus  
Thomasomys\_rhoadsi  
Thomasomys\_baeops  
Thomasomys\_aureus  
Thomasomys\_pyrrhonotus  
Thomasomys\_daphne  
Thomasomys\_oreas  
Thomasomys\_hylophilus  
Thomasomys\_paramorum  
Chilomys\_instans  
Akodon\_bogotensis  
Blarinomys\_breviceps  
Scapteromys\_tumidus  
Scapteromys\_meridionalis  
Scapteromys\_aquaticus  
Kunsia\_tomentosus  
Thalpomys\_lasiotis  
Necromys\_amoenus  
Necromys\_urichi  
Necromys\_lasiurus  
Necromys\_temchuki  
Necromys\_obscurus  
Necromys\_lactens  
Akodon\_mimus  
Akodon\_azarae  
Akodon\_boliviensis  
Akodon\_subfuscus  
Akodon\_lutescens  
Akodon\_cursor  
Akodon\_simulator  
Akodon\_albiventer  
Akodon\_mollis  
Akodon\_torques  
Akodon\_aerosus  
Deltamys\_kempi  
Thaptomys\_nigrita  
Oxymycterus\_delator  
Oxymycterus\_paramensis  
Oxymycterus\_rufus  
Oxymycterus\_inca  
Zygodontomys\_brevicauda  
Oecomys\_concolor  
Oecomys\_roberti  
Oecomys\_bicolor  
Oecomys\_superans  
Oecomys\_trinitatis  
Oecomys\_mamorae  
Oecomys\_paricola  
Transandinomys\_talamancae  
Transandinomys\_bolivaris  
Euryoryzomys\_nitidus  
Euryoryzomys\_russatus  
Euryoryzomys\_legatus  
Nephelomys\_albigularis  
Nephelomys\_keaysi  
Hylaeamys\_megacephalus

Handleyomys\_alfaroi  
Handleyomys\_melanotis  
Handleyomys\_chapmani  
Neacomys\_guianae  
Neacomys\_spinosus  
Neacomys\_tenuipes  
Microryzomys\_minutus  
Microryzomys\_altissimus  
Oligoryzomys\_microtis  
Oligoryzomys\_nigripes  
Oligoryzomys\_destructor  
Oligoryzomys\_fulvescens  
Oligoryzomys\_eliurus  
Oligoryzomys\_delticola  
Oligoryzomys\_chacoensis  
Oligoryzomys\_andinus  
Oligoryzomys\_magellanicus  
Oligoryzomys\_longicaudatus  
Oligoryzomys\_flavescens  
Eremoryzomys\_polius  
Cerradomys\_subflavus  
Sooretamys\_angouya  
Holochilus\_brasiliensis  
Holochilus\_chacarius  
Pseudoryzomys\_simplex  
Lundomys\_molitor  
Nectomys\_squamipes  
Oryzomys\_couesi  
Oryzomys\_palustris  
Sigmodontomys\_alfari  
Melanomys\_caliginosus  
Nesoryzomys\_indefessus  
Irenomys\_tarsalis  
Euneomys\_petersoni  
Euneomys\_chinchilloides  
Andinomys\_edax  
Punomys\_kofordi  
Delomys\_sublineatus  
Delomys\_dorsalis  
Calomys\_lepidus  
Calomys\_sorellus  
Calomys\_musculus  
Calomys\_laucha  
Calomys\_tener  
Calomys\_boliviae  
Calomys\_callosus  
Calomys\_venustus  
Calomys\_hummelincki  
Eligmodontia\_morgani  
Eligmodontia\_puerulus  
Eligmodontia\_moreni  
Eligmodontia\_hirtipes  
Eligmodontia\_bolsonensis  
Graomys\_griseoflavus  
Graomys\_domorum  
Andalgalomys\_pearsoni  
Andalgalomys\_olrogi  
Salinomys\_delicatus



Phyllotis\_wolffsohni  
Tapecomys\_primus  
Auliscomys\_sublimis  
Auliscomys\_pictus  
Auliscomys\_boliviensis  
Galenomys\_garleppi  
Loxodontomys\_micropus  
Phyllotis\_osilae  
Phyllotis\_alisosiensis  
Phyllotis\_anitae  
Phyllotis\_caprinus  
Phyllotis\_xanthopygus  
Phyllotis\_darwini  
Phyllotis\_amicus  
Paralomys\_gerbillus  
Phyllotis\_haggardi  
Phyllotis\_andium  
Calassomys\_apicalis  
Akodon\_neocenus  
Wiedomys\_pyrrhorhinos  
Juliomys\_pictipes  
Abrothrix\_olivaceus  
Abrothrix\_andinus  
Abrothrix\_jelskii  
Abrothrix\_illuteus  
Abrothrix\_longipilis  
Abrothrix\_sanborni  
Notiomys\_edwardsii  
Geoxus\_valdivianus  
Chelemys\_macronyx  
Mystromys\_albicaudatus  
Saccostomus\_campestris  
Beamys\_hindei  
Cricetomys\_gambianus  
Brachytarsomys\_albicauda  
Gymnuromys\_roberti  
Eliurus\_myoxinus  
Brachyuromys\_ramirohitra  
Nesomys\_rufus  
Nesomys\_audeberti  
Macrotarsomys\_bastardi  
Calomyscus\_baluchi  
Lophiomys\_imhausi  
Pachyuromys\_duprasi  
Psammomys\_obesus  
Meriones\_shawi  
Meriones\_unguiculatus  
Sekeetamys\_calurus  
Ammodillus\_imbellis  
Microdillus\_peeli  
Gerbillus\_cheesmani  
Taterillus\_arenarius  
Gerbilliscus\_nigricaudus  
Gerbillurus\_setzeri  
Desmodillus\_auricularis  
Tatera\_indica  
Notomys\_amplus  
Conilurus\_albipes

Hydromys\_chrysogaster  
Mastomys\_coucha  
Mus\_musculus  
Rhabdomys\_pumilio  
Micromys\_minutus  
Maxomys\_inflatus  
Rattus\_rattus  
Rattus\_fuscipes  
Rattus\_norvegicus  
Pedetes\_surdaster  
Pedetes\_capensis  
Anomalurus\_pelii  
Anomalurus\_derbianus  
Anomalurus\_beecrofti  
Anomalurus\_pusillus  
Microdipodops\_pallidus  
Dipodomys\_spectabilis  
Dipodomys\_ordii  
Dipodomys\_heermanni  
Dipodomys\_merriami  
Thomomys\_bulbivorus  
Thomomys\_umbrinus  
Thomomys\_bottae  
Geomys\_pinetis  
Geomys\_bursarius  
Geomys\_arenarius  
Cratogeomys\_castanops  
Liomys\_salvini  
Heteromys\_anomalus  
Perognathus\_fasciatus  
Castor\_fiber  
Castor\_canadensis  
Hydrodamalis\_gigas  
Trichechus\_manatus  
Trichechus\_senegalensis  
Trichechus\_inunguis  
Dugong\_dugon  
Loxodonta\_africana  
Elephas\_maximus  
Procavia\_capensis  
Heterohyrax\_brucei  
Dendrohyrax\_validus  
Dendrohyrax\_dorsalis  
Dendrohyrax\_arboreus  
Orycteropus\_afer  
Rhynchocyon\_cirnei  
Rhynchocyon\_chrysopygus  
Rhynchocyon\_petersi  
Elephantulus\_myurus  
Elephantulus\_edwardii  
Macroscelides\_proboscideus  
Petrodromus\_tetradactylus  
Elephantulus\_rufescens  
Elephantulus\_brachyrhynchus  
Elephantulus\_intufi  
Elephantulus\_rupestris  
Potamogale\_velox  
Limnogale\_mergulus

Microgale\_talazaci  
Microgale\_longicaudata  
Microgale\_cowani  
Oryzorictes\_tetradactylus  
Tenrec\_ecaudatus  
Hemicentetes\_semispinosus  
Setifer\_setosus  
Echinops\_telfairi  
Eremitalpa\_granti  
Amblysomus\_hottentotus  
Calcochloris\_obtusirostris  
Chrysospalax\_trevelyani  
Chrysochloris\_asiatica  
Dasypus\_hybridus  
Dasypus\_novemcinctus  
Dasypus\_kappleri  
Dasypus\_septemcinctus  
Zaedyus\_pichiy  
Euphractus\_sexcinctus  
Chaetophractus\_vellerosus  
Chaetophractus\_villosus  
Chlamyphorus\_truncatus  
Tolypeutes\_matacus  
Priodontes\_maximus  
Cabassous\_unicinctus  
Tamandua\_tetradactyla  
Tamandua\_mexicana  
Myrmecophaga\_tridactyla  
Cyclopes\_didactylus  
Choloepus\_hoffmanni  
Choloepus\_didactylus  
Bradypus\_tridactylus  
Bradypus\_variegatus  
Rhincholestes\_raphanurus  
Caenolestes\_fuliginosus  
Glironia\_venusta  
Monodelphis\_domestica  
Gracilinanus\_microtarsus  
Metachirus\_nudicaudatus  
Didelphis\_virginiana  
Didelphis\_marsupialis  
Didelphis\_albiventris  
Chironectes\_minimus  
Caluromys\_philander  
Dromiciops\_gliroides  
Notoryctes\_typhlops  
Notoryctes\_caurinus  
Macrotis\_lagotis  
Isodon\_macrourus  
Isodon\_obesulus  
Perameles\_gunnii  
Perameles\_nasuta  
Sarcophilus\_harrisii  
Dasyurus\_maculatus  
Dasyurus\_viverrinus  
Dasyuroides\_byrnei  
Dasycercus\_cristicauda  
Antechinus\_flavipes

Thylacinus\_cynocephalus  
Myrmecobius\_fasciatus  
Phascolarctos\_cinereus  
Vombatus\_ursinus  
Lasiorhinus\_latifrons  
Cercartetus\_concinnus  
Trichosurus\_vulpecula  
Spilocuscus\_maculatus  
Phalanger\_sericeus  
Phalanger\_orientalis  
Hypsiprymnodon\_moschatus  
Thylogale\_billardierii  
Petrogale\_lateralis  
Petrogale\_penicillata  
Dendrolagus\_goodfellowi  
Dendrolagus\_matschiei  
Dendrolagus\_bennettianus  
Dendrolagus\_lumholtzi  
Macropus\_fuliginosus  
Macropus\_giganteus  
Macropus\_antilopinus  
Macropus\_robustus  
Macropus\_rufus  
Macropus\_rufogriseus  
Macropus\_eugenii  
Macropus\_agilis  
Macropus\_parryi  
Macropus\_parma  
Macropus\_irma  
Dendrolagus\_ursinus  
Potorous\_longipes  
Potorous\_tridactylus  
Bettongia\_penicillata  
Bettongia\_gaimardi  
Aepyprymnus\_rufescens  
Pseudocheirus\_peregrinus  
Petauroides\_volans  
Petaurus\_australis  
Petaurus\_norfolcensis  
Petaurus\_breviceps

;  
END;  
BEGIN TREES;  
  TRANSLATE  
    1    Zaglossus\_bruijnii,  
    2    Tachyglossus\_aculeatus,  
    3    Ornithorhynchus\_anatinus,  
    4    Solenodon\_paradoxus,  
    5    Solenodon\_cubanus,  
    6    Galemys\_pyrenaicus,  
    7    Scapanus\_latimanus,  
    8    Scalopus\_aquaticus,  
    9    Talpa\_europaea,  
   10    Euroscaptor\_mizura,  
   11    Euroscaptor\_micrura,  
   12    Mogera\_tokudae,  
   13    Mogera\_imaizumii,  
   14    Mogera\_wogura,

15 Euroscaptor\_subanura,  
16 Condylura\_cristata,  
17 Hylomys\_suillus,  
18 Echinorex\_gymnura,  
19 Erinaceus\_europaeus,  
20 Paraechinus\_micropus,  
21 Hemiechinus\_auritus,  
22 Atelerix\_algirus,  
23 Scutisorex\_somereni,  
24 Suncus\_madagascariensis,  
25 Crocidura\_crenata,  
26 Crocidura\_canariensis,  
27 Sorex\_araneus,  
28 Sorex\_minutus,  
29 Cryptotis\_parva,  
30 Blarina\_hylophaga,  
31 Notiosorex\_crawfordi,  
32 Smutsia\_gigantea,  
33 Phataginus\_tricuspis,  
34 Manis\_pentadactyla,  
35 Urocyon\_cinereoargenteus,  
36 Vulpes\_lagopus,  
37 Vulpes\_zerda,  
38 Vulpes\_vulpes,  
39 Otocyon\_megalotis,  
40 Nyctereutes\_procyonoides,  
41 Lycaon\_pictus,  
42 Chrysocyon\_brachyurus,  
43 Canis\_mesomelas,  
44 Canis\_simensis,  
45 Canis\_latrans,  
46 Canis\_aureus,  
47 Canis\_lupus,  
48 Cuon\_alpinus,  
49 Canis\_adustus,  
50 Pseudalopex\_gymnocercus,  
51 Speothos\_venaticus,  
52 Cerdocyon\_thous,  
53 Neomonachus\_tropicalis,  
54 Monachus\_monachus,  
55 Mirounga\_leonina,  
56 Mirounga\_angustirostris,  
57 Lobodon\_carcinophaga,  
58 Leptonychotes\_weddellii,  
59 Ommatophoca\_rossii,  
60 Hydrurga\_leptonyx,  
61 Erignathus\_barbatus,  
62 Pagophilus\_groenlandicus,  
63 Phoca\_vitulina,  
64 Pusa\_hispida,  
65 Halichoerus\_grypus,  
66 Cystophora\_cristata,  
67 Odobenus\_rosmarus,  
68 Callorhinus\_ursinus,  
69 Zalophus\_californianus,  
70 Zalophus\_japonicus,  
71 Eumetopias\_jubatus,  
72 Arctocephalus\_pusillus,

73 Neophoca\_cinerea,  
74 Otaria\_bryonia,  
75 Arctocephalus\_tropicalis,  
76 Arctocephalus\_forsteri,  
77 Arctocephalus\_australis,  
78 Mydaus\_javanensis,  
79 Spilogale\_gracilis,  
80 Mephitis\_mephitis,  
81 Conepatus\_humboldtii,  
82 Conepatus\_chinga,  
83 Potos\_flavus,  
84 Procyon\_lotor,  
85 Procyon\_cancrivorus,  
86 Bassariscus\_astutus,  
87 Nasua\_nasua,  
88 Nasua\_narica,  
89 Bassaricyon\_alleni,  
90 Taxidea\_taxus,  
91 Meles\_meles,  
92 Meles\_anakuma,  
93 Arctonyx\_collaris,  
94 Mellivora\_capensis,  
95 Gulo\_gulo,  
96 Martes\_flavigula,  
97 Martes\_foina,  
98 Martes\_zibellina,  
99 Martes\_martes,  
100 Martes\_americana,  
101 Martes\_pennanti,  
102 Eira\_barbara,  
103 Melogale\_orientalis,  
104 Neovison\_vison,  
105 Mustela\_frenata,  
106 Mustela\_felipei,  
107 Mustela\_erminea,  
108 Mustela\_nivalis,  
109 Mustela\_sibirica,  
110 Mustela\_nigripes,  
111 Mustela\_lutreolina,  
112 Mustela\_putorius,  
113 Ictonyx\_libyca,  
114 Galictis\_vittata,  
115 Lyncodon\_patagonicus,  
116 Galictis\_cuja,  
117 Pteronura\_brasiliensis,  
118 Lontra\_longicaudis,  
119 Lontra\_provocax,  
120 Lontra\_canadensis,  
121 Enhydra\_lutris,  
122 Lutra\_maculicollis,  
123 Lutra\_lutra,  
124 Aonyx\_cinerea,  
125 Lutrogale\_perspicillata,  
126 Aonyx\_capensis,  
127 Ailurus\_fulgens,  
128 Ursus\_maritimus,  
129 Ursus\_arctos,  
130 Melursus\_ursinus,

131 *Ursus\_thibetanus,*  
132 *Ursus\_americanus,*  
133 *Helarctos\_malayanus,*  
134 *Ailuropoda\_melanoleuca,*  
135 *Nandinia\_binotata,*  
136 *Hyaena\_hyaena,*  
137 *Hyaena\_brunnea,*  
138 *Proteles\_cristata,*  
139 *Crocuta\_crocuta,*  
140 *Eupleres\_goudotii,*  
141 *Salanoia\_concolor,*  
142 *Galidictis\_fasciata,*  
143 *Galidia\_elegans,*  
144 *Cryptoprocta\_ferox,*  
145 *Herpestes\_vitticollis,*  
146 *Herpestes\_javanicus,*  
147 *Herpestes\_edwardsii,*  
148 *Herpestes\_ichneumon,*  
149 *Ichneumia\_albicauda,*  
150 *Cynictis\_penicillata,*  
151 *Bdeogale\_crassicauda,*  
152 *Crossarchus\_obscurus,*  
153 *Helogale\_parvula,*  
154 *Liberiictis\_kuhni,*  
155 *Mungos\_mungo,*  
156 *Suricata\_suricatta,*  
157 *Genetta\_maculata,*  
158 *Genetta\_tigrina,*  
159 *Genetta\_genetta,*  
160 *Genetta\_servalina,*  
161 *Viverricula\_indica,*  
162 *Viverra\_tangalunga,*  
163 *Viverra\_zibetha,*  
164 *Civettictis\_civetta,*  
165 *Macrogalidia\_musschenbroekii,*  
166 *Cynogale\_bennettii,*  
167 *Hemigalus\_derbyanus,*  
168 *Paradoxurus\_hermaphroditus,*  
169 *Arctictis\_binturong,*  
170 *Prionodon\_pardicolor,*  
171 *Prionodon\_linsang,*  
172 *Neofelis\_nebulosa,*  
173 *Panthera\_tigris,*  
174 *Panthera\_onca,*  
175 *Panthera\_uncia,*  
176 *Panthera\_pardus,*  
177 *Panthera\_leo,*  
178 *Lynx\_rufus,*  
179 *Lynx\_lynx,*  
180 *Lynx\_canadensis,*  
181 *Acinonyx\_jubatus,*  
182 *Puma\_concolor,*  
183 *Felis\_catus,*  
184 *Felis\_silvestris,*  
185 *Leopardus\_pardalis,*  
186 *Leopardus\_wiedii,*  
187 *Leopardus\_tigrinus,*  
188 *Prionailurus\_bengalensis,*

189 Leptailurus\_serval,  
190 Caracal\_caracal,  
191 Equus\_africanus,  
192 Equus\_grevyi,  
193 Equus\_quagga,  
194 Equus\_zebra,  
195 Equus\_hemionus,  
196 Equus\_caballus,  
197 Equus\_ferus,  
198 Tapirus\_indicus,  
199 Tapirus\_terrestris,  
200 Tapirus\_bairdii,  
201 Rhinoceros\_unicornis,  
202 Rhinoceros\_sondaicus,  
203 Dicerorhinus\_sumatrensis,  
204 Diceros\_bicornis,  
205 Ceratotherium\_simum,  
206 Vicugna\_pacos,  
207 Vicugna\_vicugna,  
208 Lama\_glama,  
209 Camelus\_dromedarius,  
210 Camelus\_ferus,  
211 Tayassu\_pecari,  
212 Pecari\_tajacu,  
213 Sus\_scrofa,  
214 Sus\_barbatus,  
215 Potamochoerus\_porcus,  
216 Phacochoerus\_africanus,  
217 Phacochoerus\_aethiopicus,  
218 Hylochoerus\_meinertzhageni,  
219 Babyrousa\_babyrussa,  
220 Hippopotamus\_amphibius,  
221 Choeropsis\_liberiensis,  
222 Indopacetus\_pacificus,  
223 Kogia\_sima,  
224 Kogia\_breviceps,  
225 Physeter\_macrocephalus,  
226 Platanista\_gangetica,  
227 Pontoporia\_blainvillei,  
228 Inia\_geoffrensis,  
229 Inia\_araguaiaensis,  
230 Lipotes\_vexillifer,  
231 Delphinapterus\_leucas,  
232 Mesoplodon\_bowdoini,  
233 Monodon\_monoceros,  
234 Neophocaena\_phocaenoides,  
235 Phocoenoides\_dalli,  
236 Phocoena\_phocoena,  
237 Phocoena\_spinipinnis,  
238 Phocoena\_dioptrica,  
239 Lagenorhynchus\_acutus,  
240 Lagenorhynchus\_albirostris,  
241 Orcinus\_orca,  
242 Orcaella\_brevirostris,  
243 Grampus\_griseus,  
244 Pseudorca\_crassidens,  
245 Peponocephala\_electra,  
246 Globicephala\_melas,



247 Globicephala\_macrorhynchus,  
248 Feresa\_attenuata,  
249 Steno\_bredanensis,  
250 Sotalia\_guianensis,  
251 Sotalia\_fluviatilis,  
252 Tursiops\_truncatus,  
253 Stenella\_attenuata,  
254 Lagenodelphis\_hosei,  
255 Stenella\_longirostris,  
256 Sousa\_chinensis,  
257 Tursiops\_aduncus,  
258 Stenella\_frontalis,  
259 Stenella\_coeruleoalba,  
260 Stenella\_clymene,  
261 Delphinus\_delphis,  
262 Delphinus\_capensis,  
263 Lagenorhynchus\_obscurus,  
264 Lagenorhynchus\_obliquidens,  
265 Lagenorhynchus\_cruciger,  
266 Lagenorhynchus\_australis,  
267 Cephalorhynchus\_hectori,  
268 Cephalorhynchus\_heavisidii,  
269 Cephalorhynchus\_eutropia,  
270 Cephalorhynchus\_commersonii,  
271 Berardius\_bairdii,  
272 Berardius\_arnuxii,  
273 Mesoplodon\_bidens,  
274 Ziphius\_cavirostris,  
275 Mesoplodon\_stejnegeri,  
276 Hyperoodon\_planifrons,  
277 Hyperoodon\_ampullatus,  
278 Mesoplodon\_hectori,  
279 Mesoplodon\_carlhubbsi,  
280 Mesoplodon\_layardii,  
281 Mesoplodon\_mirus,  
282 Mesoplodon\_europaeus,  
283 Mesoplodon\_densirostris,  
284 Mesoplodon\_grayi,  
285 Tasmacetus\_shepherdi,  
286 Eubalaena\_glacialis,  
287 Eubalaena\_japonica,  
288 Balaenoptera\_physalus,  
289 Balaenoptera\_musculus,  
290 Balaenoptera\_omurai,  
291 Balaenoptera\_borealis,  
292 Balaenoptera\_edeni,  
293 Mesoplodon\_perrini,  
294 Balaenoptera\_bonaerensis,  
295 Mesoplodon\_peruvianus,  
296 Lissodelphis\_peronii,  
297 Lissodelphis\_borealis,  
298 Balaena\_mysticetus,  
299 Caperea\_marginata,  
300 Balaenoptera\_acutorostrata,  
301 Mesoplodon\_ginkgodens,  
302 Megaptera\_novaeangliae,  
303 Eschrichtius\_robustus,  
304 Moschiola\_meminna,

305 *Moschiola indica*,  
306 *Tragulus javanicus*,  
307 *Tragulus kanchil*,  
308 *Tragulus napu*,  
309 *Okapia johnstoni*,  
310 *Giraffa camelopardalis*,  
311 *Antilocapra americana*,  
312 *Muntiacus muntjak*,  
313 *Dama dama*,  
314 *Elaphurus davidianus*,  
315 *Rusa unicolor*,  
316 *Cervus elaphus*,  
317 *Axis calamianensis*,  
318 *Axis axis*,  
319 *Rangifer tarandus*,  
320 *Odocoileus virginianus*,  
321 *Odocoileus hemionus*,  
322 *Mazama gouazoubira*,  
323 *Blastocerus dichotomus*,  
324 *Pudu puda*,  
325 *Hydropotes inermis*,  
326 *Capreolus capreolus*,  
327 *Alces alces*,  
328 *Moschus moschiferus*,  
329 *Moschus berezovskii*,  
330 *Boselaphus tragocamelus*,  
331 *Tetracerus quadricornis*,  
332 *Tragelaphus imberbis*,  
333 *Tragelaphus angasii*,  
334 *Tragelaphus scriptus*,  
335 *Tragelaphus eurycerus*,  
336 *Tragelaphus spekii*,  
337 *Tragelaphus buxtoni*,  
338 *Tragelaphus strepsiceros*,  
339 *Syncerus caffer*,  
340 *Bubalus mindorensis*,  
341 *Bubalus depressicornis*,  
342 *Bubalus arnee*,  
343 *Bos gaurus*,  
344 *Bos taurus*,  
345 *Bos indicus*,  
346 *Bison bonasus*,  
347 *Bos mutus*,  
348 *Bos grunniens*,  
349 *Bison bison*,  
350 *Nesotragus moschatus*,  
351 *Aepyceros melampus*,  
352 *Pelea capreolus*,  
353 *Redunca fulvorufula*,  
354 *Redunca redunca*,  
355 *Redunca arundinum*,  
356 *Kobus megaceros*,  
357 *Kobus leche*,  
358 *Kobus vardonii*,  
359 *Kobus kob*,  
360 *Kobus ellipsiprymnus*,  
361 *Ourebia ourebi*,  
362 *Raphicerus melanotis*,

363 *Raphicerus sharpei*,  
364 *Raphicerus campestris*,  
365 *Madoqua kirkii*,  
366 *Madoqua guentheri*,  
367 *Saiga tatarica*,  
368 *Nanger granti*,  
369 *Eudorcas rufifrons*,  
370 *Gazella dorcas*,  
371 *Gazella gazella*,  
372 *Gazella spekei*,  
373 *Antilope cervicapra*,  
374 *Litocranius walleri*,  
375 *Antidorcas marsupialis*,  
376 *Neotragus pygmaeus*,  
377 *Oreotragus oreotragus*,  
378 *Philantomba monticola*,  
379 *Sylvicapra grimmia*,  
380 *Cephalophus silvicultor*,  
381 *Cephalophus dorsalis*,  
382 *Cephalophus leucogaster*,  
383 *Cephalophus nigrifrons*,  
384 *Cephalophus natalensis*,  
385 *Cephalophus weynsi*,  
386 *Ovibos moschatus*,  
387 *Capricornis crispus*,  
388 *Ovis canadensis*,  
389 *Ovis orientalis*,  
390 *Ovis aries*,  
391 *Ovis ammon*,  
392 *Capra ibex*,  
393 *Capra hircus*,  
394 *Pseudois nayaur*,  
395 *Myotragus balearicus*,  
396 *Oreamnos americanus*,  
397 *Rupicapra rupicapra*,  
398 *Ammotragus lervia*,  
399 *Connochaetes taurinus*,  
400 *Connochaetes gnou*,  
401 *Damaliscus pygargus*,  
402 *Damaliscus lunatus*,  
403 *Beatragus hunteri*,  
404 *Alcelaphus buselaphus*,  
405 *Hippotragus niger*,  
406 *Hippotragus equinus*,  
407 *Oryx dammah*,  
408 *Oryx leucoryx*,  
409 *Oryx gazella*,  
410 *Oryx beisa*,  
411 *Rhinopoma hardwickii*,  
412 *Rhinopoma microphyllum*,  
413 *Lavia frons*,  
414 *Megaderma spasma*,  
415 *Rhinolophus hipposideros*,  
416 *Asellia tridens*,  
417 *Hipposideros caffer*,  
418 *Hipposideros diadema*,  
419 *Cynopterus titthaechilus*,  
420 *Cynopterus brachyotis*,

421 *Epomops\_franqueti*,  
422 *Hypsignathus\_monstrosus*,  
423 *Rousettus\_aegyptiacus*,  
424 *Eidolon\_helvum*,  
425 *Pteropus\_giganteus*,  
426 *Pteropus\_rufus*,  
427 *Pteropus\_vampyrus*,  
428 *Macroglossus\_minimus*,  
429 *Myzopoda\_aurita*,  
430 *Mystacina\_tuberculata*,  
431 *Thyroptera\_discifera*,  
432 *Noctilio\_leporinus*,  
433 *Pteronotus\_parnellii*,  
434 *Mormoops\_megalophylla*,  
435 *Micronycteris\_microtis*,  
436 *Anoura\_caudifer*,  
437 *Glossophaga\_soricina*,  
438 *Glossophaga\_morenoi*,  
439 *Phylloderma\_stenops*,  
440 *Phyllostomus\_discolor*,  
441 *Lonchorhina\_inusitata*,  
442 *Chrotopterus\_auritus*,  
443 *Vampyrum\_spectrum*,  
444 *Lonchophylla\_inexpectata*,  
445 *Carollia\_perspicillata*,  
446 *Artibeus\_jamaicensis*,  
447 *Artibeus\_planirostris*,  
448 *Pygoderma\_bilabiatum*,  
449 *Vampyressa\_pusilla*,  
450 *Sturnira\_erythromos*,  
451 *Sturnira\_aratathomasi*,  
452 *Rhinophylla\_pumilio*,  
453 *Lonchorhina\_orinocensis*,  
454 *Lonchorhina\_fernandezi*,  
455 *Lonchorhina\_marinkellei*,  
456 *Lonchorhina\_aurita*,  
457 *Diphylla\_ecaudata*,  
458 *Desmodus\_rotundus*,  
459 *Diaemus\_youngi*,  
460 *Macrotus\_waterhousii*,  
461 *Macrotus\_californicus*,  
462 *Nyctinomops\_macrootis*,  
463 *Molossus\_molossus*,  
464 *Promops\_nasutus*,  
465 *Molossops\_temminckii*,  
466 *Cynomops\_planirostris*,  
467 *Eumops\_perotis*,  
468 *Tadarida\_brasiliensis*,  
469 *Molossus\_currentium*,  
470 *Myotis\_daubentonii*,  
471 *Myotis\_keaysi*,  
472 *Myotis\_velifer*,  
473 *Myotis\_chiloensis*,  
474 *Myotis\_lucifugus*,  
475 *Myotis\_evotis*,  
476 *Eptesicus\_nilssonii*,  
477 *Eptesicus\_serotinus*,  
478 *Histiotus\_montanus*,

479 *Histiotus\_magellanicus*,  
480 *Eptesicus\_diminutus*,  
481 *Lasionycteris\_noctivagans*,  
482 *Pipistrellus\_pipistrellus*,  
483 *Nyctalus\_noctula*,  
484 *Vespertilio\_murinus*,  
485 *Chalinolobus\_tuberculatus*,  
486 *Neoromicia\_nana*,  
487 *Lasiurus\_cinereus*,  
488 *Lasiurus\_ega*,  
489 *Antrozous\_pallidus*,  
490 *Otonycteris\_hemprichii*,  
491 *Plecotus\_auritus*,  
492 *Euderma\_maculatum*,  
493 *Barbastella\_barbastellus*,  
494 *Miniopterus\_schreibersii*,  
495 *Nycteris\_javanica*,  
496 *Nycteris\_thebaica*,  
497 *Saccopteryx\_bilineata*,  
498 *Peropteryx\_leucoptera*,  
499 *Balantiopteryx\_plicata*,  
500 *Galeopterus\_variegatus*,  
501 *Cynocephalus\_volans*,  
502 *Nycticebus\_coucang*,  
503 *Loris\_tardigradus*,  
504 *Otolemur\_garnettii*,  
505 *Otolemur\_crassicaudatus*,  
506 *Galago\_senegalensis*,  
507 *Euoticus\_elegantulus*,  
508 *Perodicticus\_potto*,  
509 *Arctocebus\_calabarensis*,  
510 *Daubentonia\_madagascariensis*,  
511 *Indri\_indri*,  
512 *Propithecus\_diadema*,  
513 *Propithecus\_verreauxi*,  
514 *Propithecus\_coquereli*,  
515 *Avahi\_laniger*,  
516 *Varecia\_variegata*,  
517 *Lemur\_catta*,  
518 *Hapalemur\_griseus*,  
519 *Eulemur\_macaco*,  
520 *Eulemur\_rubriventer*,  
521 *Eulemur\_mongoz*,  
522 *Eulemur\_collaris*,  
523 *Eulemur\_fulvus*,  
524 *Eulemur\_sanfordi*,  
525 *Eulemur\_albifrons*,  
526 *Lepilemur\_mustelinus*,  
527 *Cheirogaleus\_medius*,  
528 *Microcebus\_murinus*,  
529 *Microcebus\_rufus*,  
530 *Tarsius\_syrichta*,  
531 *Pithecia\_irrorata*,  
532 *Pithecia\_monachus*,  
533 *Pithecia\_pithecia*,  
534 *Cacajao\_melanocephalus*,  
535 *Callicebus\_moloch*,  
536 *Leontocebus\_nigricollis*,

537 *Saguinus oedipus*,  
538 *Leontopithecus rosalia*,  
539 *Mico humeralifer*,  
540 *Callithrix jacchus*,  
541 *Cebuella pygmaea*,  
542 *Saimiri sciureus*,  
543 *Cebus olivaceus*,  
544 *Cebus albifrons*,  
545 *Cebus capucinus*,  
546 *Aotus azarae*,  
547 *Aotus nancymae*,  
548 *Alouatta seniculus*,  
549 *Alouatta caraya*,  
550 *Alouatta palliata*,  
551 *Alouatta pigra*,  
552 *Lagothrix lagotricha*,  
553 *Brachyteles hypoxanthus*,  
554 *Brachyteles arachnoides*,  
555 *Ateles geoffroyi*,  
556 *Ateles fusciceps*,  
557 *Ateles paniscus*,  
558 *Ateles chamek*,  
559 *Ateles belzebuth*,  
560 *Symphalangus syndactylus*,  
561 *Hylobates pileatus*,  
562 *Hylobates lar*,  
563 *Hylobates muelleri*,  
564 *Hylobates moloch*,  
565 *Hylobates klossii*,  
566 *Hylobates agilis*,  
567 *Nomascus concolor*,  
568 *Nomascus gabriellae*,  
569 *Nomascus leucogenys*,  
570 *Hoolock hoolock*,  
571 *Pongo pygmaeus*,  
572 *Pongo abelii*,  
573 *Pan troglodytes*,  
574 *Pan paniscus*,  
575 *Homo sapiens*,  
576 *Gorilla gorilla*,  
577 *Gorilla beringei*,  
578 *Semnopithecus schistaceus*,  
579 *Trachypithecus cristatus*,  
580 *Trachypithecus phayrei*,  
581 *Semnopithecus entellus*,  
582 *Presbytis rubicunda*,  
583 *Presbytis melalophos*,  
584 *Rhinopithecus bieti*,  
585 *Rhinopithecus roxellana*,  
586 *Nasalis larvatus*,  
587 *Colobus guereza*,  
588 *Colobus vellerosus*,  
589 *Macaca leonina*,  
590 *Macaca sinica*,  
591 *Macaca silenus*,  
592 *Macaca nemestrina*,  
593 *Macaca maura*,  
594 *Macaca radiata*,

595 *Macaca\_fascicularis,*  
596 *Macaca\_arctoides,*  
597 *Macaca\_nigra,*  
598 *Macaca\_fuscata,*  
599 *Macaca\_mulatta,*  
600 *Macaca\_sylvanus,*  
601 *Theropithecus\_gelada,*  
602 *Papio\_cynocephalus,*  
603 *Papio\_papio,*  
604 *Papio\_hamadryas,*  
605 *Papio\_anubis,*  
606 *Lophocebus\_aterimus,*  
607 *Lophocebus\_albigena,*  
608 *Cercocebus\_atys,*  
609 *Mandrillus\_sphinx,*  
610 *Mandrillus\_leucophaeus,*  
611 *Cercopithecus\_mitis,*  
612 *Cercopithecus\_ascanius,*  
613 *Erythrocebus\_patas,*  
614 *Chlorocebus\_pygerythrus,*  
615 *Chlorocebus\_aethiops,*  
616 *Chlorocebus\_cynosuros,*  
617 *Chlorocebus\_sabaeus,*  
618 *Miopithecus\_talapoin,*  
619 *Ptilocercus\_lowii,*  
620 *Tupaia\_glis,*  
621 *Tupaia\_nicobarica,*  
622 *Urogale\_everetti,*  
623 *Tupaia\_tana,*  
624 *Dendrogale\_melanura,*  
625 *Anathana\_elliotti,*  
626 *Sylvilagus\_audubonii,*  
627 *Oryctolagus\_cuniculus,*  
628 *Pentalagus\_furnessi,*  
629 *Lepus\_californicus,*  
630 *Lepus\_alleni,*  
631 *Lepus\_townsendii,*  
632 *Lepus\_timidus,*  
633 *Lepus\_europaeus,*  
634 *Lepus\_americanus,*  
635 *Nesolagus\_timminsi,*  
636 *Nesolagus\_netscheri,*  
637 *Ochotona\_hyperborea,*  
638 *Ochotona\_princeps,*  
639 *Muscardinus\_avellanarius,*  
640 *Aplodontia\_rufa,*  
641 *Ratufa\_indica,*  
642 *Callosciurus\_erythraeus,*  
643 *Tamias\_striatus,*  
644 *Tamias\_minimus,*  
645 *Spermophilus\_dauricus,*  
646 *Ictidomys\_tridecemlineatus,*  
647 *Cynomys\_ludovicianus,*  
648 *Marmota\_monax,*  
649 *Marmota\_caligata,*  
650 *Marmota\_marmota,*  
651 *Marmota\_sibirica,*  
652 *Sciurus\_anomalus,*

653 *Sciurus\_niger*,  
654 *Sciurus\_carolinensis*,  
655 *Sciurus\_griseus*,  
656 *Microsciurus\_mimulus*,  
657 *Microsciurus\_alfari*,  
658 *Microsciurus\_flaviventer*,  
659 *Sciurus\_vulgaris*,  
660 *Tamiasciurus\_hudsonicus*,  
661 *Glaucomys\_volans*,  
662 *Petaurista\_leucogenys*,  
663 *Petaurista\_philippensis*,  
664 *Petaurista\_alborufus*,  
665 *Petaurista\_grandis*,  
666 *Laonastes\_aenigmamus*,  
667 *Atherurus\_macrourus*,  
668 *Hystrix\_javanica*,  
669 *Hystrix\_cristata*,  
670 *Thryonomys\_swinderianus*,  
671 *Heterocephalus\_glaber*,  
672 *Heliophobius\_argenteocinereus*,  
673 *Cryptomys\_hottentotus*,  
674 *Georychus\_capensis*,  
675 *Bathyergus\_suillus*,  
676 *Cuniculus\_paca*,  
677 *Myoprocta\_acouchy*,  
678 *Dasyprocta\_leporina*,  
679 *Dasyprocta\_azarae*,  
680 *Hydrochoerus\_hydrochaeris*,  
681 *Dolichotis\_patagonum*,  
682 *Cavia\_porcellus*,  
683 *Cavia\_aperea*,  
684 *Erethizon\_dorsatum*,  
685 *Coendou\_prehensilis*,  
686 *Lagostomus\_maximus*,  
687 *Chinchilla\_lanigera*,  
688 *Chinchilla\_chinchilla*,  
689 *Phyllomys\_sulinus*,  
690 *Myocastor\_coypus*,  
691 *Capromys\_pilorides*,  
692 *Ctenomys\_boliviensis*,  
693 *Ctenomys\_talarum*,  
694 *Octodon\_degus*,  
695 *Spalacopus\_cyanus*,  
696 *Dipus\_sagitta*,  
697 *Jaculus\_orientalis*,  
698 *Jaculus\_jaculus*,  
699 *Stylodipus\_telum*,  
700 *Allactaga\_euphratica*,  
701 *Allactaga\_major*,  
702 *Zapus\_princeps*,  
703 *Sicista\_concolor*,  
704 *Spalax\_leucodon*,  
705 *Rhizomys\_pruinosus*,  
706 *Dicrostonyx\_groenlandicus*,  
707 *Ondatra\_zibethicus*,  
708 *Lemmus\_sibiricus*,  
709 *Synaptomys\_cooperi*,  
710 *Ellobius\_talpinus*,



711 *Microtus\_arvalis*,  
712 *Microtus\_pennsylvanicus*,  
713 *Microtus\_ochrogaster*,  
714 *Microtus\_chrotorrhinus*,  
715 *Microtus\_oeconomus*,  
716 *Myodes\_gapperi*,  
717 *Mesocricetus\_auratus*,  
718 *Tscherskia\_triton*,  
719 *Cricetus\_cricetus*,  
720 *Cricetulus\_migratorius*,  
721 *Cricetulus\_longicaudatus*,  
722 *Cricetulus\_barabensis*,  
723 *Phodopus\_sungorus*,  
724 *Neotoma\_fuscipes*,  
725 *Neotoma\_lepida*,  
726 *Neotoma\_floridana*,  
727 *Neotoma\_albigula*,  
728 *Neotoma\_mexicana*,  
729 *Neotoma\_cinerea*,  
730 *Hodomys\_alleni*,  
731 *Nelsonia\_neotomodon*,  
732 *Xenomys\_nelsoni*,  
733 *Ochrotomys\_nuttalli*,  
734 *Reithrodontomys\_creper*,  
735 *Reithrodontomys\_mexicanus*,  
736 *Reithrodontomys\_fulvescens*,  
737 *Reithrodontomys\_sumichrasti*,  
738 *Reithrodontomys\_megalotis*,  
739 *Reithrodontomys\_humulis*,  
740 *Reithrodontomys\_montanus*,  
741 *Isthmomyss\_pirrensis*,  
742 *Isthmomyss\_flavidus*,  
743 *Onychomys\_torridus*,  
744 *Onychomys\_leucogaster*,  
745 *Peromyscus\_maniculatus*,  
746 *Peromyscus\_leucopus*,  
747 *Megadontomys\_thomasi*,  
748 *Peromyscus\_yucatanicus*,  
749 *Peromyscus\_guatemalensis*,  
750 *Peromyscus\_mexicanus*,  
751 *Peromyscus\_megalops*,  
752 *Peromyscus\_melanophrys*,  
753 *Habromys\_lepturus*,  
754 *Habromys\_lophurus*,  
755 *Peromyscus\_crinitus*,  
756 *Peromyscus\_ochraventer*,  
757 *Peromyscus\_truei*,  
758 *Peromyscus\_difficilis*,  
759 *Peromyscus\_attwateri*,  
760 *Peromyscus\_furvus*,  
761 *Peromyscus\_spicilegus*,  
762 *Peromyscus\_boyllii*,  
763 *Podomys\_floridanus*,  
764 *Neotomodon\_alstoni*,  
765 *Peromyscus\_californicus*,  
766 *Peromyscus\_eremicus*,  
767 *Osgoodomys\_banderanus*,  
768 *Scotinomys\_xerampelinus*,

769 Scotinomys\_teguina,  
770 Baiomys\_taylori,  
771 Baiomys\_musculus,  
772 Tylomys\_panamensis,  
773 Tylomys\_mirae,  
774 Tylomys\_watsoni,  
775 Tylomys\_fulviventer,  
776 Tylomys\_nudicaudus,  
777 Ototylomys\_phyllotis,  
778 Nyctomys\_sumichrasti,  
779 Chibchanomys\_trichotis,  
780 Reithrodon\_auritus,  
781 Rheomys\_underwoodi,  
782 Rheomys\_thomasi,  
783 Rheomys\_mexicanus,  
784 Rheomys\_raptor,  
785 Ichthyomys\_pittieri,  
786 Ichthyomys\_hydrobates,  
787 Ichthyomys\_tweedii,  
788 Neusticomys\_venezuelae,  
789 Neusticomys\_ferreirai,  
790 Neusticomys\_monticolus,  
791 Anotomys\_leander,  
792 Chinchillula\_sahamae,  
793 Sigmodon\_leucotis,  
794 Sigmodon\_fulviventer,  
795 Sigmodon\_alleni,  
796 Sigmodon\_ochrognathus,  
797 Sigmodon\_hispidus,  
798 Rhipidomys\_macconnelli,  
799 Rhipidomys\_nitela,  
800 Rhipidomys\_mastacalis,  
801 Rhipidomys\_fulviventer,  
802 Rhipidomys\_venustus,  
803 Rhipidomys\_couesi,  
804 Rhipidomys\_venezuelae,  
805 Rhipidomys\_latimanus,  
806 Rhipidomys\_austrinus,  
807 Aepeomys\_lugens,  
808 Thomasomys\_gracilis,  
809 Thomasomys\_cinereus,  
810 Thomasomys\_rhoadsi,  
811 Thomasomys\_baeops,  
812 Thomasomys\_aureus,  
813 Thomasomys\_pyrrhonotus,  
814 Thomasomys\_daphne,  
815 Thomasomys\_oreas,  
816 Thomasomys\_hylophilus,  
817 Thomasomys\_paramorum,  
818 Chilomys\_instans,  
819 Akodon\_bogotensis,  
820 Blarinomys\_breviceps,  
821 Scapteromys\_tumidus,  
822 Scapteromys\_meridionalis,  
823 Scapteromys\_aquaticus,  
824 Kunsia\_tomentosus,  
825 Thalpomys\_lasiotis,  
826 Necromys\_amoenus,

827 *Necromys\_urichi*,  
828 *Necromys\_lasiurus*,  
829 *Necromys\_temchuki*,  
830 *Necromys\_obscurus*,  
831 *Necromys\_lactens*,  
832 *Akodon\_mimus*,  
833 *Akodon\_azarae*,  
834 *Akodon\_boliviensis*,  
835 *Akodon\_subfuscus*,  
836 *Akodon\_lutescens*,  
837 *Akodon\_cursor*,  
838 *Akodon\_simulator*,  
839 *Akodon\_albiventer*,  
840 *Akodon\_mollis*,  
841 *Akodon\_torques*,  
842 *Akodon\_aerosus*,  
843 *Deltamys\_kempi*,  
844 *Thaptomys\_nigrita*,  
845 *Oxymycterus\_delator*,  
846 *Oxymycterus\_paramensis*,  
847 *Oxymycterus\_rufus*,  
848 *Oxymycterus\_inca*,  
849 *Zygodontomys\_brevicauda*,  
850 *Oecomys\_concolor*,  
851 *Oecomys\_roberti*,  
852 *Oecomys\_bicolor*,  
853 *Oecomys\_superans*,  
854 *Oecomys\_trinitatis*,  
855 *Oecomys\_mamora*,  
856 *Oecomys\_paricola*,  
857 *Transandinomys\_talamancae*,  
858 *Transandinomys\_bolivaris*,  
859 *Euryoryzomys\_nitidus*,  
860 *Euryoryzomys\_russatus*,  
861 *Euryoryzomys\_legatus*,  
862 *Nephelomys\_albigularis*,  
863 *Nephelomys\_keaysi*,  
864 *Hylaeamys\_megacephalus*,  
865 *Handleyomys\_alfaroi*,  
866 *Handleyomys\_melanotis*,  
867 *Handleyomys\_chapmani*,  
868 *Neacomys\_guianae*,  
869 *Neacomys\_spinosus*,  
870 *Neacomys\_tenuipes*,  
871 *Microryzomys\_minutus*,  
872 *Microryzomys\_altissimus*,  
873 *Oligoryzomys\_microtis*,  
874 *Oligoryzomys\_nigripes*,  
875 *Oligoryzomys\_destructor*,  
876 *Oligoryzomys\_fulvescens*,  
877 *Oligoryzomys\_eliurus*,  
878 *Oligoryzomys\_delticola*,  
879 *Oligoryzomys\_chacoensis*,  
880 *Oligoryzomys\_andinus*,  
881 *Oligoryzomys\_magellanicus*,  
882 *Oligoryzomys\_longicaudatus*,  
883 *Oligoryzomys\_flavescens*,  
884 *Eremoryzomys\_poli*

885 *Cerradomys\_subflavus*,  
886 *Sooretamys\_angouya*,  
887 *Holochilus\_brasiliensis*,  
888 *Holochilus\_chacarius*,  
889 *Pseudoryzomys\_simplex*,  
890 *Lundomys\_molitor*,  
891 *Nectomys\_squamipes*,  
892 *Oryzomys\_couesi*,  
893 *Oryzomys\_palustris*,  
894 *Sigmodontomys\_alfari*,  
895 *Melanomys\_caliginosus*,  
896 *Nesoryzomys\_indefessus*,  
897 *Irenomys\_tarsalis*,  
898 *Euneomys\_petersoni*,  
899 *Euneomys\_chinchilloides*,  
900 *Andinomys\_edax*,  
901 *Punomys\_kofordi*,  
902 *Delomys\_sublineatus*,  
903 *Delomys\_dorsalis*,  
904 *Calomys\_lepidus*,  
905 *Calomys\_sorellus*,  
906 *Calomys\_musculus*,  
907 *Calomys\_laucha*,  
908 *Calomys\_tener*,  
909 *Calomys\_boliviae*,  
910 *Calomys\_callosus*,  
911 *Calomys\_venustus*,  
912 *Calomys\_hummelincki*,  
913 *Eligmodontia\_morgani*,  
914 *Eligmodontia\_puerulus*,  
915 *Eligmodontia\_moreni*,  
916 *Eligmodontia\_hirtipes*,  
917 *Eligmodontia\_bolsonensis*,  
918 *Graomys\_griseoflavus*,  
919 *Graomys\_domorum*,  
920 *Andalgalomys\_pearsoni*,  
921 *Andalgalomys\_olrogi*,  
922 *Salinomys\_delicatus*,  
923 *Phyllotis\_wolffsohni*,  
924 *Tapecomys\_primus*,  
925 *Auliscomys\_sublimis*,  
926 *Auliscomys\_pictus*,  
927 *Auliscomys\_boliviensis*,  
928 *Galenomys\_garleppi*,  
929 *Loxodontomys\_micropus*,  
930 *Phyllotis\_osilae*,  
931 *Phyllotis\_alisosiensis*,  
932 *Phyllotis\_anitae*,  
933 *Phyllotis\_caprinus*,  
934 *Phyllotis\_xanthopygus*,  
935 *Phyllotis\_darwini*,  
936 *Phyllotis\_amicus*,  
937 *Paralomys\_gerbillus*,  
938 *Phyllotis\_haggardi*,  
939 *Phyllotis\_andium*,  
940 *Calassomys\_apicalis*,  
941 *Akodon\_neocenus*,  
942 *Wiedomys\_pyrrhorhinos*,

943 *Juliomys pictipes*,  
944 *Abrothrix olivaceus*,  
945 *Abrothrix andinus*,  
946 *Abrothrix jelskii*,  
947 *Abrothrix illuteus*,  
948 *Abrothrix longipilis*,  
949 *Abrothrix sanborni*,  
950 *Notiomys edwardsii*,  
951 *Geoxus valdivianus*,  
952 *Chelemys macronyx*,  
953 *Mystromys albicaudatus*,  
954 *Saccostomus campestris*,  
955 *Beamys hindei*,  
956 *Cricetomys gambianus*,  
957 *Brachytarsomys albicauda*,  
958 *Gymnuromys roberti*,  
959 *Eliurus myoxinus*,  
960 *Brachyuromys ramirohitra*,  
961 *Nesomys rufus*,  
962 *Nesomys audeberti*,  
963 *Macrotarsomys bastardi*,  
964 *Calomyscus baluchi*,  
965 *Lophiomys imhausi*,  
966 *Pachyuromys duprasi*,  
967 *Psammomys obesus*,  
968 *Meriones shawi*,  
969 *Meriones unguiculatus*,  
970 *Sekeetamys calurus*,  
971 *Ammodillus imbellis*,  
972 *Microdillus peeli*,  
973 *Gerbillus cheesmani*,  
974 *Taterillus arenarius*,  
975 *Gerbilliscus nigricaudus*,  
976 *Gerbillurus setzeri*,  
977 *Desmodillus auricularis*,  
978 *Tatera indica*,  
979 *Notomys amplus*,  
980 *Conilurus albipes*,  
981 *Hydromys chrysogaster*,  
982 *Mastomys coucha*,  
983 *Mus musculus*,  
984 *Rhabdomys pumilio*,  
985 *Micromys minutus*,  
986 *Maxomys inflatus*,  
987 *Rattus rattus*,  
988 *Rattus fuscipes*,  
989 *Rattus norvegicus*,  
990 *Pedetes surdaster*,  
991 *Pedetes capensis*,  
992 *Anomalurus pelii*,  
993 *Anomalurus derbianus*,  
994 *Anomalurus beecrofti*,  
995 *Anomalurus pusillus*,  
996 *Microdipodops pallidus*,  
997 *Dipodomys spectabilis*,  
998 *Dipodomys ordii*,  
999 *Dipodomys heermanni*,  
1000 *Dipodomys merriami*,

1001 Thomomys\_bulbivorus,  
1002 Thomomys\_umbrinus,  
1003 Thomomys\_bottae,  
1004 Geomys\_pinetis,  
1005 Geomys\_bursarius,  
1006 Geomys\_arenarius,  
1007 Cratogeomys\_castanops,  
1008 Liomys\_salvini,  
1009 Heteromys\_anomalus,  
1010 Perognathus\_fasciatus,  
1011 Castor\_fiber,  
1012 Castor\_canadensis,  
1013 Hydrodamalis\_gigas,  
1014 Trichechus\_manatus,  
1015 Trichechus\_senegalensis,  
1016 Trichechus\_inunguis,  
1017 Dugong\_dugon,  
1018 Loxodonta\_africana,  
1019 Elephas\_maximus,  
1020 Procavia\_capensis,  
1021 Heterohyrax\_brucei,  
1022 Dendrohyrax\_validus,  
1023 Dendrohyrax\_dorsalis,  
1024 Dendrohyrax\_arboreus,  
1025 Orycteropus\_afer,  
1026 Rhynchocyon\_cirnei,  
1027 Rhynchocyon\_chrysopygus,  
1028 Rhynchocyon\_petersi,  
1029 Elephantulus\_myurus,  
1030 Elephantulus\_edwardii,  
1031 Macroscelides\_proboscideus,  
1032 Petrodromus\_tetradactylus,  
1033 Elephantulus\_rufescens,  
1034 Elephantulus\_brachyrhynchus,  
1035 Elephantulus\_intufi,  
1036 Elephantulus\_rupestris,  
1037 Potamogale\_velox,  
1038 Limnogale\_mergulus,  
1039 Microgale\_talazaci,  
1040 Microgale\_longicaudata,  
1041 Microgale\_cowani,  
1042 Oryzorictes\_tetradactylus,  
1043 Tenrec\_ecaudatus,  
1044 Hemicentetes\_semispinosus,  
1045 Setifer\_setosus,  
1046 Echinops\_telfairi,  
1047 Eremitalpa\_granti,  
1048 Amblysomus\_hottentotus,  
1049 Calcochloris\_obtusirostris,  
1050 Chrysospalax\_trevelyani,  
1051 Chrysochloris\_asiatica,  
1052 Dasypus\_hybridus,  
1053 Dasypus\_novemcinctus,  
1054 Dasypus\_kappleri,  
1055 Dasypus\_septemcinctus,  
1056 Zaedyus\_pichiy,  
1057 Euphractus\_sexcinctus,  
1058 Chaetophractus\_vellerosus,

1059 *Chaetophractus villosus*,  
1060 *Chlamyphorus truncatus*,  
1061 *Tolypeutes matacus*,  
1062 *Priodontes maximus*,  
1063 *Cabassous unicinctus*,  
1064 *Tamandua tetradactyla*,  
1065 *Tamandua mexicana*,  
1066 *Myrmecophaga tridactyla*,  
1067 *Cyclopes didactylus*,  
1068 *Choloepus hoffmanni*,  
1069 *Choloepus didactylus*,  
1070 *Bradypus tridactylus*,  
1071 *Bradypus variegatus*,  
1072 *Rhyncholestes raphanurus*,  
1073 *Caenolestes fuliginosus*,  
1074 *Glironia venusta*,  
1075 *Monodelphis domestica*,  
1076 *Gracilinanus microtarsus*,  
1077 *Metachirus nudicaudatus*,  
1078 *Didelphis virginiana*,  
1079 *Didelphis marsupialis*,  
1080 *Didelphis albiventris*,  
1081 *Chironectes minimus*,  
1082 *Caluromys philander*,  
1083 *Dromiciops gliroides*,  
1084 *Notoryctes typhlops*,  
1085 *Notoryctes caurinus*,  
1086 *Macrotis lagotis*,  
1087 *Isoodon macrourus*,  
1088 *Isoodon obesulus*,  
1089 *Perameles gunnii*,  
1090 *Perameles nasuta*,  
1091 *Sarcophilus harrisii*,  
1092 *Dasyurus maculatus*,  
1093 *Dasyurus viverrinus*,  
1094 *Dasyuroides byrnei*,  
1095 *Dasycercus cristicauda*,  
1096 *Antechinus flavipes*,  
1097 *Thylacinus cynocephalus*,  
1098 *Myrmecobius fasciatus*,  
1099 *Phascolarctos cinereus*,  
1100 *Vombatus ursinus*,  
1101 *Lasiorhinus latifrons*,  
1102 *Cercartetus concinnus*,  
1103 *Trichosurus vulpecula*,  
1104 *Spilocuscus maculatus*,  
1105 *Phalanger sericeus*,  
1106 *Phalanger orientalis*,  
1107 *Hypsiprymnodon moschatus*,  
1108 *Thylogale billardierii*,  
1109 *Petrogale lateralis*,  
1110 *Petrogale penicillata*,  
1111 *Dendrolagus goodfellowi*,  
1112 *Dendrolagus matschiei*,  
1113 *Dendrolagus bennettianus*,  
1114 *Dendrolagus lumholtzi*,  
1115 *Macropus fuliginosus*,  
1116 *Macropus giganteus*,







4):1.649986679):13.36364105):7.493624294):0.1556174365,((((((((((713:6.99  
7715623,714:6.997715623):0.1246175215,712:7.122333145):0.5868634845,711:7  
.709196629):1.440607806,715:9.149804435):1.893595606,710:11.04340004):0.8  
469103145,716:11.89031035):0.8648128718,(708:8.148839258,709:8.148839258)  
:4.606283969):0.03157192374,707:12.78669515):0.7149048365,706:13.50159999  
) :19.84039991,((((721:4.209291878,722:4.209291878):4.188150096,720:8.397  
441974):1.427067931,(718:9.144890154,719:9.144890154):0.679619751):9.5998  
65993,717:19.4243759):2.096720378,723:21.52109628):11.82090362):1.0440860  
96):9.804778764,((((961:5.130073357,962:5.130073357):8.1656864,960:13.29  
575976):9.107556405,963:22.40331616):3.718762367,(958:16.69150438,959:16  
.69150438):5.512534949,957:22.20403933):3.9180392):8.027943868,((((955:16.  
48248209,956:16.48248209):9.737653645,954:26.22013574):6.741478987,953:32  
.96161472):1.188407674):10.04084236):2.473701972,((((((((970:0.08905218  
162,971:0.08905218162):1.187586306,972:1.276638488):9.592963941,973:10.86  
960243):3.739649071,974:14.6092515):0.8098591226,(968:2.818468591,969:2.  
818468591):7.605619215,967:10.42408781):4.995022816):4.182077305,966:19.6  
0118793):2.765204599,((((975:11.74367884,976:11.74367884):5.670993638,977:  
17.41467248):1.422385242,978:18.83705773):3.5293348):20.26027632,965:42.6  
2666884):2.448558108,((((979:10.99383779,980:10.99383779):0.9810682416,98  
1:11.97490603):14.12407418,(982:22.03440973,983:22.03440973):2.588708003  
,984:24.62311773):1.475862474):0.5369734673,((((988:6.025120696,989:6.025  
120696):0.6305542469,987:6.655674943):10.3619164,986:17.01759134):7.68852  
1198,985:24.70611254):1.929841134):18.43927328):5.127054297e-  
05,964:45.07527822):1.589288508):14.28478616,(704:35.19079367,705:35.1907  
9367):25.75855922):3.980138607,((((697:3.618652316,698:3.618652316):3.1  
74274506,699:6.792926822):0.9976357257,696:7.790562547):6.351333324,(700:  
9.490868891,701:9.490868891):4.65102698):13.27154644,702:27.41344231):9.9  
5234742,703:37.36578973):27.56370177):1.780117106,((((992:2.599023325,993:  
2.599023325):1.826910313,(994:3.538772526,995:3.538772526):0.887161112):3  
5.72229883,(990:3.996562947,991:3.996562947):36.15166952):26.56137613):0.  
4831600095,((((1005:2.46476153,1006:2.46476153):5.383010428,1004:7.847  
771958):0.6803819231,1007:8.528153881):2.71293184,(1002:2.370004994,1003  
:2.370004994):5.221383917,1001:7.591388911):3.64969681):11.99070056,(100  
8:12.72705769,1009:12.72705769):9.357310657,1010:22.08436834):1.147417937  
) :1.608882816,((((998:5.487976882,999:5.487976882):1.377968391,1000:6.865  
945273):2.192845598,997:9.058790871):7.191591324,996:16.25038219):8.59028  
6901):23.68925458,(1011:5.585109854,1012:5.585109854):42.94481383):18.662  
84493):2.120543194,((((((((692:3.561002508,693:3.561002508):11.52930186  
,(694:4.367015749,695:4.367015749):10.72328862):2.670739299,(689:12.6822  
0086,690:12.68220086):2.718075678,691:15.40027653):2.360767135):10.927559  
25,((687:1.951891596,688:1.951891596):11.10183836,686:13.05372996):15.634  
87296):0.888445952,(684:6.361670764,685:6.361670764):23.2153781):0.784721  
0641,((((680:13.23389126,681:13.23389126):1.772732702,(682:1.2373348,683:  
1.2373348):13.76928916):6.196352618,(678:2.926558515,679:2.926558515):5.  
123307367,677:8.049865882):13.1531107):0.6620909569,676:21.86506754):8.49  
6702396):5.889833791,((((674:7.129630773,675:7.129630773):3.589324356,67  
3:10.71895513):3.409683635,672:14.12863876):12.38588154,671:26.5145203):5  
.481691633,670:31.99621194):4.255391786):2.569542123,((668:3.199331723,66  
9:3.199331723):3.007733339,667:6.207065062):32.61408078):16.93924452,666:  
55.76039037):1.505207604,((((((((656:4.76035366,657:4.76035366):0.33  
58334575,658:5.096187118):0.478678827,655:5.574865945):0.3155011653,654:5  
.89036711):2.002655257,653:7.893022366):0.7220574158,652:8.615079782):0.6  
993119337,659:9.314391716):2.830881417,660:12.14527313):7.122726985,((((6  
63:1.718967794,664:1.718967794):5.085686262,665:6.804654056):2.569902236,  
662:9.374556292):6.917800464,661:16.29235676):2.975643362):4.75778537,((((  
(649:3.02631311,650:3.02631311):0.4441013383,651:3.470414448):0.7203455  
824,648:4.19076003):3.631316631,(646:5.36631681,647:5.36631681):1.203813  
155,645:6.570129965):1.251946696):8.951200684,(643:6.174263156,644:6.1742

63156):10.59901419):6.53929561,642:23.31257295):0.7132125332):3.211909727  
,641:27.23769521):2.229092984,640:29.4667882):17.00825475,639:46.47504294  
) :10.79055503):12.04771383):1.223635293,((((((631:2.416684946,632:2.4166  
84946):1.509003822,633:3.925688768):1.24498625,(629:0.9596425718,630:0.95  
96425718):4.211032446):1.92387726,634:7.094552278):6.208026518,((627:11.3  
3742933,628:11.33742933):0.6579228637,626:11.99535219):1.307226603):8.471  
953348,(635:0.1453406627,636:0.1453406627):21.62919148):27.09860666,(637:  
6.160571787,638:6.160571787):42.71256702):21.66380829):7.401176797,(((((  
((((((((597:0.8956057783,598:0.8956057783):0.3084623234,599:1.204068102  
) :0.7118863166,596:1.915954418):0.3059562244,595:2.221910643):0.381379748  
2,594:2.603290391):1.168741588,(((591:1.338754273,592:1.338754273):0.198  
6986342,590:1.537452907):0.1817857894,589:1.719238696):1.617190986,593:3.  
336429683):0.4356022961):1.23953795,600:5.011569929):2.368511927,(((((  
4:0.969004275,605:0.969004275):0.47726651,603:1.446270785):1.004409562,60  
2:2.450680347):1.350308223,606:3.80098857):0.9144348077,601:4.715423377):  
1.8544448,((607:3.624305935,608:3.624305935):1.175688542,(609:3.869423503  
,610:3.869423503):0.9305709738):1.769873701):0.8102136785):0.8465569805,(  
((((614:1.103823264,615:1.103823264):0.4665126334,616:1.570335897):1.868  
716798,617:3.439052695):1.500577781,613:4.939630476):0.461391214,(611:4.5  
11068584,612:4.511068584):0.8899531067):2.165977142,618:7.566998833):0.65  
96400039):3.943806851,((((578:1.808113142,579:1.808113142):0.8208035497  
,580:2.628916691):3.242198918,581:5.871115609):1.684803091,(582:1.8667287  
71,583:1.866728771):5.68918993):0.1693592406,((584:2.871824009,585:2.8718  
24009):3.488826935,586:6.360650944):1.364626997):1.370447442,(587:1.35900  
9654,588:1.359009654):7.73671573):3.074720304):7.28539306,(((((((564:0.6  
065606634,565:0.6065606634):0.5861359086,563:1.192696572):0.04864384233,5  
66:1.241340414):0.4894188673,562:1.730759282):0.9140660954,561:2.64482537  
7):1.365279536,560:4.010104913):0.1865754759,((568:1.07989432,569:1.0798  
9432):0.3302778216,567:1.410172142):2.399410584,570:3.809582726):0.387097  
663):8.482821895,(((573:1.961807787,574:1.961807787):2.247142378,575:4.2  
08950165):1.612984779,(576:1.797214971,577:1.797214971):4.024719973):4.14  
4758027,(571:2.708883283,572:2.708883283):7.257809688):2.712809313):6.776  
336464):11.80137614,((((540:4.102344042,541:4.102344042):1.320287833,5  
39:5.422631875):4.877562412,538:10.30019429):0.4801583184,(536:7.88440440  
4,537:7.884404404):2.895948201):3.541969823,(((543:1.066304333,544:1.066  
304333):0.2313748148,545:1.297679147):12.10961345,542:13.4072926):0.76034  
21067,(546:3.46538376,547:3.46538376):10.70225094):0.1546877265):2.699730  
701,((((558:0.7076357644,559:0.7076357644):1.182461144,557:1.890096909):  
0.9457157717,(555:1.30571922,556:1.30571922):1.53009346):6.199464122,((55  
3:0.8307450723,554:0.8307450723):2.538614483,552:3.369359555):5.665917248  
) :2.662528622,((550:1.201056851,551:1.201056851):1.251230827,549:2.45228  
7678):1.958967423,548:4.411255101):7.286550324):5.324247705):0.9158236293  
,((((531:0.1810552962,532:0.1810552962):4.190106231,533:4.371161528):4.33  
3659972,534:8.7048215):5.278568971,535:13.98339047):3.954486289):13.31933  
813):35.54553651,530:66.8027514):4.129952017,((((((((524:0.0695918702,  
525:0.0695918702):0.5430825108,523:0.612674381):0.654698023,522:1.2673724  
04):0.7283740941,(520:1.733771899,521:1.733771899):0.2619745991):1.037135  
252,519:3.03288175):6.466832526,(517:5.703183058,518:5.703183058):3.79653  
1218):3.668124049,516:13.16783832):7.566167816,((528:5.274600251,529:5.2  
74600251):9.422663946,527:14.6972642):3.871977325,526:18.56924152):2.1647  
64619):2.455603672,(((513:1.859501843,514:1.859501843):3.585345775,512:5  
.444847618):3.899221365,515:9.344068983):1.629411762,511:10.97348074):12.  
21612907):17.38692415,510:40.57653397):8.9939339,((((504:2.310165748,505  
:2.310165748):4.292832632,506:6.60299838):4.097058576,507:10.70005696):9.  
42444647,(508:13.10780959,509:13.10780959):7.016693831):1.239913488,(502:  
14.89988624,503:14.89988624):6.46453068):28.20605095):21.36223555):1.1636  
28807,(500:9.513215296,501:9.513215296):62.58311692):2.205612582,((((620  
:4.47654706,621:4.47654706):7.471256175,(622:10.26964101,623:10.26964101)

:1.678162224):3.08655143,624:15.03435466):52.75287637,625:67.78723103):2.765928247,619:70.55315928):3.748785521):3.636179094):9.900059783,(((((((((((((389:0.343825471,390:0.343825471):0.9730904141,391:1.316915885):0.8998766056,388:2.216792491):2.564309889,(392:1.934802432,393:1.934802432):2.178450763,394:4.113253195):0.6678491852):0.3775475586,((397:3.833289923,398:3.833289923):0.4508800278,396:4.28416995):0.4447754168,395:4.728945367):0.4297045711):0.6835079939,(386:4.768879677,387:4.768879677):1.073278255):3.30576141,((((401:1.862258443,402:1.862258443):0.3030186091,403:2.165277052):0.8615896729,404:3.026866725):2.351756372,(399:0.6145538831,400:0.6145538831):4.764069214):3.481785345,(((409:0.7120963052,410:0.7120963052):0.6108373646,408:1.32293367):0.7125311761,407:2.035464846):4.495217587,(405:5.191906226,406:5.191906226):1.338776208):2.329726009):0.2875109):1.006925202,((((383:1.10692775,384:1.10692775):1.553705408,382:2.660633158):0.6112969272,385:3.271930085):1.674961217,(380:2.751710751,381:2.751710751):1.06564736,379:3.817358111):1.129533191):1.168039358,378:6.114930659):2.476144275,377:8.591074935):0.2684582382,376:8.859533173):1.295311372):0.2459982534,((((370:1.391941833,371:1.391941833):0.1361551015,372:1.528096935):1.619407243,373:3.147504177):0.3752360195,369:3.522740197):0.6318954999,368:4.154635697):2.885146622,(374:5.568577611,375:5.568577611):1.471204707):0.2939627162,367:7.333745035):1.018043587,(((363:2.224456173,364:2.224456173):0.6619974069,362:2.88645358):4.331174624,(365:1.256128068,366:1.256128068):5.961500136):1.134160418):0.4178198714,361:8.769608493):1.631234304):0.134693884,((((356:2.480313185,357:2.480313185):0.9320230733,(358:2.244034532,359:2.244034532):1.168301726):0.2244798958,360:3.636816154):4.320529395,(354:1.995682149,355:1.995682149):1.468703418,353:3.464385567):4.492959982):0.4379220344,352:8.395267583):2.140269099):1.130291526,(350:9.96929251,351:9.96929251):1.696535698):0.7438869419,((((344:0.3740990061,345:0.3740990061):1.647044691,346:2.021143698):0.6841425178,(347:0.995373848,348:0.995373848):0.2588640995,349:1.254237948):1.451048268):0.6675218273,343:3.372808043):4.449295346,(((341:1.101563396,342:1.101563396):0.7014552817,340:1.803018678):3.004661982,339:4.80768066):3.014422729):2.169996776,((((335:1.27898065,336:1.27898065):1.191162177,334:2.470142827):0.7342149618,337:3.204357789):0.6432052169,338:3.847563006):1.149351828,333:4.996914834):0.9805147049,332:5.977429539):4.014670626):0.4668102164,(330:5.000787138,331:5.000787138):5.458123244):1.950804768):0.5384184084,(328:2.447895485,329:2.447895485):10.50023807):0.8810748843,((((322:2.851784905,323:2.851784905):0.6428085231,324:3.494593428):0.9910536873,(320:1.209147785,321:1.209147785):3.27649933):0.5901272785,319:5.075774394):2.023854609,(325:2.412492263,326:2.412492263):4.041199464,327:6.453691727):0.6459372757):0.3856976688,((((315:1.113581437,316:1.113581437):1.913583596,314:3.027165033):1.186350802,313:4.213515835):0.166720273,(317:2.23392383,318:2.23392383):2.146312279):1.387977641,312:5.768213749):1.717112922):6.343881771):1.877440651,(309:6.557509454,310:6.557509454):6.600756917,311:13.15826637):2.548382722):15.29823069,((306:1.604939437,307:1.604939437):3.465908503,308:5.07084794):14.74887558,(304:2.545930761,305:2.545930761):17.27379276):11.18515626):9.535366401,((((((((329:0.2752692627,260:0.2752692627):0.3085913757,(261:0.5296990403,262:0.5296990403):0.05416159813):0.06252696039,258:0.6463875988):0.06345446603,257:0.7098420649):0.2431172206,256:0.9529592854):0.1936751244,255:1.14663441):0.26979864,(253:1.10883491,254:1.10883491):0.3075981397):0.4228105777,252:1.839243627):1.260889586,(250:0.5804197745,251:0.5804197745):1.675785225,249:2.256205):0.843928214):0.2250151572,(((267:0.4732294317,268:0.4732294317):0.6933579564,(269:0.6054011827,270:0.6054011827):0.5611862054):0.527309839,(265:0.8827556068,266:0.8827556068):0.8111416203):0.2110120687,(263:1.044549164,264:1.044549164):0.8603601318):1.420239075):0.0466106286,((((246:0.5423653198,247:0.5423653198):0.4998617221,248:1.042227042):0.1014236399,245:1.143650682):0.1932927445,244:1.336943426):0.7796299534,243:2.11657338):1.054825857,242:3.171

399237):0.2003597627):0.373697305,241:3.745456305):0.2143091607,240:3.959  
765465):0.4502596708,239:4.410025136):3.069434135,(((235:0.9960859121,23  
6:0.9960859121):0.7639727384,(237:0.9694863849,238:0.9694863849):0.790572  
2656):0.9686896205,234:2.728748271):2.485485694,(231:0.06312635742,232:0  
.06312635742):2.291921817,233:2.355048174):2.859185791):2.265225307):1.71  
757535,((228:1.448290033,229:1.448290033):4.91139975,227:6.359689782):1.  
967747275,230:8.327437058):0.8695975638):1.555760376,(((((((279:1.94061  
5665,280:1.940615665):0.4118703361,278:2.352486001):1.102988559,281:3.455  
474561):0.3722470061,((283:2.254963695,284:2.254963695):1.1706237,282:3.4  
25587395):0.4021341717):0.3778918148,(276:2.034421747,277:2.034421747):2.  
171191634):0.9704761505,(274:0.4126057709,275:0.4126057709):4.763483761):  
0.1115062235,273:5.287595755):0.6075015758,285:5.895097331):0.2282876387,  
(271:0.444778819,272:0.444778819):5.678606151):4.629410028):0.9057316166,  
226:11.65852661):0.3744766241,((223:3.442065007,224:3.442065007):6.635709  
293,225:10.0777743):1.955228939):0.2526039909,(((((((291:0.7487242651  
,292:0.7487242651):0.5923035821,290:1.341027847):0.4196063046,293:1.76063  
4152):0.08469296414,289:1.845327116):0.3577326236,288:2.203059739):0.1780  
337482,294:2.381093488):0.2740668179,((296:0.3054612818,297:0.3054612818)  
:2.03275918,295:2.338220461):0.3169398441):0.1259222597,298:2.781082565):  
0.1729866324,287:2.954069198):0.1822490093,286:3.136318207):3.437053327,(  
((301:0.1721104094,302:0.1721104094):3.73087884,303:3.90298925):0.648978  
7831,300:4.551968033):0.7838944782,299:5.335862511):1.237509023):5.712235  
695):7.931287439,222:20.21689467):11.55845331,(220:4.832074845,221:4.8320  
74845):26.94327313):8.764898207):5.457014537,((((217:2.267821081,218:2.2  
67821081):1.131978486,219:3.399799567):1.983090952,216:5.382890519):0.403  
1164188,((213:1.839338988,214:1.839338988):2.475727952,215:4.315066941):1  
.470939997):18.66244164,(211:3.871128717,212:3.871128717):20.57731986):21  
.54881214):4.748875494,((207:0.5669609207,208:0.5669609207):0.2415669409  
,206:0.8085278616):6.265394722,(209:1.612447616,210:1.612447616):5.461474  
967):43.67221363):3.302556507,((((201:3.893969257,202:3.893969257):5.290  
690921,203:9.184660178):1.240842316,(204:4.659661852,205:4.659661852):5.7  
65840642):14.44998501,((199:2.658010104,200:2.658010104):5.576660358,198:  
8.234670462):16.64081704):4.710595457,((((192:1.17722043,193:1.17722043)  
:0.6695909841,194:1.846811414):0.7884868361,195:2.63529825):0.2630634533,  
191:2.898361703):1.349129702,(196:0.7088259468,197:0.7088259468):3.538665  
458):25.33859156):24.46260976):1.061043409,(((((((124:1.81  
0224195,125:1.810224195):0.6981744799,126:2.508398675):0.3777015347,123:2  
.88610021):1.361681964,122:4.247782173):0.91081529,121:5.158597463):1.282  
798497,((118:0.9661037421,119:0.9661037421):1.236772649,120:2.202876391):  
4.238519569):0.5664141509,117:7.007810111):1.176727519,((115:1.502279383  
,116:1.502279383):0.2510335191,114:1.753312902):5.941603883,113:7.6949167  
85):0.4896208441):1.070778859,((((111:0.5633379267,112:0.5633379267):0.  
09224780225,110:0.6555857289):0.5377821851,109:1.193367914):1.446158705,1  
08:2.639526619):1.116408127,107:3.755934746):2.159819064,((105:2.57005738  
3,106:2.570057383):1.027141092,104:3.597198475):2.318555335):3.339562678)  
:0.7854006137,103:10.0407171):0.3377186814,((((98:0.9216580227,99:0.92  
16580227):1.109746374,100:2.031404397):0.729303191,97:2.760707588):2.2638  
99018,96:5.024606606):1.125097198,95:6.149703804):0.9526181412,101:7.1023  
21946):0.5846621107,102:7.686984056):2.691451727):0.3187955113,94:10.6972  
3129):0.131546095,((91:1.872841208,92:1.872841208):0.8634375218,93:2.7362  
78729):8.09249866):1.251543468,90:12.08032086):5.868018188,((84:0.65048  
26522,85:0.6504826522):5.61626203,86:6.266744683):4.942612833,((87:3.2611  
61045,88:3.261161045):5.059896971,89:8.321058017):2.888299499):2.51541908  
4,83:13.7247766):4.223562445):1.534103088,127:19.48244213):0.5146986004,(  
((79:5.77871815,80:5.77871815):3.800476017,(81:4.048447681,82:4.048447681  
):5.530746486):4.094701633,78:13.6738958):6.323244933):2.176349381,(((((  
(59:2.257309162,60:2.257309162):0.7586950901,58:3.016004252):0.0937232931  
8,57:3.109727545):0.8150408795,(55:0.9313242999,56:0.9313242999):2.993444

125):1.216261802,(53:5.009904904,54:5.009904904):0.1311253219):2.09642869  
6,((((64:0.7740060133,65:0.7740060133):0.5718513895,63:1.345857403):2.39  
6286471,62:3.742143873):0.2991418422,66:4.041285715):1.901998615,61:5.943  
28433):1.294174592):5.324456778,(((((((76:0.7667794035,77:0.7667794035):  
0.8611194847,75:1.627898888):0.5116613449,74:2.139560233):0.3678010104,73  
:2.507361244):0.2935062797,72:2.800867523):0.9336331591,(69:1.180051595,  
70:1.180051595):0.9158228594,71:2.095874454):1.638626228):1.478958175,68:  
5.213458857):2.498598087,67:7.712056945):4.849858756):9.611574414):0.7547  
978189,((((((131:1.463545769,132:1.463545769):0.1848685465,133:1.648414315  
) :0.8968468386,130:2.545261154):0.5220761885,(128:0.1583251258,129:0.1583  
251258):2.909012217):4.792754901,134:7.860092243):15.06819569):4.74872686  
9,(((((((46:0.9813024067,47:0.9813024067):0.2571640123,45:1.238466419)  
:0.8396329745,44:2.078099394):0.4809593359,43:2.559058729):0.644367425,(4  
8:2.491658219,49:2.491658219):0.7117679354):0.5417019699,42:3.745128124):  
0.09048589334,41:3.835614018):0.476262244,(51:0.4503375641,52:0.45033756  
41):1.258371836,50:1.7087094):2.603166862):2.28793183,(39:4.546353246,40:  
4.546353246):2.053454845):1.087140219,(((37:2.365160717,38:2.365160717):1  
.229918025,36:3.595078742):1.507510996,35:5.102589738):2.584358572):19.99  
006649):5.549315718,(((((((150:2.389909677,151:2.389909677):1.17280017  
4,149:3.562709852):0.3327080661,148:3.895417918):0.8410132485,(146:0.893  
3804393,147:0.8933804393):2.05086529,145:2.944245729):1.792185437):3.0310  
73674,(((152:3.524680068,153:3.524680068):2.536608528,(154:5.218421643,15  
5:5.218421643):0.8428669539):0.9182527745,156:6.979541371):0.7879634699):  
5.206455542,((((141:1.658557818,142:1.658557818):2.725625596,143:4.384183  
414):4.48394826,144:8.868131675):0.7367494561,140:9.604881131):3.36907925  
1):2.502632731,(136:1.892401769,137:1.892401769):1.418541819,(138:2.4748  
58823,139:2.474858823):0.8360847652):12.16564953):2.323846803,((((157:1.  
573462911,158:1.573462911):0.6611517489,159:2.23461466):0.1556295967,160:  
2.390244257):7.224782333,(((162:1.863823109,163:1.863823109):2.405237256,  
164:4.269060366):1.180401325,161:5.449461691):4.165564899):2.184740166,((  
(166:7.229395067,167:7.229395067):1.045444251,165:8.274839318):1.37093540  
8,(168:5.675010412,169:5.675010412):3.970764315):2.15399203):6.000673161)  
:1.09706119,(((((((185:0.02966930808,186:0.02966930808):1.544865187,187:  
1.574534495):1.408779237,188:2.983313732):0.4625153903,(183:0.447750377,1  
84:0.447750377):2.998078745):0.6791992981,(((179:1.684691589,180:1.684691  
589):0.4627419993,178:2.147433588):1.928987137,(181:3.341160399,182:3.341  
160399):0.7352603264):0.0486076953):0.3377798312,(189:3.578644946,190:3.5  
78644946):0.8841633054):0.457342589,((((176:1.628097904,177:1.628097904)  
:0.5838802906,175:2.211978195):0.4994727499,174:2.711450944):0.5926383619  
,173:3.304089306):0.5946726136,172:3.89876192):1.02138892):10.47749543,(1  
70:5.839481503,171:5.839481503):9.558164768):3.499854836):2.335808795,135  
:21.2333099):11.99302062):18.72195696,((32:12.97705679,33:12.97705679):8.  
935619372,34:21.91267616):30.03561133):3.161448644):6.465137503,(((((((  
(476:1.87770641,477:1.87770641):4.611517861,(478:1.520843643,479:1.5208  
43643):4.968380628):2.985110415,480:9.474334685):5.145636434,481:14.61997  
112):2.970785193,(((485:10.31764707,486:10.31764707):2.899090057,484:13.2  
1673713):1.23547694,(482:10.28392078,483:10.28392078):4.168293282):3.1385  
42245):0.5077677384,(((487:10.53623196,488:10.53623196):5.466877623,(489:  
14.8721294,490:14.8721294):1.130980183):0.9762685023,(491:12.80687427,49  
2:12.80687427):3.874949309,493:16.68182357):0.2975545103):1.119145966):3.  
736752969,(((472:3.90138433,473:3.90138433):0.8521870857,471:4.753571416  
) :1.121304888,(474:0.6652500135,475:0.6652500135):5.209626291):4.30210311  
2,470:10.17697942):11.6582976):8.971899707,494:30.80717673):1.604209177,((  
(463:3.284417571,464:3.284417571):4.819147828,(465:5.905310299,466:5.  
905310299):2.1982551):0.1814086027,462:8.284974002):0.6348878406,467:8.91  
9861842):1.209987188,468:10.12984903):0.7447355208,469:10.87458455):21.53  
680135):12.18052215,(((498:22.17912874,499:22.17912874):1.618131783,497:2  
3.79726053):14.82793574,(495:12.13869155,496:12.13869155):26.48650473):5.

96671178):0.9998148011,((((((((((((((((((((446:2.990826257,447:2.990826257):6.661528171,448:9.652354428):2.178635698,449:11.83099013):1.91730832,(450:5.156834386,451:5.156834386):8.591464059):1.226610471,452:14.97490892):0.9765521918,445:15.95146111):1.751333713,444:17.70279482):1.859750278,((439:12.11518314,440:12.11518314):3.501905671,441:15.61708881):1.332570408,(442:10.20724281,443:10.20724281):6.742416404):2.612885885):0.4577335519,((437:5.9511002,438:5.9511002):11.24379903,436:17.19489923):2.825379426):0.1359845193,((454:0.9971324389,455:0.9971324389):0.3661444912,453:1.36327693):11.54579113,456:12.90906807):7.247195105):2.416456676,435:22.57271985):0.6192018679,((458:11.30522195,459:11.30522195):5.931546118,457:17.23676807):5.955153646):1.956604648,(460:7.349476749,461:7.349476749):17.79904961):6.111266913,434:31.25979327):1.241094071,433:32.50088735):5.542273353,(431:37.74386163,432:37.74386163):0.2992990685):2.284003498,430:40.3271642):4.460951485,429:44.78811568):0.8036071724):5.245940485,((((((((25:0.8438051024,426:0.8438051024):0.3851974615,427:1.229002564):16.29674732,424:17.52574988):2.368975676,428:19.89472556):0.050735051,((421:3.676282575,422:3.676282575):10.12241914,423:13.79870172):6.146758894):2.350681667,(419:3.837004256,420:3.837004256):18.45913802):20.95020537,(((411:8.388802334,412:8.388802334):25.74977303,(413:19.77797658,414:19.77797658):14.36059879):2.549917793,((417:10.88961301,418:10.88961301):8.563190741,416:19.45280375):5.822557381,415:25.27536113):11.41313203):6.557854483):7.591315697):10.73721029):4.738044794,((((((((27:6.821251439,28:6.821251439):20.95427398,(29:9.86629393,30:9.86629393):17.90923148):1.922730264,31:29.69825568):9.485444436,((25:11.0532105,26:11.0532105):2.372420853,24:13.42563135):3.931274172,23:17.35690552):21.82679459):20.84635282,(((20:8.942317171,21:8.942317171):1.444429789,22:10.38674696):1.446689574,19:11.83343653):30.56335483,(17:24.72535687,18:24.72535687):17.67143449):17.63326157):3.432390846,((((((((12:2.279754479,13:2.279754479):1.987562407,14:4.267316886):3.519604956,15:7.786921842):0.4720082513,(10:0.390519895,11:0.390519895):7.868410198):2.685358305,9:10.9442884):11.21642916,16:22.16071756):2.309703363,(7:12.21111458,8:12.21111458):12.25930634):2.712893608,6:27.18331453):36.27912925):1.900357137,(4:1.148719074,5:1.148719074):64.21408184):0.9501175084):21.52526525):0.3934027931,((((((((1038:19.33282074,1039:19.33282074):1.391432048,(1040:17.96409218,1041:17.96409218):2.760160608):7.972296023,1042:28.69654882):5.103460271,((1043:16.16515544,1044:16.16515544):5.952034875,(1045:4.120422914,1046:4.120422914):17.9967674):11.68281878):16.62785534,1037:50.42786443):17.96585483,(((1049:8.694546421,1050:8.694546421):0.3314377733,1048:9.025984194):3.353243001,1051:12.3792272):1.227623804,1047:13.606851):54.78686826):6.920563383,(((1033:5.660069618,1034:5.660069618):8.945788509,(1035:6.484933184,1036:6.484933184):8.120924944):4.397321673,(1031:17.14052616,1032:17.14052616):1.86265364):1.396396547,(1029:13.26819528,1030:13.26819528):7.131381067):29.27145075,((1026:2.07702116,1027:2.07702116):0.2845754757,1028:2.361596635):47.30943046):25.64325554):1.473419738,1025:76.78770238):0.6061276625,(((1023:0.5918510516,1024:0.5918510516):6.428389881,1022:7.020240933):2.864212443,(1020:4.601491782,1021:4.601491782):5.282961594):39.82331222,(1018:3.623614676,1019:3.623614676):46.08415092):3.391673078,(((1015:0.1237164932,1016:0.1237164932):0.3211931813,1014:0.4449096745):8.066637909,1017:8.511547583):1.242148442,1013:9.753696026):43.34574265):24.29439136):2.771751209,(((1058:5.710420124,1059:5.710420124):0.9773501783,1057:6.687770302):2.423073266,1056:9.110843568):14.98678342,((1062:14.04505184,1063:14.04505184):0.7975041565,1061:14.842556):7.426744447,1060:22.26930045):1.828326542):3.987520372,((1054:1.033828248,1055:1.033828248):3.125383734,1053:4.159211982):11.00999327,1052:15.16920526):12.91594211):27.9682,(((1064:0.7638346988,1065:0.7638346988):5.95154894,1066:6.715383638):26.03496795,1067:32.75035159):13.60540042,((1068:3.365146347,1069:3.365146347):19.32115351,(1070:4.15686875,1071:4.15686875):18.5294311):23.66945216):9.697595354):24.11223388):8.066005221):68.88243058,((((((((((((((((1121:0.0

6444800015,1122:0.06444800015):2.75679645,1120:2.821244451):0.3931723723,  
(1123:2.486771556,1124:2.486771556):0.7276452669):1.174885921,1125:4.3893  
02743):0.3357107591,((1117:0.8463765755,1118:0.8463765755):2.19150689,111  
9:3.037883466):1.687130037):0.6752748356,(1115:1.95841204,1116:1.95841204  
) :3.441876298):3.708519882,(((1111:4.258107287,1112:4.258107287):2.15870  
8726,(1113:1.01739183,1114:1.01739183):5.399424183):0.8538062334,(1109:2.  
323740021,1110:2.323740021):4.946882225):0.7585950221,1108:8.029217269):1  
.079590951):0.42015419,1126:9.52896241):7.23580266,(((1129:3.493002352,11  
30:3.493002352):7.45572895,1131:10.9487313):2.604233532,(1127:6.893544497  
,1128:6.893544497):6.659420337):3.211800237):7.39580051,1107:24.16056558)  
:13.00381083,(((1134:1.071548687,1135:1.071548687):1.921293814,1136:2.992  
842501):25.23645291,(1132:19.63595362,1133:19.63595362):8.593341789):8.93  
5081005):0.7650825358,(((1105:4.446613602,1106:4.446613602):4.993169412,  
1104:9.439783014):5.837336663,1103:15.27711968):18.06470069,1102:33.34182  
036):4.587638586):4.983076202,((1100:4.628790836,1101:4.628790836):20.822  
41661,1099:25.45120744):17.46132771):9.77474433,(((((((1092:6.943547772,  
1093:6.943547772):2.17653458,1091:9.120082352):3.945415008,(1094:8.633748  
892,1095:8.633748892):4.431748467):5.196091636,1096:18.261589):1.88673900  
3,1097:20.148328):9.757368874,1098:29.90569687):21.45187682,((1087:3.252  
943113,1088:3.252943113):3.648075454,(1089:3.040553429,1090:3.040553429):  
3.860465138):19.32630253,1086:26.2273211):25.13025259):0.7332686948,(1084  
:6.579845953,1085:6.579845953):45.51099643):0.5964370988):3.394260472,108  
3:56.08153995):12.18908028,(((((((1079:2.348031726,1080:2.348031726):2.7  
48160268,1078:5.096191994):5.920761796,1081:11.01695379):7.774662766,1077  
:18.79161656):8.668955292,1076:27.46057185):2.35046066,1075:29.81103251):  
3.364366655,1074:33.17539916):1.644463016,1082:34.81986218):33.45075805):  
5.165559667,(1072:16.32065977,1073:16.32065977):57.11552013):83.67783715)  
:24.89488856,((1:11.50274145,2:11.50274145):33.46755395,3:44.97029541):13  
7.0386102);

END;
