# Supplementary material for: Divergent vertebral formulae shape the evolution of axial complexity in mammals
Source: Nat Ecol Evol. 2023 Mar 6;7(3):367–81. doi: 10.1038/s41559-023-01982-5 (PMC9998275; doi:10.1038/s41559-023-01982-5)
Supplement: Source Data Extended Data Fig. 1 — Tabulations of two presacral and one thoracolumbar complexity indices re-ordered by group. Each tabulation is reported in a separate Excel sheet. [file 41559_2023_1982_MOESM12_ESM.xlsx]

## Sheet: Brillouin_CTL
	Brillouin_CTL
Zaglossus_bruijnii	0.810052
Tachyglossus_aculeatus	0.779728
Ornithorhynchus_anatinus	0.713012
Solenodon_paradoxus	0.821573
Solenodon_cubanus	0.833047
Galemys_pyrenaicus	0.875301
Scapanus_latimanus	0.875301
Scalopus_aquaticus	0.875301
Talpa_europaea	0.907889
Euroscaptor_mizura	0.907889
Euroscaptor_micrura	0.885552
Mogera_tokudae	0.907889
Mogera_imaizumii	0.875301
Mogera_wogura	0.875301
Euroscaptor_subanura	0.907889
Condylura_cristata	0.907889
Hylomys_suillus	0.898589
Echinosorex_gymnura	0.888788
Erinaceus_europaeus	0.888788
Paraechinus_micropus	0.875301
Hemiechinus_auritus	0.875301
Atelerix_algirus	0.853758
Scutisorex_somereni	0.952019
Suncus_madagascariensis	0.864652
Crocidura_crenata	0.907889
Crocidura_canariensis	0.875301
Sorex_araneus	0.898589
Sorex_minutus	0.898589
Cryptotis_parva	0.907889
Blarina_hylophaga	0.924261
Notiosorex_crawfordi	0.907889
Smutsia_gigantea	0.875301
Phataginus_tricuspis	0.898589
Manis_pentadactyla	0.878647
Urocyon_cinereoargenteus	0.924261
Vulpes_lagopus	0.924261
Vulpes_zerda	0.924261
Vulpes_vulpes	0.924261
Otocyon_megalotis	0.924261
Nyctereutes_procyonoides	0.924261
Lycaon_pictus	0.924261
Chrysocyon_brachyurus	0.924261
Canis_mesomelas	0.924261
Canis_simensis	0.924261
Canis_latrans	0.924261
Canis_aureus	0.924261
Canis_lupus	0.924261
Cuon_alpinus	0.924261
Canis_adustus	0.924261
Pseudalopex_gymnocercus	0.924261
Speothos_venaticus	0.924261
Cerdocyon_thous	0.924261
Neomonachus_tropicalis	0.864652
Monachus_monachus	0.864652
Mirounga_leonina	0.864652
Mirounga_angustirostris	0.864652
Lobodon_carcinophaga	0.864652
Leptonychotes_weddellii	0.864652
Ommatophoca_rossii	0.864652
Hydrurga_leptonyx	0.898589
Erignathus_barbatus	0.864652
Pagophilus_groenlandicus	0.864652
Phoca_vitulina	0.864652
Pusa_hispida	0.864652
Halichoerus_grypus	0.864652
Cystophora_cristata	0.864652
Odobenus_rosmarus	0.864652
Callorhinus_ursinus	0.864652
Zalophus_californianus	0.864652
Zalophus_japonicus	0.864652
Eumetopias_jubatus	0.864652
Arctocephalus_pusillus	0.864652
Neophoca_cinerea	0.864652
Otaria_bryonia	0.864652
Arctocephalus_tropicalis	0.864652
Arctocephalus_forsteri	0.864652
Arctocephalus_australis	0.864652
Mydaus_javanensis	0.898589
Spilogale_gracilis	0.916007
Mephitis_mephitis	0.878647
Conepatus_humboldtii	0.853758
Conepatus_chinga	0.853758
Potos_flavus	0.898589
Procyon_lotor	0.898589
Procyon_cancrivorus	0.898589
Bassariscus_astutus	0.924261
Nasua_nasua	0.898589
Nasua_narica	0.864652
Bassaricyon_alleni	0.924261
Taxidea_taxus	0.898589
Meles_meles	0.864652
Meles_anakuma	0.864652
Arctonyx_collaris	0.821573
Mellivora_capensis	0.833047
Gulo_gulo	0.864652
Martes_flavigula	0.898589
Martes_foina	0.898589
Martes_zibellina	0.898589
Martes_martes	0.898589
Martes_americana	0.898589
Martes_pennanti	0.898589
Eira_barbara	0.898589
Melogale_orientalis	0.898589
Neovison_vison	0.898589
Mustela_frenata	0.898589
Mustela_felipei	0.898589
Mustela_erminea	0.898589
Mustela_nivalis	0.898589
Mustela_sibirica	0.898589
Mustela_nigripes	0.898589
Mustela_lutreolina	0.898589
Mustela_putorius	0.898589
Ictonyx_libyca	0.864652
Galictis_vittata	0.853758
Lyncodon_patagonicus	0.821573
Galictis_cuja	0.864652
Pteronura_brasiliensis	0.864652
Lontra_longicaudis	0.864652
Lontra_provocax	0.864652
Lontra_canadensis	0.898589
Enhydra_lutris	0.888788
Lutra_maculicollis	0.898589
Lutra_lutra	0.898589
Aonyx_cinerea	0.898589
Lutrogale_perspicillata	0.898589
Aonyx_capensis	0.898589
Ailurus_fulgens	0.898589
Ursus_maritimus	0.898589
Ursus_arctos	0.833047
Melursus_ursinus	0.864652
Ursus_thibetanus	0.898589
Ursus_americanus	0.898589
Helarctos_malayanus	0.833047
Ailuropoda_melanoleuca	0.885552
Nandinia_binotata	0.924261
Hyaena_hyaena	0.833047
Hyaena_brunnea	0.821573
Proteles_cristata	0.864652
Crocuta_crocuta	0.864652
Eupleres_goudotii	0.924261
Salanoia_concolor	0.924261
Galidictis_fasciata	0.898589
Galidia_elegans	0.924261
Cryptoprocta_ferox	0.924261
Herpestes_vitticollis	0.924261
Herpestes_javanicus	0.924261
Herpestes_edwardsii	0.924261
Herpestes_ichneumon	0.924261
Ichneumia_albicauda	0.924261
Cynictis_penicillata	0.924261
Bdeogale_crassicauda	0.898589
Crossarchus_obscurus	0.898589
Helogale_parvula	0.924261
Liberiictis_kuhni	0.924261
Mungos_mungo	0.898589
Suricata_suricatta	0.898589
Genetta_maculata	0.924261
Genetta_tigrina	0.924261
Genetta_genetta	0.924261
Genetta_servalina	0.924261
Viverricula_indica	0.924261
Viverra_tangalunga	0.924261
Viverra_zibetha	0.924261
Civettictis_civetta	0.898589
Macrogalidia_musschenbroekii	0.931699
Cynogale_bennettii	0.898589
Hemigalus_derbyanus	0.924261
Paradoxurus_hermaphroditus	0.924261
Arctictis_binturong	0.924261
Prionodon_pardicolor	0.931699
Prionodon_linsang	0.931699
Neofelis_nebulosa	0.924261
Panthera_tigris	0.924261
Panthera_onca	0.924261
Panthera_uncia	0.924261
Panthera_pardus	0.924261
Panthera_leo	0.924261
Lynx_rufus	0.924261
Lynx_lynx	0.924261
Lynx_canadensis	0.924261
Acinonyx_jubatus	0.924261
Puma_concolor	0.924261
Felis_catus	0.924261
Felis_silvestris	0.924261
Leopardus_pardalis	0.924261
Leopardus_wiedii	0.924261
Leopardus_tigrinus	0.924261
Prionailurus_bengalensis	0.924261
Leptailurus_serval	0.924261
Caracal_caracal	0.924261
Equus_africanus	0.831671
Equus_grevyi	0.857818
Equus_quagga	0.857818
Equus_zebra	0.857818
Equus_hemionus	0.857818
Equus_caballus	0.820635
Equus_ferus	0.857818
Tapirus_indicus	0.831671
Tapirus_terrestris	0.831671
Tapirus_bairdii	0.831671
Rhinoceros_unicornis	0.744836
Rhinoceros_sondaicus	0.744836
Dicerorhinus_sumatrensis	0.744836
Diceros_bicornis	0.733523
Ceratotherium_simum	0.744836
Vicugna_pacos	0.931699
Vicugna_vicugna	0.931699
Lama_glama	0.931699
Camelus_dromedarius	0.924084
Camelus_ferus	0.931699
Tayassu_pecari	0.898589
Pecari_tajacu	0.875301
Sus_scrofa	0.907889
Sus_barbatus	0.85539
Potamochoerus_porcus	0.875301
Phacochoerus_africanus	0.907889
Phacochoerus_aethiopicus	0.885552
Hylochoerus_meinertzhageni	0.875301
Babyrousa_babyrussa	0.907889
Hippopotamus_amphibius	0.833047
Choeropsis_liberiensis	0.833047
Indopacetus_pacificus	0.909729
Kogia_sima	0.949217
Kogia_breviceps	0.949126
Physeter_macrocephalus	0.947293
Platanista_gangetica	0.950777
Pontoporia_blainvillei	0.930341
Inia_geoffrensis	0.814678
Inia_araguaiaensis	0.836234
Lipotes_vexillifer	0.942916
Delphinapterus_leucas	0.952898
Mesoplodon_bowdoini	0.956428
Monodon_monoceros	0.952898
Neophocaena_phocaenoides	0.952019
Phocoenoides_dalli	0.908814
Phocoena_phocoena	0.950361
Phocoena_spinipinnis	0.947334
Phocoena_dioptrica	0.949388
Lagenorhynchus_acutus	0.933412
Lagenorhynchus_albirostris	0.913174
Orcinus_orca	0.949126
Orcaella_brevirostris	0.950361
Grampus_griseus	0.939141
Pseudorca_crassidens	0.956428
Peponocephala_electra	0.947334
Globicephala_melas	0.948102
Globicephala_macrorhynchus	0.954785
Feresa_attenuata	0.941484
Steno_bredanensis	0.946152
Sotalia_guianensis	0.954601
Sotalia_fluviatilis	0.954601
Tursiops_truncatus	0.950361
Stenella_attenuata	0.923919
Lagenodelphis_hosei	0.908959
Stenella_longirostris	0.933412
Sousa_chinensis	0.949126
Tursiops_aduncus	0.950361
Stenella_frontalis	0.944388
Stenella_coeruleoalba	0.933412
Stenella_clymene	0.941083
Delphinus_delphis	0.920842
Delphinus_capensis	0.926395
Lagenorhynchus_obscurus	0.91008
Lagenorhynchus_obliquidens	0.915012
Lagenorhynchus_cruciger	0.91008
Lagenorhynchus_australis	0.950361
Cephalorhynchus_hectori	0.936173
Cephalorhynchus_heavisidii	0.928578
Cephalorhynchus_eutropia	0.943625
Cephalorhynchus_commersonii	0.947417
Berardius_bairdii	0.952019
Berardius_arnuxii	0.953112
Mesoplodon_bidens	0.956428
Ziphius_cavirostris	0.956428
Mesoplodon_stejnegeri	0.952898
Hyperoodon_planifrons	0.955012
Hyperoodon_ampullatus	0.955012
Mesoplodon_hectori	0.955638
Mesoplodon_carlhubbsi	0.955638
Mesoplodon_layardii	0.956428
Mesoplodon_mirus	0.956428
Mesoplodon_europaeus	0.956428
Mesoplodon_densirostris	0.956428
Mesoplodon_grayi	0.955638
Tasmacetus_shepherdi	0.956428
Eubalaena_glacialis	0.950026
Eubalaena_japonica	0.948102
Balaenoptera_physalus	0.947334
Balaenoptera_musculus	0.944388
Balaenoptera_omurai	0.952919
Balaenoptera_borealis	0.950361
Balaenoptera_edeni	0.952272
Mesoplodon_perrini	0.955638
Balaenoptera_bonaerensis	0.954785
Mesoplodon_peruvianus	0.956428
Lissodelphis_peronii	0.850128
Lissodelphis_borealis	0.851792
Balaena_mysticetus	0.953112
Caperea_marginata	0.767983
Balaenoptera_acutorostrata	0.954785
Mesoplodon_ginkgodens	0.955638
Megaptera_novaeangliae	0.948102
Eschrichtius_robustus	0.950026
Moschiola_meminna	0.907889
Moschiola_indica	0.907889
Tragulus_javanicus	0.907889
Tragulus_kanchil	0.907889
Tragulus_napu	0.907889
Okapia_johnstoni	0.875301
Giraffa_camelopardalis	0.875301
Antilocapra_americana	0.907889
Muntiacus_muntjak	0.907889
Dama_dama	0.907889
Elaphurus_davidianus	0.907889
Rusa_unicolor	0.907889
Cervus_elaphus	0.907889
Axis_calamianensis	0.907889
Axis_axis	0.907889
Rangifer_tarandus	0.875301
Odocoileus_virginianus	0.907889
Odocoileus_hemionus	0.907889
Mazama_gouazoubira	0.907889
Blastocerus_dichotomus	0.916479
Pudu_puda	0.907889
Hydropotes_inermis	0.916479
Capreolus_capreolus	0.907889
Alces_alces	0.907889
Moschus_moschiferus	0.875301
Moschus_berezovskii	0.907889
Boselaphus_tragocamelus	0.907889
Tetracerus_quadricornis	0.907889
Tragelaphus_imberbis	0.907889
Tragelaphus_angasii	0.907889
Tragelaphus_scriptus	0.907889
Tragelaphus_eurycerus	0.907889
Tragelaphus_spekii	0.907889
Tragelaphus_buxtoni	0.907889
Tragelaphus_strepsiceros	0.907889
Syncerus_caffer	0.907889
Bubalus_mindorensis	0.907889
Bubalus_depressicornis	0.924261
Bubalus_arnee	0.907889
Bos_gaurus	0.907889
Bos_taurus	0.907889
Bos_indicus	0.907889
Bison_bonasus	0.875301
Bos_mutus	0.875301
Bos_grunniens	0.875301
Bison_bison	0.875301
Nesotragus_moschatus	0.907889
Aepyceros_melampus	0.907889
Pelea_capreolus	0.907889
Redunca_fulvorufula	0.907889
Redunca_redunca	0.907889
Redunca_arundinum	0.907889
Kobus_megaceros	0.907889
Kobus_leche	0.907889
Kobus_vardonii	0.907889
Kobus_kob	0.907889
Kobus_ellipsiprymnus	0.907889
Ourebia_ourebi	0.907889
Raphicerus_melanotis	0.907889
Raphicerus_sharpei	0.907889
Raphicerus_campestris	0.907889
Madoqua_kirkii	0.907889
Madoqua_guentheri	0.907889
Saiga_tatarica	0.931699
Nanger_granti	0.907889
Eudorcas_rufifrons	0.907889
Gazella_dorcas	0.907889
Gazella_gazella	0.907889
Gazella_spekei	0.907889
Antilope_cervicapra	0.907889
Litocranius_walleri	0.907889
Antidorcas_marsupialis	0.907889
Neotragus_pygmaeus	0.907153
Oreotragus_oreotragus	0.907889
Philantomba_monticola	0.875301
Sylvicapra_grimmia	0.875301
Cephalophus_silvicultor	0.875301
Cephalophus_dorsalis	0.875301
Cephalophus_leucogaster	0.875301
Cephalophus_nigrifrons	0.875301
Cephalophus_natalensis	0.875301
Cephalophus_weynsi	0.875301
Ovibos_moschatus	0.907889
Capricornis_crispus	0.907889
Ovis_canadensis	0.907889
Ovis_orientalis	0.907889
Ovis_aries	0.924261
Ovis_ammon	0.907889
Capra_ibex	0.907889
Capra_hircus	0.907889
Pseudois_nayaur	0.907889
Myotragus_balearicus	0.916479
Oreamnos_americanus	0.907889
Rupicapra_rupicapra	0.907889
Ammotragus_lervia	0.907889
Connochaetes_taurinus	0.907889
Connochaetes_gnou	0.898589
Damaliscus_pygargus	0.907889
Damaliscus_lunatus	0.907889
Beatragus_hunteri	0.907889
Alcelaphus_buselaphus	0.907889
Hippotragus_niger	0.907889
Hippotragus_equinus	0.898589
Oryx_dammah	0.907889
Oryx_leucoryx	0.907889
Oryx_gazella	0.907889
Oryx_beisa	0.907889
Rhinopoma_hardwickii	0.865924
Rhinopoma_microphyllum	0.916479
Lavia_frons	0.865924
Megaderma_spasma	0.85539
Rhinolophus_hipposideros	0.916479
Asellia_tridens	0.938039
Hipposideros_caffer	0.916479
Hipposideros_diadema	0.938039
Cynopterus_titthaecheilus	0.875301
Cynopterus_brachyotis	0.844367
Epomops_franqueti	0.885552
Hypsignathus_monstrosus	0.791497
Rousettus_aegyptiacus	0.885552
Eidolon_helvum	0.814678
Pteropus_giganteus	0.885552
Pteropus_rufus	0.895203
Pteropus_vampyrus	0.885552
Macroglossus_minimus	0.85539
Myzopoda_aurita	0.885552
Mystacina_tuberculata	0.885552
Thyroptera_discifera	0.895203
Noctilio_leporinus	0.924084
Pteronotus_parnellii	0.885552
Mormoops_megalophylla	0.907889
Micronycteris_microtis	0.885552
Anoura_caudifer	0.85539
Glossophaga_soricina	0.895203
Glossophaga_morenoi	0.895203
Phylloderma_stenops	0.885552
Phyllostomus_discolor	0.916479
Lonchorhina_inusitata	0.916479
Chrotopterus_auritus	0.916479
Vampyrum_spectrum	0.916479
Lonchophylla_inexpectata	0.865924
Carollia_perspicillata	0.895203
Artibeus_jamaicensis	0.885552
Artibeus_planirostris	0.865924
Pygoderma_bilabiatum	0.895203
Vampyressa_pusilla	0.85539
Sturnira_erythromos	0.865924
Sturnira_aratathomasi	0.895203
Rhinophylla_pumilio	0.875712
Lonchorhina_orinocensis	0.916479
Lonchorhina_fernandezi	0.916479
Lonchorhina_marinkellei	0.916479
Lonchorhina_aurita	0.916479
Diphylla_ecaudata	0.895203
Desmodus_rotundus	0.895203
Diaemus_youngi	0.924084
Macrotus_waterhousii	0.916479
Macrotus_californicus	0.916479
Nyctinomops_macrotis	0.907889
Molossus_molossus	0.924084
Promops_nasutus	0.907889
Molossops_temminckii	0.907889
Cynomops_planirostris	0.885552
Eumops_perotis	0.907889
Tadarida_brasiliensis	0.907889
Molossus_currentium	0.924084
Myotis_daubentonii	0.903988
Myotis_keaysi	0.903988
Myotis_velifer	0.903988
Myotis_chiloensis	0.903988
Myotis_lucifugus	0.875712
Myotis_evotis	0.903988
Eptesicus_nilssonii	0.903988
Eptesicus_serotinus	0.903988
Histiotus_montanus	0.903988
Histiotus_magellanicus	0.865924
Eptesicus_diminutus	0.903988
Lasionycteris_noctivagans	0.903988
Pipistrellus_pipistrellus	0.865924
Nyctalus_noctula	0.903988
Vespertilio_murinus	0.931699
Chalinolobus_tuberculatus	0.903988
Neoromicia_nana	0.903988
Lasiurus_cinereus	0.903988
Lasiurus_ega	0.903988
Antrozous_pallidus	0.903988
Otonycteris_hemprichii	0.924084
Plecotus_auritus	0.903988
Euderma_maculatum	0.903988
Barbastella_barbastellus	0.903988
Miniopterus_schreibersii	0.895203
Nycteris_javanica	0.895203
Nycteris_thebaica	0.875712
Saccopteryx_bilineata	0.916479
Peropteryx_leucoptera	0.907889
Balantiopteryx_plicata	0.931699
Galeopterus_variegatus	0.907889
Cynocephalus_volans	0.907889
Nycticebus_coucang	0.897868
Loris_tardigradus	0.9126
Otolemur_garnettii	0.898589
Otolemur_crassicaudatus	0.924261
Galago_senegalensis	0.907889
Euoticus_elegantulus	0.907889
Perodicticus_potto	0.878647
Arctocebus_calabarensis	0.916007
Daubentonia_madagascariensis	0.907889
Indri_indri	0.949126
Propithecus_diadema	0.942243
Propithecus_verreauxi	0.942243
Propithecus_coquereli	0.942243
Avahi_laniger	0.949126
Varecia_variegata	0.931699
Lemur_catta	0.931699
Hapalemur_griseus	0.931699
Eulemur_macaco	0.931699
Eulemur_rubriventer	0.931699
Eulemur_mongoz	0.931699
Eulemur_collaris	0.931699
Eulemur_fulvus	0.931699
Eulemur_sanfordi	0.931699
Eulemur_albifrons	0.931699
Lepilemur_mustelinus	0.949126
Cheirogaleus_medius	0.898589
Microcebus_murinus	0.924261
Microcebus_rufus	0.924261
Tarsius_syrichta	0.907889
Pithecia_irrorata	0.907889
Pithecia_monachus	0.907889
Pithecia_pithecia	0.907889
Cacajao_melanocephalus	0.907889
Callicebus_moloch	0.907889
Leontocebus_nigricollis	0.931699
Saguinus_oedipus	0.931699
Leontopithecus_rosalia	0.931699
Mico_humeralifer	0.931699
Callithrix_jacchus	0.907889
Cebuella_pygmaea	0.907889
Saimiri_sciureus	0.924261
Cebus_olivaceus	0.875301
Cebus_albifrons	0.898589
Cebus_capucinus	0.907889
Aotus_azarae	0.928829
Aotus_nancymaae	0.928829
Alouatta_seniculus	0.875301
Alouatta_caraya	0.875301
Alouatta_palliata	0.875301
Alouatta_pigra	0.875301
Lagothrix_lagotricha	0.844367
Brachyteles_hypoxanthus	0.885552
Brachyteles_arachnoides	0.844367
Ateles_geoffroyi	0.844367
Ateles_fusciceps	0.844367
Ateles_paniscus	0.85539
Ateles_chamek	0.844367
Ateles_belzebuth	0.844367
Symphalangus_syndactylus	0.885552
Hylobates_pileatus	0.895203
Hylobates_lar	0.885552
Hylobates_muelleri	0.885552
Hylobates_moloch	0.885552
Hylobates_klossii	0.885552
Hylobates_agilis	0.885552
Nomascus_concolor	0.885552
Nomascus_gabriellae	0.875301
Nomascus_leucogenys	0.875301
Hoolock_hoolock	0.885552
Pongo_pygmaeus	0.865924
Pongo_abelii	0.865924
Pan_troglodytes	0.85539
Pan_paniscus	0.85539
Homo_sapiens	0.895203
Gorilla_gorilla	0.85539
Gorilla_beringei	0.814678
Semnopithecus_schistaceus	0.931699
Trachypithecus_cristatus	0.931699
Trachypithecus_phayrei	0.931699
Semnopithecus_entellus	0.931699
Presbytis_rubicunda	0.931699
Presbytis_melalophos	0.931699
Rhinopithecus_bieti	0.931699
Rhinopithecus_roxellana	0.931699
Nasalis_larvatus	0.931699
Colobus_guereza	0.931699
Colobus_vellerosus	0.931699
Macaca_leonina	0.931699
Macaca_sinica	0.931699
Macaca_silenus	0.931699
Macaca_nemestrina	0.931699
Macaca_maura	0.931699
Macaca_radiata	0.931699
Macaca_fascicularis	0.931699
Macaca_arctoides	0.931699
Macaca_nigra	0.931699
Macaca_fuscata	0.931699
Macaca_mulatta	0.931699
Macaca_sylvanus	0.931699
Theropithecus_gelada	0.907889
Papio_cynocephalus	0.907889
Papio_papio	0.907889
Papio_hamadryas	0.907889
Papio_anubis	0.907889
Lophocebus_aterrimus	0.907889
Lophocebus_albigena	0.907889
Cercocebus_atys	0.931699
Mandrillus_sphinx	0.931699
Mandrillus_leucophaeus	0.931699
Cercopithecus_mitis	0.931699
Cercopithecus_ascanius	0.931699
Erythrocebus_patas	0.931699
Chlorocebus_pygerythrus	0.931699
Chlorocebus_aethiops	0.931699
Chlorocebus_cynosuros	0.931699
Chlorocebus_sabaeus	0.931699
Miopithecus_talapoin	0.907889
Ptilocercus_lowii	0.875301
Tupaia_glis	0.907889
Tupaia_nicobarica	0.907889
Urogale_everetti	0.907889
Tupaia_tana	0.907889
Dendrogale_melanura	0.907889
Anathana_ellioti	0.907889
Sylvilagus_audubonii	0.931699
Oryctolagus_cuniculus	0.931699
Pentalagus_furnessi	0.931699
Lepus_californicus	0.931699
Lepus_alleni	0.931699
Lepus_townsendii	0.931699
Lepus_timidus	0.931699
Lepus_europaeus	0.931699
Lepus_americanus	0.931699
Nesolagus_timminsi	0.931699
Nesolagus_netscheri	0.931699
Ochotona_hyperborea	0.798565
Ochotona_princeps	0.842735
Muscardinus_avellanarius	0.907889
Aplodontia_rufa	0.907889
Ratufa_indica	0.907889
Callosciurus_erythraeus	0.931699
Tamias_striatus	0.931699
Tamias_minimus	0.931699
Spermophilus_dauricus	0.931699
Ictidomys_tridecemlineatus	0.911551
Cynomys_ludovicianus	0.931699
Marmota_monax	0.931699
Marmota_caligata	0.931699
Marmota_marmota	0.931699
Marmota_sibirica	0.931699
Sciurus_anomalus	0.931699
Sciurus_niger	0.931699
Sciurus_carolinensis	0.931699
Sciurus_griseus	0.931699
Microsciurus_mimulus	0.931699
Microsciurus_alfari	0.931699
Microsciurus_flaviventer	0.931699
Sciurus_vulgaris	0.931699
Tamiasciurus_hudsonicus	0.931699
Glaucomys_volans	0.931699
Petaurista_leucogenys	0.931699
Petaurista_philippensis	0.931699
Petaurista_alborufus	0.931699
Petaurista_grandis	0.931699
Laonastes_aenigmamus	0.952898
Atherurus_macrourus	0.833047
Hystrix_javanica	0.875301
Hystrix_cristata	0.875301
Thryonomys_swinderianus	0.885552
Heterocephalus_glaber	0.947293
Heliophobius_argenteocinereus	0.916479
Cryptomys_hottentotus	0.907889
Georychus_capensis	0.931699
Bathyergus_suillus	0.924261
Cuniculus_paca	0.907889
Myoprocta_acouchy	0.907889
Dasyprocta_leporina	0.931699
Dasyprocta_azarae	0.924261
Hydrochoerus_hydrochaeris	0.907889
Dolichotis_patagonum	0.931699
Cavia_porcellus	0.907889
Cavia_aperea	0.907889
Erethizon_dorsatum	0.898589
Coendou_prehensilis	0.888788
Lagostomus_maximus	0.931699
Chinchilla_lanigera	0.907889
Chinchilla_chinchilla	0.907889
Phyllomys_sulinus	0.898589
Myocastor_coypus	0.907889
Capromys_pilorides	0.897868
Ctenomys_boliviensis	0.931699
Ctenomys_talarum	0.931699
Octodon_degus	0.931699
Spalacopus_cyanus	0.924261
Dipus_sagitta	0.931699
Jaculus_orientalis	0.931699
Jaculus_jaculus	0.931699
Stylodipus_telum	0.931699
Allactaga_euphratica	0.931699
Allactaga_major	0.907889
Zapus_princeps	0.907889
Sicista_concolor	0.907889
Spalax_leucodon	0.907889
Rhizomys_pruinosus	0.864652
Dicrostonyx_groenlandicus	0.907889
Ondatra_zibethicus	0.907889
Lemmus_sibiricus	0.907889
Synaptomys_cooperi	0.907889
Ellobius_talpinus	0.907889
Microtus_arvalis	0.907889
Microtus_pennsylvanicus	0.907889
Microtus_ochrogaster	0.907889
Microtus_chrotorrhinus	0.907889
Microtus_oeconomus	0.907889
Myodes_gapperi	0.907889
Mesocricetus_auratus	0.907889
Tscherskia_triton	0.907889
Cricetus_cricetus	0.907889
Cricetulus_migratorius	0.907889
Cricetulus_longicaudatus	0.907889
Cricetulus_barabensis	0.907889
Phodopus_sungorus	0.907889
Neotoma_fuscipes	0.907889
Neotoma_lepida	0.907889
Neotoma_floridana	0.907889
Neotoma_albigula	0.907889
Neotoma_mexicana	0.907889
Neotoma_cinerea	0.907889
Hodomys_alleni	0.907889
Nelsonia_neotomodon	0.907889
Xenomys_nelsoni	0.898589
Ochrotomys_nuttalli	0.907889
Reithrodontomys_creper	0.907889
Reithrodontomys_mexicanus	0.907889
Reithrodontomys_fulvescens	0.907889
Reithrodontomys_sumichrasti	0.907889
Reithrodontomys_megalotis	0.907889
Reithrodontomys_humulis	0.907889
Reithrodontomys_montanus	0.907889
Isthmomys_pirrensis	0.907889
Isthmomys_flavidus	0.907889
Onychomys_torridus	0.907889
Onychomys_leucogaster	0.907889
Peromyscus_maniculatus	0.907889
Peromyscus_leucopus	0.907889
Megadontomys_thomasi	0.907889
Peromyscus_yucatanicus	0.907889
Peromyscus_guatemalensis	0.907889
Peromyscus_mexicanus	0.907889
Peromyscus_megalops	0.907889
Peromyscus_melanophrys	0.907889
Habromys_lepturus	0.924261
Habromys_lophurus	0.924261
Peromyscus_crinitus	0.907889
Peromyscus_ochraventer	0.907889
Peromyscus_truei	0.907889
Peromyscus_difficilis	0.907889
Peromyscus_attwateri	0.907889
Peromyscus_furvus	0.907889
Peromyscus_spicilegus	0.907889
Peromyscus_boylii	0.907889
Podomys_floridanus	0.907889
Neotomodon_alstoni	0.907889
Peromyscus_californicus	0.907889
Peromyscus_eremicus	0.907889
Osgoodomys_banderanus	0.907889
Scotinomys_xerampelinus	0.907889
Scotinomys_teguina	0.907889
Baiomys_taylori	0.907889
Baiomys_musculus	0.907889
Tylomys_panamensis	0.898589
Tylomys_mirae	0.898589
Tylomys_watsoni	0.898589
Tylomys_fulviventer	0.898589
Tylomys_nudicaudus	0.898589
Ototylomys_phyllotis	0.888788
Nyctomys_sumichrasti	0.907889
Chibchanomys_trichotis	0.875301
Reithrodon_auritus	0.931699
Rheomys_underwoodi	0.907889
Rheomys_thomasi	0.907889
Rheomys_mexicanus	0.907889
Rheomys_raptor	0.907889
Ichthyomys_pittieri	0.907889
Ichthyomys_hydrobates	0.907889
Ichthyomys_tweedii	0.907889
Neusticomys_venezuelae	0.875301
Neusticomys_ferreirai	0.907889
Neusticomys_monticolus	0.907889
Anotomys_leander	0.898589
Chinchillula_sahamae	0.907889
Sigmodon_leucotis	0.931699
Sigmodon_fulviventer	0.931699
Sigmodon_alleni	0.931699
Sigmodon_ochrognathus	0.931699
Sigmodon_hispidus	0.931699
Rhipidomys_macconnelli	0.907889
Rhipidomys_nitela	0.931699
Rhipidomys_mastacalis	0.931699
Rhipidomys_fulviventer	0.907889
Rhipidomys_venustus	0.907889
Rhipidomys_couesi	0.931699
Rhipidomys_venezuelae	0.931699
Rhipidomys_latimanus	0.907889
Rhipidomys_austrinus	0.907889
Aepeomys_lugens	0.907889
Thomasomys_gracilis	0.907889
Thomasomys_cinereus	0.907889
Thomasomys_rhoadsi	0.907889
Thomasomys_baeops	0.924261
Thomasomys_aureus	0.907889
Thomasomys_pyrrhonotus	0.924261
Thomasomys_daphne	0.907889
Thomasomys_oreas	0.907889
Thomasomys_hylophilus	0.907889
Thomasomys_paramorum	0.907889
Chilomys_instans	0.907889
Akodon_bogotensis	0.931699
Blarinomys_breviceps	0.907889
Scapteromys_tumidus	0.907889
Scapteromys_meridionalis	0.907889
Scapteromys_aquaticus	0.907889
Kunsia_tomentosus	0.916479
Thalpomys_lasiotis	0.907889
Necromys_amoenus	0.907889
Necromys_urichi	0.907889
Necromys_lasiurus	0.931699
Necromys_temchuki	0.907889
Necromys_obscurus	0.907889
Necromys_lactens	0.907889
Akodon_mimus	0.907889
Akodon_azarae	0.907889
Akodon_boliviensis	0.907889
Akodon_subfuscus	0.907889
Akodon_lutescens	0.907889
Akodon_cursor	0.907889
Akodon_simulator	0.907889
Akodon_albiventer	0.907889
Akodon_mollis	0.907889
Akodon_torques	0.907889
Akodon_aerosus	0.907889
Deltamys_kempi	0.907889
Thaptomys_nigrita	0.907889
Oxymycterus_delator	0.907889
Oxymycterus_paramensis	0.907889
Oxymycterus_rufus	0.907889
Oxymycterus_inca	0.907889
Zygodontomys_brevicauda	0.931699
Oecomys_concolor	0.931699
Oecomys_roberti	0.931699
Oecomys_bicolor	0.931699
Oecomys_superans	0.931699
Oecomys_trinitatis	0.931699
Oecomys_mamorae	0.931699
Oecomys_paricola	0.931699
Transandinomys_talamancae	0.931699
Transandinomys_bolivaris	0.931699
Euryoryzomys_nitidus	0.931699
Euryoryzomys_russatus	0.931699
Euryoryzomys_legatus	0.931699
Nephelomys_albigularis	0.931699
Nephelomys_keaysi	0.931699
Hylaeamys_megacephalus	0.931699
Handleyomys_alfaroi	0.931699
Handleyomys_melanotis	0.931699
Handleyomys_chapmani	0.931699
Neacomys_guianae	0.931699
Neacomys_spinosus	0.931699
Neacomys_tenuipes	0.931699
Microryzomys_minutus	0.931699
Microryzomys_altissimus	0.931699
Oligoryzomys_microtis	0.931699
Oligoryzomys_nigripes	0.931699
Oligoryzomys_destructor	0.931699
Oligoryzomys_fulvescens	0.931699
Oligoryzomys_eliurus	0.931699
Oligoryzomys_delticola	0.931699
Oligoryzomys_chacoensis	0.931699
Oligoryzomys_andinus	0.931699
Oligoryzomys_magellanicus	0.931699
Oligoryzomys_longicaudatus	0.931699
Oligoryzomys_flavescens	0.931699
Eremoryzomys_polius	0.931699
Cerradomys_subflavus	0.931699
Sooretamys_angouya	0.931699
Holochilus_brasiliensis	0.931699
Holochilus_chacarius	0.931699
Pseudoryzomys_simplex	0.931699
Lundomys_molitor	0.931699
Nectomys_squamipes	0.931699
Oryzomys_couesi	0.931699
Oryzomys_palustris	0.931699
Sigmodontomys_alfari	0.931699
Melanomys_caliginosus	0.931699
Nesoryzomys_indefessus	0.907889
Irenomys_tarsalis	0.907889
Euneomys_petersoni	0.907889
Euneomys_chinchilloides	0.907889
Andinomys_edax	0.907889
Punomys_kofordi	0.907889
Delomys_sublineatus	0.907889
Delomys_dorsalis	0.907889
Calomys_lepidus	0.907889
Calomys_sorellus	0.907889
Calomys_musculinus	0.907889
Calomys_laucha	0.907889
Calomys_tener	0.931699
Calomys_boliviae	0.931699
Calomys_callosus	0.931699
Calomys_venustus	0.931699
Calomys_hummelincki	0.931699
Eligmodontia_morgani	0.907889
Eligmodontia_puerulus	0.907889
Eligmodontia_moreni	0.931699
Eligmodontia_hirtipes	0.931699
Eligmodontia_bolsonensis	0.931699
Graomys_griseoflavus	0.931699
Graomys_domorum	0.931699
Andalgalomys_pearsoni	0.907889
Andalgalomys_olrogi	0.931699
Salinomys_delicatus	0.931699
Phyllotis_wolffsohni	0.907889
Tapecomys_primus	0.907889
Auliscomys_sublimis	0.907889
Auliscomys_pictus	0.907889
Auliscomys_boliviensis	0.907889
Galenomys_garleppi	0.907889
Loxodontomys_micropus	0.907889
Phyllotis_osilae	0.907889
Phyllotis_alisosiensis	0.907889
Phyllotis_anitae	0.907889
Phyllotis_caprinus	0.907889
Phyllotis_xanthopygus	0.907889
Phyllotis_darwini	0.907889
Phyllotis_amicus	0.907889
Paralomys_gerbillus	0.907889
Phyllotis_haggardi	0.907889
Phyllotis_andium	0.907889
Calassomys_apicalis	0.931699
Akodon_neocenus	0.907889
Wiedomys_pyrrhorhinos	0.931699
Juliomys_pictipes	0.907889
Abrothrix_olivaceus	0.907889
Abrothrix_andinus	0.907889
Abrothrix_jelskii	0.907889
Abrothrix_illuteus	0.907889
Abrothrix_longipilis	0.907889
Abrothrix_sanborni	0.907889
Notiomys_edwardsii	0.907889
Geoxus_valdivianus	0.907889
Chelemys_macronyx	0.907889
Mystromys_albicaudatus	0.907889
Saccostomus_campestris	0.931699
Beamys_hindei	0.907889
Cricetomys_gambianus	0.907889
Brachytarsomys_albicauda	0.924261
Gymnuromys_roberti	0.924261
Eliurus_myoxinus	0.924261
Brachyuromys_ramirohitra	0.924261
Nesomys_rufus	0.924261
Nesomys_audeberti	0.924261
Macrotarsomys_bastardi	0.924261
Calomyscus_baluchi	0.907889
Lophiomys_imhausi	0.897868
Pachyuromys_duprasi	0.931699
Psammomys_obesus	0.931699
Meriones_shawi	0.931699
Meriones_unguiculatus	0.931699
Sekeetamys_calurus	0.931699
Ammodillus_imbellis	0.931699
Microdillus_peeli	0.931699
Gerbillus_cheesmani	0.931699
Taterillus_arenarius	0.931699
Gerbilliscus_nigricaudus	0.931699
Gerbillurus_setzeri	0.931699
Desmodillus_auricularis	0.931699
Tatera_indica	0.931699
Notomys_amplus	0.931699
Conilurus_albipes	0.924261
Hydromys_chrysogaster	0.916007
Mastomys_coucha	0.907889
Mus_musculus	0.931699
Rhabdomys_pumilio	0.931699
Micromys_minutus	0.907889
Maxomys_inflatus	0.907889
Rattus_rattus	0.907889
Rattus_fuscipes	0.907889
Rattus_norvegicus	0.907889
Pedetes_surdaster	0.931699
Pedetes_capensis	0.931699
Anomalurus_pelii	0.93841
Anomalurus_derbianus	0.93841
Anomalurus_beecrofti	0.923722
Anomalurus_pusillus	0.93116
Microdipodops_pallidus	0.931699
Dipodomys_spectabilis	0.931699
Dipodomys_ordii	0.931699
Dipodomys_heermanni	0.931699
Dipodomys_merriami	0.931699
Thomomys_bulbivorus	0.931699
Thomomys_umbrinus	0.931699
Thomomys_bottae	0.931699
Geomys_pinetis	0.931699
Geomys_bursarius	0.931699
Geomys_arenarius	0.907889
Cratogeomys_castanops	0.916479
Liomys_salvini	0.931699
Heteromys_anomalus	0.931699
Perognathus_fasciatus	0.931699
Castor_fiber	0.875301
Castor_canadensis	0.875301
Hydrodamalis_gigas	0.767983
Trichechus_manatus	0.689045
Trichechus_senegalensis	0.689045
Trichechus_inunguis	0.714565
Dugong_dugon	0.744836
Loxodonta_africana	0.733523
Elephas_maximus	0.798565
Procavia_capensis	0.866939
Heterohyrax_brucei	0.838839
Dendrohyrax_validus	0.848204
Dendrohyrax_dorsalis	0.876308
Dendrohyrax_arboreus	0.838839
Orycteropus_afer	0.935993
Rhynchocyon_cirnei	0.924261
Rhynchocyon_chrysopygus	0.935993
Rhynchocyon_petersi	0.935993
Elephantulus_myurus	0.924261
Elephantulus_edwardii	0.898589
Macroscelides_proboscideus	0.898589
Petrodromus_tetradactylus	0.924261
Elephantulus_rufescens	0.924261
Elephantulus_brachyrhynchus	0.898589
Elephantulus_intufi	0.924261
Elephantulus_rupestris	0.898589
Potamogale_velox	0.842735
Limnogale_mergulus	0.842735
Microgale_talazaci	0.897868
Microgale_longicaudata	0.868292
Microgale_cowani	0.842735
Oryzorictes_tetradactylus	0.842735
Tenrec_ecaudatus	0.820635
Hemicentetes_semispinosus	0.810052
Setifer_setosus	0.897868
Echinops_telfairi	0.821573
Eremitalpa_granti	0.713012
Amblysomus_hottentotus	0.744836
Calcochloris_obtusirostris	0.744836
Chrysospalax_trevelyani	0.744836
Chrysochloris_asiatica	0.744836
Dasypus_hybridus	0.917412
Dasypus_novemcinctus	0.911551
Dasypus_kappleri	0.917412
Dasypus_septemcinctus	0.884405
Zaedyus_pichiy	0.836234
Euphractus_sexcinctus	0.836234
Chaetophractus_vellerosus	0.836234
Chaetophractus_villosus	0.836234
Chlamyphorus_truncatus	0.836234
Tolypeutes_matacus	0.836234
Priodontes_maximus	0.875712
Cabassous_unicinctus	0.825775
Tamandua_tetradactyla	0.767983
Tamandua_mexicana	0.767983
Myrmecophaga_tridactyla	0.724537
Cyclopes_didactylus	0.736131
Choloepus_hoffmanni	0.674384
Choloepus_didactylus	0.732807
Bradypus_tridactylus	0.857521
Bradypus_variegatus	0.857521
Rhyncholestes_raphanurus	0.907889
Caenolestes_fuliginosus	0.907889
Glironia_venusta	0.907889
Monodelphis_domestica	0.898589
Gracilinanus_microtarsus	0.885552
Metachirus_nudicaudatus	0.907889
Didelphis_virginiana	0.907889
Didelphis_marsupialis	0.907889
Didelphis_albiventris	0.907889
Chironectes_minimus	0.907889
Caluromys_philander	0.907889
Dromiciops_gliroides	0.885552
Notoryctes_typhlops	0.820635
Notoryctes_caurinus	0.85539
Macrotis_lagotis	0.907889
Isoodon_macrourus	0.907889
Isoodon_obesulus	0.907889
Perameles_gunnii	0.907889
Perameles_nasuta	0.907889
Sarcophilus_harrisii	0.907889
Dasyurus_maculatus	0.907889
Dasyurus_viverrinus	0.907889
Dasyuroides_byrnei	0.907889
Dasycercus_cristicauda	0.907889
Antechinus_flavipes	0.907889
Thylacinus_cynocephalus	0.907889
Myrmecobius_fasciatus	0.907889
Phascolarctos_cinereus	0.947293
Vombatus_ursinus	0.833047
Lasiorhinus_latifrons	0.833047
Cercartetus_concinnus	0.907889
Trichosurus_vulpecula	0.907889
Spilocuscus_maculatus	0.907889
Phalanger_sericeus	0.907889
Phalanger_orientalis	0.907889
Hypsiprymnodon_moschatus	0.907889
Thylogale_billardierii	0.907889
Petrogale_lateralis	0.907889
Petrogale_penicillata	0.907889
Dendrolagus_goodfellowi	0.907889
Dendrolagus_matschiei	0.907889
Dendrolagus_bennettianus	0.907889
Dendrolagus_lumholtzi	0.907889
Macropus_fuliginosus	0.907889
Macropus_giganteus	0.907889
Macropus_antilopinus	0.907889
Macropus_robustus	0.907889
Macropus_rufus	0.907889
Macropus_rufogriseus	0.907889
Macropus_eugenii	0.907889
Macropus_agilis	0.907889
Macropus_parryi	0.907889
Macropus_parma	0.907889
Macropus_irma	0.907889
Dendrolagus_ursinus	0.907889
Potorous_longipes	0.907889
Potorous_tridactylus	0.907889
Bettongia_penicillata	0.907889
Bettongia_gaimardi	0.907889
Aepyprymnus_rufescens	0.907889
Pseudocheirus_peregrinus	0.907889
Petauroides_volans	0.931699
Petaurus_australis	0.907889
Petaurus_norfolcensis	0.907889
Petaurus_breviceps	0.907889

## Sheet: evenness_CTL
	evenness_CTL
Zaglossus_bruijnii	0.834439
Tachyglossus_aculeatus	0.809187
Ornithorhynchus_anatinus	0.739951
Solenodon_paradoxus	0.848211
Solenodon_cubanus	0.864521
Galemys_pyrenaicus	0.908371
Scapanus_latimanus	0.908371
Scalopus_aquaticus	0.908371
Talpa_europaea	0.942191
Euroscaptor_mizura	0.942191
Euroscaptor_micrura	0.922735
Mogera_tokudae	0.942191
Mogera_imaizumii	0.908371
Mogera_wogura	0.908371
Euroscaptor_subanura	0.942191
Condylura_cristata	0.942191
Hylomys_suillus	0.927725
Echinosorex_gymnura	0.915545
Erinaceus_europaeus	0.915545
Paraechinus_micropus	0.908371
Hemiechinus_auritus	0.908371
Atelerix_algirus	0.879461
Scutisorex_somereni	0.971413
Suncus_madagascariensis	0.892687
Crocidura_crenata	0.942191
Crocidura_canariensis	0.908371
Sorex_araneus	0.927725
Sorex_minutus	0.927725
Cryptotis_parva	0.942191
Blarina_hylophaga	0.954229
Notiosorex_crawfordi	0.942191
Smutsia_gigantea	0.908371
Phataginus_tricuspis	0.927725
Manis_pentadactyla	0.902089
Urocyon_cinereoargenteus	0.954229
Vulpes_lagopus	0.954229
Vulpes_zerda	0.954229
Vulpes_vulpes	0.954229
Otocyon_megalotis	0.954229
Nyctereutes_procyonoides	0.954229
Lycaon_pictus	0.954229
Chrysocyon_brachyurus	0.954229
Canis_mesomelas	0.954229
Canis_simensis	0.954229
Canis_latrans	0.954229
Canis_aureus	0.954229
Canis_lupus	0.954229
Cuon_alpinus	0.954229
Canis_adustus	0.954229
Pseudalopex_gymnocercus	0.954229
Speothos_venaticus	0.954229
Cerdocyon_thous	0.954229
Neomonachus_tropicalis	0.892687
Monachus_monachus	0.892687
Mirounga_leonina	0.892687
Mirounga_angustirostris	0.892687
Lobodon_carcinophaga	0.892687
Leptonychotes_weddellii	0.892687
Ommatophoca_rossii	0.892687
Hydrurga_leptonyx	0.927725
Erignathus_barbatus	0.892687
Pagophilus_groenlandicus	0.892687
Phoca_vitulina	0.892687
Pusa_hispida	0.892687
Halichoerus_grypus	0.892687
Cystophora_cristata	0.892687
Odobenus_rosmarus	0.892687
Callorhinus_ursinus	0.892687
Zalophus_californianus	0.892687
Zalophus_japonicus	0.892687
Eumetopias_jubatus	0.892687
Arctocephalus_pusillus	0.892687
Neophoca_cinerea	0.892687
Otaria_bryonia	0.892687
Arctocephalus_tropicalis	0.892687
Arctocephalus_forsteri	0.892687
Arctocephalus_australis	0.892687
Mydaus_javanensis	0.927725
Spilogale_gracilis	0.943584
Mephitis_mephitis	0.902089
Conepatus_humboldtii	0.879461
Conepatus_chinga	0.879461
Potos_flavus	0.927725
Procyon_lotor	0.927725
Procyon_cancrivorus	0.927725
Bassariscus_astutus	0.954229
Nasua_nasua	0.927725
Nasua_narica	0.892687
Bassaricyon_alleni	0.954229
Taxidea_taxus	0.927725
Meles_meles	0.892687
Meles_anakuma	0.892687
Arctonyx_collaris	0.848211
Mellivora_capensis	0.864521
Gulo_gulo	0.892687
Martes_flavigula	0.927725
Martes_foina	0.927725
Martes_zibellina	0.927725
Martes_martes	0.927725
Martes_americana	0.927725
Martes_pennanti	0.927725
Eira_barbara	0.927725
Melogale_orientalis	0.927725
Neovison_vison	0.927725
Mustela_frenata	0.927725
Mustela_felipei	0.927725
Mustela_erminea	0.927725
Mustela_nivalis	0.927725
Mustela_sibirica	0.927725
Mustela_nigripes	0.927725
Mustela_lutreolina	0.927725
Mustela_putorius	0.927725
Ictonyx_libyca	0.892687
Galictis_vittata	0.879461
Lyncodon_patagonicus	0.848211
Galictis_cuja	0.892687
Pteronura_brasiliensis	0.892687
Lontra_longicaudis	0.892687
Lontra_provocax	0.892687
Lontra_canadensis	0.927725
Enhydra_lutris	0.915545
Lutra_maculicollis	0.927725
Lutra_lutra	0.927725
Aonyx_cinerea	0.927725
Lutrogale_perspicillata	0.927725
Aonyx_capensis	0.927725
Ailurus_fulgens	0.927725
Ursus_maritimus	0.927725
Ursus_arctos	0.864521
Melursus_ursinus	0.892687
Ursus_thibetanus	0.927725
Ursus_americanus	0.927725
Helarctos_malayanus	0.864521
Ailuropoda_melanoleuca	0.922735
Nandinia_binotata	0.954229
Hyaena_hyaena	0.864521
Hyaena_brunnea	0.848211
Proteles_cristata	0.892687
Crocuta_crocuta	0.892687
Eupleres_goudotii	0.954229
Salanoia_concolor	0.954229
Galidictis_fasciata	0.927725
Galidia_elegans	0.954229
Cryptoprocta_ferox	0.954229
Herpestes_vitticollis	0.954229
Herpestes_javanicus	0.954229
Herpestes_edwardsii	0.954229
Herpestes_ichneumon	0.954229
Ichneumia_albicauda	0.954229
Cynictis_penicillata	0.954229
Bdeogale_crassicauda	0.927725
Crossarchus_obscurus	0.927725
Helogale_parvula	0.954229
Liberiictis_kuhni	0.954229
Mungos_mungo	0.927725
Suricata_suricatta	0.927725
Genetta_maculata	0.954229
Genetta_tigrina	0.954229
Genetta_genetta	0.954229
Genetta_servalina	0.954229
Viverricula_indica	0.954229
Viverra_tangalunga	0.954229
Viverra_zibetha	0.954229
Civettictis_civetta	0.927725
Macrogalidia_musschenbroekii	0.9669
Cynogale_bennettii	0.927725
Hemigalus_derbyanus	0.954229
Paradoxurus_hermaphroditus	0.954229
Arctictis_binturong	0.954229
Prionodon_pardicolor	0.9669
Prionodon_linsang	0.9669
Neofelis_nebulosa	0.954229
Panthera_tigris	0.954229
Panthera_onca	0.954229
Panthera_uncia	0.954229
Panthera_pardus	0.954229
Panthera_leo	0.954229
Lynx_rufus	0.954229
Lynx_lynx	0.954229
Lynx_canadensis	0.954229
Acinonyx_jubatus	0.954229
Puma_concolor	0.954229
Felis_catus	0.954229
Felis_silvestris	0.954229
Leopardus_pardalis	0.954229
Leopardus_wiedii	0.954229
Leopardus_tigrinus	0.954229
Prionailurus_bengalensis	0.954229
Leptailurus_serval	0.954229
Caracal_caracal	0.954229
Equus_africanus	0.850235
Equus_grevyi	0.875293
Equus_quagga	0.875293
Equus_zebra	0.875293
Equus_hemionus	0.875293
Equus_caballus	0.837353
Equus_ferus	0.875293
Tapirus_indicus	0.850235
Tapirus_terrestris	0.850235
Tapirus_bairdii	0.850235
Rhinoceros_unicornis	0.764708
Rhinoceros_sondaicus	0.764708
Dicerorhinus_sumatrensis	0.764708
Diceros_bicornis	0.749896
Ceratotherium_simum	0.764708
Vicugna_pacos	0.9669
Vicugna_vicugna	0.9669
Lama_glama	0.9669
Camelus_dromedarius	0.965482
Camelus_ferus	0.9669
Tayassu_pecari	0.927725
Pecari_tajacu	0.908371
Sus_scrofa	0.942191
Sus_barbatus	0.89371
Potamochoerus_porcus	0.908371
Phacochoerus_africanus	0.942191
Phacochoerus_aethiopicus	0.922735
Hylochoerus_meinertzhageni	0.908371
Babyrousa_babyrussa	0.942191
Hippopotamus_amphibius	0.864521
Choeropsis_liberiensis	0.864521
Indopacetus_pacificus	0.915884
Kogia_sima	0.970404
Kogia_breviceps	0.977701
Physeter_macrocephalus	0.983084
Platanista_gangetica	0.990699
Pontoporia_blainvillei	0.978308
Inia_geoffrensis	0.856681
Inia_araguaiaensis	0.886706
Lipotes_vexillifer	0.985158
Delphinapterus_leucas	0.983794
Mesoplodon_bowdoini	0.987439
Monodon_monoceros	0.983794
Neophocaena_phocaenoides	0.971413
Phocoenoides_dalli	0.895709
Phocoena_phocoena	0.96199
Phocoena_spinipinnis	0.953744
Phocoena_dioptrica	0.958716
Lagenorhynchus_acutus	0.93115
Lagenorhynchus_albirostris	0.904608
Orcinus_orca	0.977701
Orcaella_brevirostris	0.96199
Grampus_griseus	0.944142
Pseudorca_crassidens	0.987439
Peponocephala_electra	0.953744
Globicephala_melas	0.964715
Globicephala_macrorhynchus	0.976097
Feresa_attenuata	0.950735
Steno_bredanensis	0.95773
Sotalia_guianensis	0.974048
Sotalia_fluviatilis	0.974048
Tursiops_truncatus	0.96199
Stenella_attenuata	0.918549
Lagenodelphis_hosei	0.902244
Stenella_longirostris	0.93115
Sousa_chinensis	0.977701
Tursiops_aduncus	0.96199
Stenella_frontalis	0.949417
Stenella_coeruleoalba	0.93115
Stenella_clymene	0.941681
Delphinus_delphis	0.916516
Delphinus_capensis	0.92415
Lagenorhynchus_obscurus	0.905805
Lagenorhynchus_obliquidens	0.909694
Lagenorhynchus_cruciger	0.905805
Lagenorhynchus_australis	0.96199
Cephalorhynchus_hectori	0.942508
Cephalorhynchus_heavisidii	0.929167
Cephalorhynchus_eutropia	0.95001
Cephalorhynchus_commersonii	0.956726
Berardius_bairdii	0.971413
Berardius_arnuxii	0.978541
Mesoplodon_bidens	0.987439
Ziphius_cavirostris	0.987439
Mesoplodon_stejnegeri	0.983794
Hyperoodon_planifrons	0.991093
Hyperoodon_ampullatus	0.991093
Mesoplodon_hectori	0.984408
Mesoplodon_carlhubbsi	0.984408
Mesoplodon_layardii	0.987439
Mesoplodon_mirus	0.987439
Mesoplodon_europaeus	0.987439
Mesoplodon_densirostris	0.987439
Mesoplodon_grayi	0.984408
Tasmacetus_shepherdi	0.987439
Eubalaena_glacialis	0.963233
Eubalaena_japonica	0.964715
Balaenoptera_physalus	0.953744
Balaenoptera_musculus	0.949417
Balaenoptera_omurai	0.969617
Balaenoptera_borealis	0.96199
Balaenoptera_edeni	0.96551
Mesoplodon_perrini	0.984408
Balaenoptera_bonaerensis	0.976097
Mesoplodon_peruvianus	0.987439
Lissodelphis_peronii	0.833842
Lissodelphis_borealis	0.833653
Balaena_mysticetus	0.978541
Caperea_marginata	0.792884
Balaenoptera_acutorostrata	0.976097
Mesoplodon_ginkgodens	0.984408
Megaptera_novaeangliae	0.964715
Eschrichtius_robustus	0.963233
Moschiola_meminna	0.942191
Moschiola_indica	0.942191
Tragulus_javanicus	0.942191
Tragulus_kanchil	0.942191
Tragulus_napu	0.942191
Okapia_johnstoni	0.908371
Giraffa_camelopardalis	0.908371
Antilocapra_americana	0.942191
Muntiacus_muntjak	0.942191
Dama_dama	0.942191
Elaphurus_davidianus	0.942191
Rusa_unicolor	0.942191
Cervus_elaphus	0.942191
Axis_calamianensis	0.942191
Axis_axis	0.942191
Rangifer_tarandus	0.908371
Odocoileus_virginianus	0.942191
Odocoileus_hemionus	0.942191
Mazama_gouazoubira	0.942191
Blastocerus_dichotomus	0.954961
Pudu_puda	0.942191
Hydropotes_inermis	0.954961
Capreolus_capreolus	0.942191
Alces_alces	0.942191
Moschus_moschiferus	0.908371
Moschus_berezovskii	0.942191
Boselaphus_tragocamelus	0.942191
Tetracerus_quadricornis	0.942191
Tragelaphus_imberbis	0.942191
Tragelaphus_angasii	0.942191
Tragelaphus_scriptus	0.942191
Tragelaphus_eurycerus	0.942191
Tragelaphus_spekii	0.942191
Tragelaphus_buxtoni	0.942191
Tragelaphus_strepsiceros	0.942191
Syncerus_caffer	0.942191
Bubalus_mindorensis	0.942191
Bubalus_depressicornis	0.954229
Bubalus_arnee	0.942191
Bos_gaurus	0.942191
Bos_taurus	0.942191
Bos_indicus	0.942191
Bison_bonasus	0.908371
Bos_mutus	0.908371
Bos_grunniens	0.908371
Bison_bison	0.908371
Nesotragus_moschatus	0.942191
Aepyceros_melampus	0.942191
Pelea_capreolus	0.942191
Redunca_fulvorufula	0.942191
Redunca_redunca	0.942191
Redunca_arundinum	0.942191
Kobus_megaceros	0.942191
Kobus_leche	0.942191
Kobus_vardonii	0.942191
Kobus_kob	0.942191
Kobus_ellipsiprymnus	0.942191
Ourebia_ourebi	0.942191
Raphicerus_melanotis	0.942191
Raphicerus_sharpei	0.942191
Raphicerus_campestris	0.942191
Madoqua_kirkii	0.942191
Madoqua_guentheri	0.942191
Saiga_tatarica	0.9669
Nanger_granti	0.942191
Eudorcas_rufifrons	0.942191
Gazella_dorcas	0.942191
Gazella_gazella	0.942191
Gazella_spekei	0.942191
Antilope_cervicapra	0.942191
Litocranius_walleri	0.942191
Antidorcas_marsupialis	0.942191
Neotragus_pygmaeus	0.931356
Oreotragus_oreotragus	0.942191
Philantomba_monticola	0.908371
Sylvicapra_grimmia	0.908371
Cephalophus_silvicultor	0.908371
Cephalophus_dorsalis	0.908371
Cephalophus_leucogaster	0.908371
Cephalophus_nigrifrons	0.908371
Cephalophus_natalensis	0.908371
Cephalophus_weynsi	0.908371
Ovibos_moschatus	0.942191
Capricornis_crispus	0.942191
Ovis_canadensis	0.942191
Ovis_orientalis	0.942191
Ovis_aries	0.954229
Ovis_ammon	0.942191
Capra_ibex	0.942191
Capra_hircus	0.942191
Pseudois_nayaur	0.942191
Myotragus_balearicus	0.954961
Oreamnos_americanus	0.942191
Rupicapra_rupicapra	0.942191
Ammotragus_lervia	0.942191
Connochaetes_taurinus	0.942191
Connochaetes_gnou	0.927725
Damaliscus_pygargus	0.942191
Damaliscus_lunatus	0.942191
Beatragus_hunteri	0.942191
Alcelaphus_buselaphus	0.942191
Hippotragus_niger	0.942191
Hippotragus_equinus	0.927725
Oryx_dammah	0.942191
Oryx_leucoryx	0.942191
Oryx_gazella	0.942191
Oryx_beisa	0.942191
Rhinopoma_hardwickii	0.910569
Rhinopoma_microphyllum	0.954961
Lavia_frons	0.910569
Megaderma_spasma	0.89371
Rhinolophus_hipposideros	0.954961
Asellia_tridens	0.977426
Hipposideros_caffer	0.954961
Hipposideros_diadema	0.977426
Cynopterus_titthaecheilus	0.908371
Cynopterus_brachyotis	0.879821
Epomops_franqueti	0.922735
Hypsignathus_monstrosus	0.824731
Rousettus_aegyptiacus	0.922735
Eidolon_helvum	0.856681
Pteropus_giganteus	0.922735
Pteropus_rufus	0.935307
Pteropus_vampyrus	0.922735
Macroglossus_minimus	0.89371
Myzopoda_aurita	0.922735
Mystacina_tuberculata	0.922735
Thyroptera_discifera	0.935307
Noctilio_leporinus	0.965482
Pteronotus_parnellii	0.922735
Mormoops_megalophylla	0.942191
Micronycteris_microtis	0.922735
Anoura_caudifer	0.89371
Glossophaga_soricina	0.935307
Glossophaga_morenoi	0.935307
Phylloderma_stenops	0.922735
Phyllostomus_discolor	0.954961
Lonchorhina_inusitata	0.954961
Chrotopterus_auritus	0.954961
Vampyrum_spectrum	0.954961
Lonchophylla_inexpectata	0.910569
Carollia_perspicillata	0.935307
Artibeus_jamaicensis	0.922735
Artibeus_planirostris	0.910569
Pygoderma_bilabiatum	0.935307
Vampyressa_pusilla	0.89371
Sturnira_erythromos	0.910569
Sturnira_aratathomasi	0.935307
Rhinophylla_pumilio	0.92551
Lonchorhina_orinocensis	0.954961
Lonchorhina_fernandezi	0.954961
Lonchorhina_marinkellei	0.954961
Lonchorhina_aurita	0.954961
Diphylla_ecaudata	0.935307
Desmodus_rotundus	0.935307
Diaemus_youngi	0.965482
Macrotus_waterhousii	0.954961
Macrotus_californicus	0.954961
Nyctinomops_macrotis	0.942191
Molossus_molossus	0.965482
Promops_nasutus	0.942191
Molossops_temminckii	0.942191
Cynomops_planirostris	0.922735
Eumops_perotis	0.942191
Tadarida_brasiliensis	0.942191
Molossus_currentium	0.965482
Myotis_daubentonii	0.950595
Myotis_keaysi	0.950595
Myotis_velifer	0.950595
Myotis_chiloensis	0.950595
Myotis_lucifugus	0.92551
Myotis_evotis	0.950595
Eptesicus_nilssonii	0.950595
Eptesicus_serotinus	0.950595
Histiotus_montanus	0.950595
Histiotus_magellanicus	0.910569
Eptesicus_diminutus	0.950595
Lasionycteris_noctivagans	0.950595
Pipistrellus_pipistrellus	0.910569
Nyctalus_noctula	0.950595
Vespertilio_murinus	0.9669
Chalinolobus_tuberculatus	0.950595
Neoromicia_nana	0.950595
Lasiurus_cinereus	0.950595
Lasiurus_ega	0.950595
Antrozous_pallidus	0.950595
Otonycteris_hemprichii	0.965482
Plecotus_auritus	0.950595
Euderma_maculatum	0.950595
Barbastella_barbastellus	0.950595
Miniopterus_schreibersii	0.935307
Nycteris_javanica	0.935307
Nycteris_thebaica	0.92551
Saccopteryx_bilineata	0.954961
Peropteryx_leucoptera	0.942191
Balantiopteryx_plicata	0.9669
Galeopterus_variegatus	0.942191
Cynocephalus_volans	0.942191
Nycticebus_coucang	0.91791
Loris_tardigradus	0.931191
Otolemur_garnettii	0.927725
Otolemur_crassicaudatus	0.954229
Galago_senegalensis	0.942191
Euoticus_elegantulus	0.942191
Perodicticus_potto	0.902089
Arctocebus_calabarensis	0.943584
Daubentonia_madagascariensis	0.942191
Indri_indri	0.977701
Propithecus_diadema	0.972794
Propithecus_verreauxi	0.972794
Propithecus_coquereli	0.972794
Avahi_laniger	0.977701
Varecia_variegata	0.9669
Lemur_catta	0.9669
Hapalemur_griseus	0.9669
Eulemur_macaco	0.9669
Eulemur_rubriventer	0.9669
Eulemur_mongoz	0.9669
Eulemur_collaris	0.9669
Eulemur_fulvus	0.9669
Eulemur_sanfordi	0.9669
Eulemur_albifrons	0.9669
Lepilemur_mustelinus	0.977701
Cheirogaleus_medius	0.927725
Microcebus_murinus	0.954229
Microcebus_rufus	0.954229
Tarsius_syrichta	0.942191
Pithecia_irrorata	0.942191
Pithecia_monachus	0.942191
Pithecia_pithecia	0.942191
Cacajao_melanocephalus	0.942191
Callicebus_moloch	0.942191
Leontocebus_nigricollis	0.9669
Saguinus_oedipus	0.9669
Leontopithecus_rosalia	0.9669
Mico_humeralifer	0.9669
Callithrix_jacchus	0.942191
Cebuella_pygmaea	0.942191
Saimiri_sciureus	0.954229
Cebus_olivaceus	0.908371
Cebus_albifrons	0.927725
Cebus_capucinus	0.942191
Aotus_azarae	0.953611
Aotus_nancymaae	0.953611
Alouatta_seniculus	0.908371
Alouatta_caraya	0.908371
Alouatta_palliata	0.908371
Alouatta_pigra	0.908371
Lagothrix_lagotricha	0.879821
Brachyteles_hypoxanthus	0.922735
Brachyteles_arachnoides	0.879821
Ateles_geoffroyi	0.879821
Ateles_fusciceps	0.879821
Ateles_paniscus	0.89371
Ateles_chamek	0.879821
Ateles_belzebuth	0.879821
Symphalangus_syndactylus	0.922735
Hylobates_pileatus	0.935307
Hylobates_lar	0.922735
Hylobates_muelleri	0.922735
Hylobates_moloch	0.922735
Hylobates_klossii	0.922735
Hylobates_agilis	0.922735
Nomascus_concolor	0.922735
Nomascus_gabriellae	0.908371
Nomascus_leucogenys	0.908371
Hoolock_hoolock	0.922735
Pongo_pygmaeus	0.910569
Pongo_abelii	0.910569
Pan_troglodytes	0.89371
Pan_paniscus	0.89371
Homo_sapiens	0.935307
Gorilla_gorilla	0.89371
Gorilla_beringei	0.856681
Semnopithecus_schistaceus	0.9669
Trachypithecus_cristatus	0.9669
Trachypithecus_phayrei	0.9669
Semnopithecus_entellus	0.9669
Presbytis_rubicunda	0.9669
Presbytis_melalophos	0.9669
Rhinopithecus_bieti	0.9669
Rhinopithecus_roxellana	0.9669
Nasalis_larvatus	0.9669
Colobus_guereza	0.9669
Colobus_vellerosus	0.9669
Macaca_leonina	0.9669
Macaca_sinica	0.9669
Macaca_silenus	0.9669
Macaca_nemestrina	0.9669
Macaca_maura	0.9669
Macaca_radiata	0.9669
Macaca_fascicularis	0.9669
Macaca_arctoides	0.9669
Macaca_nigra	0.9669
Macaca_fuscata	0.9669
Macaca_mulatta	0.9669
Macaca_sylvanus	0.9669
Theropithecus_gelada	0.942191
Papio_cynocephalus	0.942191
Papio_papio	0.942191
Papio_hamadryas	0.942191
Papio_anubis	0.942191
Lophocebus_aterrimus	0.942191
Lophocebus_albigena	0.942191
Cercocebus_atys	0.9669
Mandrillus_sphinx	0.9669
Mandrillus_leucophaeus	0.9669
Cercopithecus_mitis	0.9669
Cercopithecus_ascanius	0.9669
Erythrocebus_patas	0.9669
Chlorocebus_pygerythrus	0.9669
Chlorocebus_aethiops	0.9669
Chlorocebus_cynosuros	0.9669
Chlorocebus_sabaeus	0.9669
Miopithecus_talapoin	0.942191
Ptilocercus_lowii	0.908371
Tupaia_glis	0.942191
Tupaia_nicobarica	0.942191
Urogale_everetti	0.942191
Tupaia_tana	0.942191
Dendrogale_melanura	0.942191
Anathana_ellioti	0.942191
Sylvilagus_audubonii	0.9669
Oryctolagus_cuniculus	0.9669
Pentalagus_furnessi	0.9669
Lepus_californicus	0.9669
Lepus_alleni	0.9669
Lepus_townsendii	0.9669
Lepus_timidus	0.9669
Lepus_europaeus	0.9669
Lepus_americanus	0.9669
Nesolagus_timminsi	0.9669
Nesolagus_netscheri	0.9669
Ochotona_hyperborea	0.81987
Ochotona_princeps	0.865219
Muscardinus_avellanarius	0.942191
Aplodontia_rufa	0.942191
Ratufa_indica	0.942191
Callosciurus_erythraeus	0.9669
Tamias_striatus	0.9669
Tamias_minimus	0.9669
Spermophilus_dauricus	0.9669
Ictidomys_tridecemlineatus	0.963387
Cynomys_ludovicianus	0.9669
Marmota_monax	0.9669
Marmota_caligata	0.9669
Marmota_marmota	0.9669
Marmota_sibirica	0.9669
Sciurus_anomalus	0.9669
Sciurus_niger	0.9669
Sciurus_carolinensis	0.9669
Sciurus_griseus	0.9669
Microsciurus_mimulus	0.9669
Microsciurus_alfari	0.9669
Microsciurus_flaviventer	0.9669
Sciurus_vulgaris	0.9669
Tamiasciurus_hudsonicus	0.9669
Glaucomys_volans	0.9669
Petaurista_leucogenys	0.9669
Petaurista_philippensis	0.9669
Petaurista_alborufus	0.9669
Petaurista_grandis	0.9669
Laonastes_aenigmamus	0.983794
Atherurus_macrourus	0.864521
Hystrix_javanica	0.908371
Hystrix_cristata	0.908371
Thryonomys_swinderianus	0.922735
Heterocephalus_glaber	0.983084
Heliophobius_argenteocinereus	0.954961
Cryptomys_hottentotus	0.942191
Georychus_capensis	0.9669
Bathyergus_suillus	0.954229
Cuniculus_paca	0.942191
Myoprocta_acouchy	0.942191
Dasyprocta_leporina	0.9669
Dasyprocta_azarae	0.954229
Hydrochoerus_hydrochaeris	0.942191
Dolichotis_patagonum	0.9669
Cavia_porcellus	0.942191
Cavia_aperea	0.942191
Erethizon_dorsatum	0.927725
Coendou_prehensilis	0.915545
Lagostomus_maximus	0.9669
Chinchilla_lanigera	0.942191
Chinchilla_chinchilla	0.942191
Phyllomys_sulinus	0.927725
Myocastor_coypus	0.942191
Capromys_pilorides	0.91791
Ctenomys_boliviensis	0.9669
Ctenomys_talarum	0.9669
Octodon_degus	0.9669
Spalacopus_cyanus	0.954229
Dipus_sagitta	0.9669
Jaculus_orientalis	0.9669
Jaculus_jaculus	0.9669
Stylodipus_telum	0.9669
Allactaga_euphratica	0.9669
Allactaga_major	0.942191
Zapus_princeps	0.942191
Sicista_concolor	0.942191
Spalax_leucodon	0.942191
Rhizomys_pruinosus	0.892687
Dicrostonyx_groenlandicus	0.942191
Ondatra_zibethicus	0.942191
Lemmus_sibiricus	0.942191
Synaptomys_cooperi	0.942191
Ellobius_talpinus	0.942191
Microtus_arvalis	0.942191
Microtus_pennsylvanicus	0.942191
Microtus_ochrogaster	0.942191
Microtus_chrotorrhinus	0.942191
Microtus_oeconomus	0.942191
Myodes_gapperi	0.942191
Mesocricetus_auratus	0.942191
Tscherskia_triton	0.942191
Cricetus_cricetus	0.942191
Cricetulus_migratorius	0.942191
Cricetulus_longicaudatus	0.942191
Cricetulus_barabensis	0.942191
Phodopus_sungorus	0.942191
Neotoma_fuscipes	0.942191
Neotoma_lepida	0.942191
Neotoma_floridana	0.942191
Neotoma_albigula	0.942191
Neotoma_mexicana	0.942191
Neotoma_cinerea	0.942191
Hodomys_alleni	0.942191
Nelsonia_neotomodon	0.942191
Xenomys_nelsoni	0.927725
Ochrotomys_nuttalli	0.942191
Reithrodontomys_creper	0.942191
Reithrodontomys_mexicanus	0.942191
Reithrodontomys_fulvescens	0.942191
Reithrodontomys_sumichrasti	0.942191
Reithrodontomys_megalotis	0.942191
Reithrodontomys_humulis	0.942191
Reithrodontomys_montanus	0.942191
Isthmomys_pirrensis	0.942191
Isthmomys_flavidus	0.942191
Onychomys_torridus	0.942191
Onychomys_leucogaster	0.942191
Peromyscus_maniculatus	0.942191
Peromyscus_leucopus	0.942191
Megadontomys_thomasi	0.942191
Peromyscus_yucatanicus	0.942191
Peromyscus_guatemalensis	0.942191
Peromyscus_mexicanus	0.942191
Peromyscus_megalops	0.942191
Peromyscus_melanophrys	0.942191
Habromys_lepturus	0.954229
Habromys_lophurus	0.954229
Peromyscus_crinitus	0.942191
Peromyscus_ochraventer	0.942191
Peromyscus_truei	0.942191
Peromyscus_difficilis	0.942191
Peromyscus_attwateri	0.942191
Peromyscus_furvus	0.942191
Peromyscus_spicilegus	0.942191
Peromyscus_boylii	0.942191
Podomys_floridanus	0.942191
Neotomodon_alstoni	0.942191
Peromyscus_californicus	0.942191
Peromyscus_eremicus	0.942191
Osgoodomys_banderanus	0.942191
Scotinomys_xerampelinus	0.942191
Scotinomys_teguina	0.942191
Baiomys_taylori	0.942191
Baiomys_musculus	0.942191
Tylomys_panamensis	0.927725
Tylomys_mirae	0.927725
Tylomys_watsoni	0.927725
Tylomys_fulviventer	0.927725
Tylomys_nudicaudus	0.927725
Ototylomys_phyllotis	0.915545
Nyctomys_sumichrasti	0.942191
Chibchanomys_trichotis	0.908371
Reithrodon_auritus	0.9669
Rheomys_underwoodi	0.942191
Rheomys_thomasi	0.942191
Rheomys_mexicanus	0.942191
Rheomys_raptor	0.942191
Ichthyomys_pittieri	0.942191
Ichthyomys_hydrobates	0.942191
Ichthyomys_tweedii	0.942191
Neusticomys_venezuelae	0.908371
Neusticomys_ferreirai	0.942191
Neusticomys_monticolus	0.942191
Anotomys_leander	0.927725
Chinchillula_sahamae	0.942191
Sigmodon_leucotis	0.9669
Sigmodon_fulviventer	0.9669
Sigmodon_alleni	0.9669
Sigmodon_ochrognathus	0.9669
Sigmodon_hispidus	0.9669
Rhipidomys_macconnelli	0.942191
Rhipidomys_nitela	0.9669
Rhipidomys_mastacalis	0.9669
Rhipidomys_fulviventer	0.942191
Rhipidomys_venustus	0.942191
Rhipidomys_couesi	0.9669
Rhipidomys_venezuelae	0.9669
Rhipidomys_latimanus	0.942191
Rhipidomys_austrinus	0.942191
Aepeomys_lugens	0.942191
Thomasomys_gracilis	0.942191
Thomasomys_cinereus	0.942191
Thomasomys_rhoadsi	0.942191
Thomasomys_baeops	0.954229
Thomasomys_aureus	0.942191
Thomasomys_pyrrhonotus	0.954229
Thomasomys_daphne	0.942191
Thomasomys_oreas	0.942191
Thomasomys_hylophilus	0.942191
Thomasomys_paramorum	0.942191
Chilomys_instans	0.942191
Akodon_bogotensis	0.9669
Blarinomys_breviceps	0.942191
Scapteromys_tumidus	0.942191
Scapteromys_meridionalis	0.942191
Scapteromys_aquaticus	0.942191
Kunsia_tomentosus	0.954961
Thalpomys_lasiotis	0.942191
Necromys_amoenus	0.942191
Necromys_urichi	0.942191
Necromys_lasiurus	0.9669
Necromys_temchuki	0.942191
Necromys_obscurus	0.942191
Necromys_lactens	0.942191
Akodon_mimus	0.942191
Akodon_azarae	0.942191
Akodon_boliviensis	0.942191
Akodon_subfuscus	0.942191
Akodon_lutescens	0.942191
Akodon_cursor	0.942191
Akodon_simulator	0.942191
Akodon_albiventer	0.942191
Akodon_mollis	0.942191
Akodon_torques	0.942191
Akodon_aerosus	0.942191
Deltamys_kempi	0.942191
Thaptomys_nigrita	0.942191
Oxymycterus_delator	0.942191
Oxymycterus_paramensis	0.942191
Oxymycterus_rufus	0.942191
Oxymycterus_inca	0.942191
Zygodontomys_brevicauda	0.9669
Oecomys_concolor	0.9669
Oecomys_roberti	0.9669
Oecomys_bicolor	0.9669
Oecomys_superans	0.9669
Oecomys_trinitatis	0.9669
Oecomys_mamorae	0.9669
Oecomys_paricola	0.9669
Transandinomys_talamancae	0.9669
Transandinomys_bolivaris	0.9669
Euryoryzomys_nitidus	0.9669
Euryoryzomys_russatus	0.9669
Euryoryzomys_legatus	0.9669
Nephelomys_albigularis	0.9669
Nephelomys_keaysi	0.9669
Hylaeamys_megacephalus	0.9669
Handleyomys_alfaroi	0.9669
Handleyomys_melanotis	0.9669
Handleyomys_chapmani	0.9669
Neacomys_guianae	0.9669
Neacomys_spinosus	0.9669
Neacomys_tenuipes	0.9669
Microryzomys_minutus	0.9669
Microryzomys_altissimus	0.9669
Oligoryzomys_microtis	0.9669
Oligoryzomys_nigripes	0.9669
Oligoryzomys_destructor	0.9669
Oligoryzomys_fulvescens	0.9669
Oligoryzomys_eliurus	0.9669
Oligoryzomys_delticola	0.9669
Oligoryzomys_chacoensis	0.9669
Oligoryzomys_andinus	0.9669
Oligoryzomys_magellanicus	0.9669
Oligoryzomys_longicaudatus	0.9669
Oligoryzomys_flavescens	0.9669
Eremoryzomys_polius	0.9669
Cerradomys_subflavus	0.9669
Sooretamys_angouya	0.9669
Holochilus_brasiliensis	0.9669
Holochilus_chacarius	0.9669
Pseudoryzomys_simplex	0.9669
Lundomys_molitor	0.9669
Nectomys_squamipes	0.9669
Oryzomys_couesi	0.9669
Oryzomys_palustris	0.9669
Sigmodontomys_alfari	0.9669
Melanomys_caliginosus	0.9669
Nesoryzomys_indefessus	0.942191
Irenomys_tarsalis	0.942191
Euneomys_petersoni	0.942191
Euneomys_chinchilloides	0.942191
Andinomys_edax	0.942191
Punomys_kofordi	0.942191
Delomys_sublineatus	0.942191
Delomys_dorsalis	0.942191
Calomys_lepidus	0.942191
Calomys_sorellus	0.942191
Calomys_musculinus	0.942191
Calomys_laucha	0.942191
Calomys_tener	0.9669
Calomys_boliviae	0.9669
Calomys_callosus	0.9669
Calomys_venustus	0.9669
Calomys_hummelincki	0.9669
Eligmodontia_morgani	0.942191
Eligmodontia_puerulus	0.942191
Eligmodontia_moreni	0.9669
Eligmodontia_hirtipes	0.9669
Eligmodontia_bolsonensis	0.9669
Graomys_griseoflavus	0.9669
Graomys_domorum	0.9669
Andalgalomys_pearsoni	0.942191
Andalgalomys_olrogi	0.9669
Salinomys_delicatus	0.9669
Phyllotis_wolffsohni	0.942191
Tapecomys_primus	0.942191
Auliscomys_sublimis	0.942191
Auliscomys_pictus	0.942191
Auliscomys_boliviensis	0.942191
Galenomys_garleppi	0.942191
Loxodontomys_micropus	0.942191
Phyllotis_osilae	0.942191
Phyllotis_alisosiensis	0.942191
Phyllotis_anitae	0.942191
Phyllotis_caprinus	0.942191
Phyllotis_xanthopygus	0.942191
Phyllotis_darwini	0.942191
Phyllotis_amicus	0.942191
Paralomys_gerbillus	0.942191
Phyllotis_haggardi	0.942191
Phyllotis_andium	0.942191
Calassomys_apicalis	0.9669
Akodon_neocenus	0.942191
Wiedomys_pyrrhorhinos	0.9669
Juliomys_pictipes	0.942191
Abrothrix_olivaceus	0.942191
Abrothrix_andinus	0.942191
Abrothrix_jelskii	0.942191
Abrothrix_illuteus	0.942191
Abrothrix_longipilis	0.942191
Abrothrix_sanborni	0.942191
Notiomys_edwardsii	0.942191
Geoxus_valdivianus	0.942191
Chelemys_macronyx	0.942191
Mystromys_albicaudatus	0.942191
Saccostomus_campestris	0.9669
Beamys_hindei	0.942191
Cricetomys_gambianus	0.942191
Brachytarsomys_albicauda	0.954229
Gymnuromys_roberti	0.954229
Eliurus_myoxinus	0.954229
Brachyuromys_ramirohitra	0.954229
Nesomys_rufus	0.954229
Nesomys_audeberti	0.954229
Macrotarsomys_bastardi	0.954229
Calomyscus_baluchi	0.942191
Lophiomys_imhausi	0.91791
Pachyuromys_duprasi	0.9669
Psammomys_obesus	0.9669
Meriones_shawi	0.9669
Meriones_unguiculatus	0.9669
Sekeetamys_calurus	0.9669
Ammodillus_imbellis	0.9669
Microdillus_peeli	0.9669
Gerbillus_cheesmani	0.9669
Taterillus_arenarius	0.9669
Gerbilliscus_nigricaudus	0.9669
Gerbillurus_setzeri	0.9669
Desmodillus_auricularis	0.9669
Tatera_indica	0.9669
Notomys_amplus	0.9669
Conilurus_albipes	0.954229
Hydromys_chrysogaster	0.943584
Mastomys_coucha	0.942191
Mus_musculus	0.9669
Rhabdomys_pumilio	0.9669
Micromys_minutus	0.942191
Maxomys_inflatus	0.942191
Rattus_rattus	0.942191
Rattus_fuscipes	0.942191
Rattus_norvegicus	0.942191
Pedetes_surdaster	0.9669
Pedetes_capensis	0.9669
Anomalurus_pelii	0.954853
Anomalurus_derbianus	0.954853
Anomalurus_beecrofti	0.939908
Anomalurus_pusillus	0.950129
Microdipodops_pallidus	0.9669
Dipodomys_spectabilis	0.9669
Dipodomys_ordii	0.9669
Dipodomys_heermanni	0.9669
Dipodomys_merriami	0.9669
Thomomys_bulbivorus	0.9669
Thomomys_umbrinus	0.9669
Thomomys_bottae	0.9669
Geomys_pinetis	0.9669
Geomys_bursarius	0.9669
Geomys_arenarius	0.942191
Cratogeomys_castanops	0.954961
Liomys_salvini	0.9669
Heteromys_anomalus	0.9669
Perognathus_fasciatus	0.9669
Castor_fiber	0.908371
Castor_canadensis	0.908371
Hydrodamalis_gigas	0.792884
Trichechus_manatus	0.717978
Trichechus_senegalensis	0.717978
Trichechus_inunguis	0.751407
Dugong_dugon	0.764708
Loxodonta_africana	0.749896
Elephas_maximus	0.81987
Procavia_capensis	0.872805
Heterohyrax_brucei	0.844514
Dendrohyrax_validus	0.850966
Dendrohyrax_dorsalis	0.884919
Dendrohyrax_arboreus	0.844514
Orycteropus_afer	0.964172
Rhynchocyon_cirnei	0.954229
Rhynchocyon_chrysopygus	0.964172
Rhynchocyon_petersi	0.964172
Elephantulus_myurus	0.954229
Elephantulus_edwardii	0.927725
Macroscelides_proboscideus	0.927725
Petrodromus_tetradactylus	0.954229
Elephantulus_rufescens	0.954229
Elephantulus_brachyrhynchus	0.927725
Elephantulus_intufi	0.954229
Elephantulus_rupestris	0.927725
Potamogale_velox	0.865219
Limnogale_mergulus	0.865219
Microgale_talazaci	0.91791
Microgale_longicaudata	0.887673
Microgale_cowani	0.865219
Oryzorictes_tetradactylus	0.865219
Tenrec_ecaudatus	0.837353
Hemicentetes_semispinosus	0.834439
Setifer_setosus	0.91791
Echinops_telfairi	0.848211
Eremitalpa_granti	0.739951
Amblysomus_hottentotus	0.764708
Calcochloris_obtusirostris	0.764708
Chrysospalax_trevelyani	0.764708
Chrysochloris_asiatica	0.764708
Dasypus_hybridus	0.972784
Dasypus_novemcinctus	0.963387
Dasypus_kappleri	0.972784
Dasypus_septemcinctus	0.937785
Zaedyus_pichiy	0.886706
Euphractus_sexcinctus	0.886706
Chaetophractus_vellerosus	0.886706
Chaetophractus_villosus	0.886706
Chlamyphorus_truncatus	0.886706
Tolypeutes_matacus	0.886706
Priodontes_maximus	0.92551
Cabassous_unicinctus	0.872734
Tamandua_tetradactyla	0.792884
Tamandua_mexicana	0.792884
Myrmecophaga_tridactyla	0.75496
Cyclopes_didactylus	0.769109
Choloepus_hoffmanni	0.6862
Choloepus_didactylus	0.740007
Bradypus_tridactylus	0.883337
Bradypus_variegatus	0.883337
Rhyncholestes_raphanurus	0.942191
Caenolestes_fuliginosus	0.942191
Glironia_venusta	0.942191
Monodelphis_domestica	0.927725
Gracilinanus_microtarsus	0.922735
Metachirus_nudicaudatus	0.942191
Didelphis_virginiana	0.942191
Didelphis_marsupialis	0.942191
Didelphis_albiventris	0.942191
Chironectes_minimus	0.942191
Caluromys_philander	0.942191
Dromiciops_gliroides	0.922735
Notoryctes_typhlops	0.837353
Notoryctes_caurinus	0.89371
Macrotis_lagotis	0.942191
Isoodon_macrourus	0.942191
Isoodon_obesulus	0.942191
Perameles_gunnii	0.942191
Perameles_nasuta	0.942191
Sarcophilus_harrisii	0.942191
Dasyurus_maculatus	0.942191
Dasyurus_viverrinus	0.942191
Dasyuroides_byrnei	0.942191
Dasycercus_cristicauda	0.942191
Antechinus_flavipes	0.942191
Thylacinus_cynocephalus	0.942191
Myrmecobius_fasciatus	0.942191
Phascolarctos_cinereus	0.983084
Vombatus_ursinus	0.864521
Lasiorhinus_latifrons	0.864521
Cercartetus_concinnus	0.942191
Trichosurus_vulpecula	0.942191
Spilocuscus_maculatus	0.942191
Phalanger_sericeus	0.942191
Phalanger_orientalis	0.942191
Hypsiprymnodon_moschatus	0.942191
Thylogale_billardierii	0.942191
Petrogale_lateralis	0.942191
Petrogale_penicillata	0.942191
Dendrolagus_goodfellowi	0.942191
Dendrolagus_matschiei	0.942191
Dendrolagus_bennettianus	0.942191
Dendrolagus_lumholtzi	0.942191
Macropus_fuliginosus	0.942191
Macropus_giganteus	0.942191
Macropus_antilopinus	0.942191
Macropus_robustus	0.942191
Macropus_rufus	0.942191
Macropus_rufogriseus	0.942191
Macropus_eugenii	0.942191
Macropus_agilis	0.942191
Macropus_parryi	0.942191
Macropus_parma	0.942191
Macropus_irma	0.942191
Dendrolagus_ursinus	0.942191
Potorous_longipes	0.942191
Potorous_tridactylus	0.942191
Bettongia_penicillata	0.942191
Bettongia_gaimardi	0.942191
Aepyprymnus_rufescens	0.942191
Pseudocheirus_peregrinus	0.942191
Petauroides_volans	0.9669
Petaurus_australis	0.942191
Petaurus_norfolcensis	0.942191
Petaurus_breviceps	0.942191

## Sheet: logit_TL_ratio
	logit_TL_ratio
Zaglossus_bruijnii	-3.11482
Tachyglossus_aculeatus	-2.87639
Ornithorhynchus_anatinus	-2.37627
Solenodon_paradoxus	-3.17805
Solenodon_cubanus	-3.24519
Galemys_pyrenaicus	-3.54715
Scapanus_latimanus	-3.54715
Scalopus_aquaticus	-3.54715
Talpa_europaea	-3.81007
Euroscaptor_mizura	-3.81007
Euroscaptor_micrura	-3.62331
Mogera_tokudae	-3.81007
Mogera_imaizumii	-3.54715
Mogera_wogura	-3.54715
Euroscaptor_subanura	-3.81007
Condylura_cristata	-3.81007
Hylomys_suillus	-3.73426
Echinosorex_gymnura	-3.66356
Erinaceus_europaeus	-3.66356
Paraechinus_micropus	-3.54715
Hemiechinus_auritus	-3.54715
Atelerix_algirus	-3.4095
Scutisorex_somereni	-4.42623
Suncus_madagascariensis	-3.4761
Crocidura_crenata	-3.81007
Crocidura_canariensis	-3.54715
Sorex_araneus	-3.73426
Sorex_minutus	-3.73426
Cryptotis_parva	-3.81007
Blarina_hylophaga	-3.96739
Notiosorex_crawfordi	-3.81007
Smutsia_gigantea	-3.54715
Phataginus_tricuspis	-3.73426
Manis_pentadactyla	-3.59731
Urocyon_cinereoargenteus	-3.96739
Vulpes_lagopus	-3.96739
Vulpes_zerda	-3.96739
Vulpes_vulpes	-3.96739
Otocyon_megalotis	-3.96739
Nyctereutes_procyonoides	-3.96739
Lycaon_pictus	-3.96739
Chrysocyon_brachyurus	-3.96739
Canis_mesomelas	-3.96739
Canis_simensis	-3.96739
Canis_latrans	-3.96739
Canis_aureus	-3.96739
Canis_lupus	-3.96739
Cuon_alpinus	-3.96739
Canis_adustus	-3.96739
Pseudalopex_gymnocercus	-3.96739
Speothos_venaticus	-3.96739
Cerdocyon_thous	-3.96739
Neomonachus_tropicalis	-3.4761
Monachus_monachus	-3.4761
Mirounga_leonina	-3.4761
Mirounga_angustirostris	-3.4761
Lobodon_carcinophaga	-3.4761
Leptonychotes_weddellii	-3.4761
Ommatophoca_rossii	-3.4761
Hydrurga_leptonyx	-3.73426
Erignathus_barbatus	-3.4761
Pagophilus_groenlandicus	-3.4761
Phoca_vitulina	-3.4761
Pusa_hispida	-3.4761
Halichoerus_grypus	-3.4761
Cystophora_cristata	-3.4761
Odobenus_rosmarus	-3.4761
Callorhinus_ursinus	-3.4761
Zalophus_californianus	-3.4761
Zalophus_japonicus	-3.4761
Eumetopias_jubatus	-3.4761
Arctocephalus_pusillus	-3.4761
Neophoca_cinerea	-3.4761
Otaria_bryonia	-3.4761
Arctocephalus_tropicalis	-3.4761
Arctocephalus_forsteri	-3.4761
Arctocephalus_australis	-3.4761
Mydaus_javanensis	-3.73426
Spilogale_gracilis	-3.89182
Mephitis_mephitis	-3.59731
Conepatus_humboldtii	-3.4095
Conepatus_chinga	-3.4095
Potos_flavus	-3.73426
Procyon_lotor	-3.73426
Procyon_cancrivorus	-3.73426
Bassariscus_astutus	-3.96739
Nasua_nasua	-3.73426
Nasua_narica	-3.4761
Bassaricyon_alleni	-3.96739
Taxidea_taxus	-3.73426
Meles_meles	-3.4761
Meles_anakuma	-3.4761
Arctonyx_collaris	-3.17805
Mellivora_capensis	-3.24519
Gulo_gulo	-3.4761
Martes_flavigula	-3.73426
Martes_foina	-3.73426
Martes_zibellina	-3.73426
Martes_martes	-3.73426
Martes_americana	-3.73426
Martes_pennanti	-3.73426
Eira_barbara	-3.73426
Melogale_orientalis	-3.73426
Neovison_vison	-3.73426
Mustela_frenata	-3.73426
Mustela_felipei	-3.73426
Mustela_erminea	-3.73426
Mustela_nivalis	-3.73426
Mustela_sibirica	-3.73426
Mustela_nigripes	-3.73426
Mustela_lutreolina	-3.73426
Mustela_putorius	-3.73426
Ictonyx_libyca	-3.4761
Galictis_vittata	-3.4095
Lyncodon_patagonicus	-3.17805
Galictis_cuja	-3.4761
Pteronura_brasiliensis	-3.4761
Lontra_longicaudis	-3.4761
Lontra_provocax	-3.4761
Lontra_canadensis	-3.73426
Enhydra_lutris	-3.66356
Lutra_maculicollis	-3.73426
Lutra_lutra	-3.73426
Aonyx_cinerea	-3.73426
Lutrogale_perspicillata	-3.73426
Aonyx_capensis	-3.73426
Ailurus_fulgens	-3.73426
Ursus_maritimus	-3.73426
Ursus_arctos	-3.24519
Melursus_ursinus	-3.4761
Ursus_thibetanus	-3.73426
Ursus_americanus	-3.73426
Helarctos_malayanus	-3.24519
Ailuropoda_melanoleuca	-3.62331
Nandinia_binotata	-3.96739
Hyaena_hyaena	-3.24519
Hyaena_brunnea	-3.17805
Proteles_cristata	-3.4761
Crocuta_crocuta	-3.4761
Eupleres_goudotii	-3.96739
Salanoia_concolor	-3.96739
Galidictis_fasciata	-3.73426
Galidia_elegans	-3.96739
Cryptoprocta_ferox	-3.96739
Herpestes_vitticollis	-3.96739
Herpestes_javanicus	-3.96739
Herpestes_edwardsii	-3.96739
Herpestes_ichneumon	-3.96739
Ichneumia_albicauda	-3.96739
Cynictis_penicillata	-3.96739
Bdeogale_crassicauda	-3.73426
Crossarchus_obscurus	-3.73426
Helogale_parvula	-3.96739
Liberiictis_kuhni	-3.96739
Mungos_mungo	-3.73426
Suricata_suricatta	-3.73426
Genetta_maculata	-3.96739
Genetta_tigrina	-3.96739
Genetta_genetta	-3.96739
Genetta_servalina	-3.96739
Viverricula_indica	-3.96739
Viverra_tangalunga	-3.96739
Viverra_zibetha	-3.96739
Civettictis_civetta	-3.73426
Macrogalidia_musschenbroekii	-4.04888
Cynogale_bennettii	-3.73426
Hemigalus_derbyanus	-3.96739
Paradoxurus_hermaphroditus	-3.96739
Arctictis_binturong	-3.96739
Prionodon_pardicolor	-4.04888
Prionodon_linsang	-4.04888
Neofelis_nebulosa	-3.96739
Panthera_tigris	-3.96739
Panthera_onca	-3.96739
Panthera_uncia	-3.96739
Panthera_pardus	-3.96739
Panthera_leo	-3.96739
Lynx_rufus	-3.96739
Lynx_lynx	-3.96739
Lynx_canadensis	-3.96739
Acinonyx_jubatus	-3.96739
Puma_concolor	-3.96739
Felis_catus	-3.96739
Felis_silvestris	-3.96739
Leopardus_pardalis	-3.96739
Leopardus_wiedii	-3.96739
Leopardus_tigrinus	-3.96739
Prionailurus_bengalensis	-3.96739
Leptailurus_serval	-3.96739
Caracal_caracal	-3.96739
Equus_africanus	-3.28757
Equus_grevyi	-3.4761
Equus_quagga	-3.4761
Equus_zebra	-3.4761
Equus_hemionus	-3.4761
Equus_caballus	-3.23143
Equus_ferus	-3.4761
Tapirus_indicus	-3.28757
Tapirus_terrestris	-3.28757
Tapirus_bairdii	-3.28757
Rhinoceros_unicornis	-2.69392
Rhinoceros_sondaicus	-2.69392
Dicerorhinus_sumatrensis	-2.69392
Diceros_bicornis	-2.63906
Ceratotherium_simum	-2.69392
Vicugna_pacos	-4.04888
Vicugna_vicugna	-4.04888
Lama_glama	-4.04888
Camelus_dromedarius	-3.98053
Camelus_ferus	-4.04888
Tayassu_pecari	-3.73426
Pecari_tajacu	-3.54715
Sus_scrofa	-3.81007
Sus_barbatus	-3.39348
Potamochoerus_porcus	-3.54715
Phacochoerus_africanus	-3.81007
Phacochoerus_aethiopicus	-3.62331
Hylochoerus_meinertzhageni	-3.54715
Babyrousa_babyrussa	-3.81007
Hippopotamus_amphibius	-3.24519
Choeropsis_liberiensis	-3.24519
Indopacetus_pacificus	-5.24175
Kogia_sima	-4.32972
Kogia_breviceps	-4.30406
Physeter_macrocephalus	-4.27287
Platanista_gangetica	-4.36945
Pontoporia_blainvillei	-4.07754
Inia_geoffrensis	-3.09453
Inia_araguaiaensis	-3.26853
Lipotes_vexillifer	-4.23411
Delphinapterus_leucas	-4.3922
Mesoplodon_bowdoini	-4.59512
Monodon_monoceros	-4.3922
Neophocaena_phocaenoides	-4.42623
Phocoenoides_dalli	-4.98401
Phocoena_phocoena	-4.66995
Phocoena_spinipinnis	-4.66479
Phocoena_dioptrica	-4.59512
Lagenorhynchus_acutus	-4.83363
Lagenorhynchus_albirostris	-5.02607
Orcinus_orca	-4.30406
Orcaella_brevirostris	-4.66995
Grampus_griseus	-4.86576
Pseudorca_crassidens	-4.59512
Peponocephala_electra	-4.66479
Globicephala_melas	-4.83844
Globicephala_macrorhynchus	-4.68297
Feresa_attenuata	-4.88532
Steno_bredanensis	-4.82028
Sotalia_guianensis	-4.59512
Sotalia_fluviatilis	-4.59512
Tursiops_truncatus	-4.66995
Stenella_attenuata	-4.93447
Lagenodelphis_hosei	-5.0955
Stenella_longirostris	-4.83363
Sousa_chinensis	-4.30406
Tursiops_aduncus	-4.66995
Stenella_frontalis	-4.72991
Stenella_coeruleoalba	-4.83363
Stenella_clymene	-4.72147
Delphinus_delphis	-5.00395
Delphinus_capensis	-4.95482
Lagenorhynchus_obscurus	-5.12534
Lagenorhynchus_obliquidens	-5.05077
Lagenorhynchus_cruciger	-5.12534
Lagenorhynchus_australis	-4.66995
Cephalorhynchus_hectori	-4.94639
Cephalorhynchus_heavisidii	-4.97779
Cephalorhynchus_eutropia	-4.80465
Cephalorhynchus_commersonii	-4.73957
Berardius_bairdii	-4.76373
Berardius_arnuxii	-4.77912
Mesoplodon_bidens	-4.59512
Ziphius_cavirostris	-4.59512
Mesoplodon_stejnegeri	-4.79763
Hyperoodon_planifrons	-4.70149
Hyperoodon_ampullatus	-4.70149
Mesoplodon_hectori	-4.4988
Mesoplodon_carlhubbsi	-4.69135
Mesoplodon_layardii	-4.59512
Mesoplodon_mirus	-4.59512
Mesoplodon_europaeus	-4.59512
Mesoplodon_densirostris	-4.59512
Mesoplodon_grayi	-4.69135
Tasmacetus_shepherdi	-4.59512
Eubalaena_glacialis	-4.43928
Eubalaena_japonica	-4.3512
Balaenoptera_physalus	-4.52541
Balaenoptera_musculus	-4.72991
Balaenoptera_omurai	-4.51424
Balaenoptera_borealis	-4.66995
Balaenoptera_edeni	-4.59512
Mesoplodon_perrini	-4.69135
Balaenoptera_bonaerensis	-4.68297
Mesoplodon_peruvianus	-4.59512
Lissodelphis_peronii	-5.42746
Lissodelphis_borealis	-5.38907
Balaena_mysticetus	-4.41078
Caperea_marginata	-2.81223
Balaenoptera_acutorostrata	-4.68297
Mesoplodon_ginkgodens	-4.69135
Megaptera_novaeangliae	-4.3512
Eschrichtius_robustus	-4.43928
Moschiola_meminna	-3.81007
Moschiola_indica	-3.81007
Tragulus_javanicus	-3.81007
Tragulus_kanchil	-3.81007
Tragulus_napu	-3.81007
Okapia_johnstoni	-3.54715
Giraffa_camelopardalis	-3.54715
Antilocapra_americana	-3.81007
Muntiacus_muntjak	-3.81007
Dama_dama	-3.81007
Elaphurus_davidianus	-3.81007
Rusa_unicolor	-3.81007
Cervus_elaphus	-3.81007
Axis_calamianensis	-3.81007
Axis_axis	-3.81007
Rangifer_tarandus	-3.54715
Odocoileus_virginianus	-3.81007
Odocoileus_hemionus	-3.81007
Mazama_gouazoubira	-3.81007
Blastocerus_dichotomus	-3.89182
Pudu_puda	-3.81007
Hydropotes_inermis	-3.89182
Capreolus_capreolus	-3.81007
Alces_alces	-3.81007
Moschus_moschiferus	-3.54715
Moschus_berezovskii	-3.81007
Boselaphus_tragocamelus	-3.81007
Tetracerus_quadricornis	-3.81007
Tragelaphus_imberbis	-3.81007
Tragelaphus_angasii	-3.81007
Tragelaphus_scriptus	-3.81007
Tragelaphus_eurycerus	-3.81007
Tragelaphus_spekii	-3.81007
Tragelaphus_buxtoni	-3.81007
Tragelaphus_strepsiceros	-3.81007
Syncerus_caffer	-3.81007
Bubalus_mindorensis	-3.81007
Bubalus_depressicornis	-3.96739
Bubalus_arnee	-3.81007
Bos_gaurus	-3.81007
Bos_taurus	-3.81007
Bos_indicus	-3.81007
Bison_bonasus	-3.54715
Bos_mutus	-3.54715
Bos_grunniens	-3.54715
Bison_bison	-3.54715
Nesotragus_moschatus	-3.81007
Aepyceros_melampus	-3.81007
Pelea_capreolus	-3.81007
Redunca_fulvorufula	-3.81007
Redunca_redunca	-3.81007
Redunca_arundinum	-3.81007
Kobus_megaceros	-3.81007
Kobus_leche	-3.81007
Kobus_vardonii	-3.81007
Kobus_kob	-3.81007
Kobus_ellipsiprymnus	-3.81007
Ourebia_ourebi	-3.81007
Raphicerus_melanotis	-3.81007
Raphicerus_sharpei	-3.81007
Raphicerus_campestris	-3.81007
Madoqua_kirkii	-3.81007
Madoqua_guentheri	-3.81007
Saiga_tatarica	-4.04888
Nanger_granti	-3.81007
Eudorcas_rufifrons	-3.81007
Gazella_dorcas	-3.81007
Gazella_gazella	-3.81007
Gazella_spekei	-3.81007
Antilope_cervicapra	-3.81007
Litocranius_walleri	-3.81007
Antidorcas_marsupialis	-3.81007
Neotragus_pygmaeus	-3.82137
Oreotragus_oreotragus	-3.81007
Philantomba_monticola	-3.54715
Sylvicapra_grimmia	-3.54715
Cephalophus_silvicultor	-3.54715
Cephalophus_dorsalis	-3.54715
Cephalophus_leucogaster	-3.54715
Cephalophus_nigrifrons	-3.54715
Cephalophus_natalensis	-3.54715
Cephalophus_weynsi	-3.54715
Ovibos_moschatus	-3.81007
Capricornis_crispus	-3.81007
Ovis_canadensis	-3.81007
Ovis_orientalis	-3.81007
Ovis_aries	-3.96739
Ovis_ammon	-3.81007
Capra_ibex	-3.81007
Capra_hircus	-3.81007
Pseudois_nayaur	-3.81007
Myotragus_balearicus	-3.89182
Oreamnos_americanus	-3.81007
Rupicapra_rupicapra	-3.81007
Ammotragus_lervia	-3.81007
Connochaetes_taurinus	-3.81007
Connochaetes_gnou	-3.73426
Damaliscus_pygargus	-3.81007
Damaliscus_lunatus	-3.81007
Beatragus_hunteri	-3.81007
Alcelaphus_buselaphus	-3.81007
Hippotragus_niger	-3.81007
Hippotragus_equinus	-3.73426
Oryx_dammah	-3.81007
Oryx_leucoryx	-3.81007
Oryx_gazella	-3.81007
Oryx_beisa	-3.81007
Rhinopoma_hardwickii	-3.4761
Rhinopoma_microphyllum	-3.89182
Lavia_frons	-3.4761
Megaderma_spasma	-3.39348
Rhinolophus_hipposideros	-3.89182
Asellia_tridens	-4.13735
Hipposideros_caffer	-3.89182
Hipposideros_diadema	-4.13735
Cynopterus_titthaecheilus	-3.54715
Cynopterus_brachyotis	-3.31678
Epomops_franqueti	-3.62331
Hypsignathus_monstrosus	-2.94444
Rousettus_aegyptiacus	-3.62331
Eidolon_helvum	-3.09453
Pteropus_giganteus	-3.62331
Pteropus_rufus	-3.70541
Pteropus_vampyrus	-3.62331
Macroglossus_minimus	-3.39348
Myzopoda_aurita	-3.62331
Mystacina_tuberculata	-3.62331
Thyroptera_discifera	-3.70541
Noctilio_leporinus	-3.98053
Pteronotus_parnellii	-3.62331
Mormoops_megalophylla	-3.81007
Micronycteris_microtis	-3.62331
Anoura_caudifer	-3.39348
Glossophaga_soricina	-3.70541
Glossophaga_morenoi	-3.70541
Phylloderma_stenops	-3.62331
Phyllostomus_discolor	-3.89182
Lonchorhina_inusitata	-3.89182
Chrotopterus_auritus	-3.89182
Vampyrum_spectrum	-3.89182
Lonchophylla_inexpectata	-3.4761
Carollia_perspicillata	-3.70541
Artibeus_jamaicensis	-3.62331
Artibeus_planirostris	-3.4761
Pygoderma_bilabiatum	-3.70541
Vampyressa_pusilla	-3.39348
Sturnira_erythromos	-3.4761
Sturnira_aratathomasi	-3.70541
Rhinophylla_pumilio	-3.56568
Lonchorhina_orinocensis	-3.89182
Lonchorhina_fernandezi	-3.89182
Lonchorhina_marinkellei	-3.89182
Lonchorhina_aurita	-3.89182
Diphylla_ecaudata	-3.70541
Desmodus_rotundus	-3.70541
Diaemus_youngi	-3.98053
Macrotus_waterhousii	-3.89182
Macrotus_californicus	-3.89182
Nyctinomops_macrotis	-3.81007
Molossus_molossus	-3.98053
Promops_nasutus	-3.81007
Molossops_temminckii	-3.81007
Cynomops_planirostris	-3.62331
Eumops_perotis	-3.81007
Tadarida_brasiliensis	-3.81007
Molossus_currentium	-3.98053
Myotis_daubentonii	-3.79447
Myotis_keaysi	-3.79447
Myotis_velifer	-3.79447
Myotis_chiloensis	-3.79447
Myotis_lucifugus	-3.56568
Myotis_evotis	-3.79447
Eptesicus_nilssonii	-3.79447
Eptesicus_serotinus	-3.79447
Histiotus_montanus	-3.79447
Histiotus_magellanicus	-3.4761
Eptesicus_diminutus	-3.79447
Lasionycteris_noctivagans	-3.79447
Pipistrellus_pipistrellus	-3.4761
Nyctalus_noctula	-3.79447
Vespertilio_murinus	-4.04888
Chalinolobus_tuberculatus	-3.79447
Neoromicia_nana	-3.79447
Lasiurus_cinereus	-3.79447
Lasiurus_ega	-3.79447
Antrozous_pallidus	-3.79447
Otonycteris_hemprichii	-3.98053
Plecotus_auritus	-3.79447
Euderma_maculatum	-3.79447
Barbastella_barbastellus	-3.79447
Miniopterus_schreibersii	-3.70541
Nycteris_javanica	-3.70541
Nycteris_thebaica	-3.56568
Saccopteryx_bilineata	-3.89182
Peropteryx_leucoptera	-3.81007
Balantiopteryx_plicata	-4.04888
Galeopterus_variegatus	-3.81007
Cynocephalus_volans	-3.81007
Nycticebus_coucang	-3.75537
Loris_tardigradus	-3.89182
Otolemur_garnettii	-3.73426
Otolemur_crassicaudatus	-3.96739
Galago_senegalensis	-3.81007
Euoticus_elegantulus	-3.81007
Perodicticus_potto	-3.59731
Arctocebus_calabarensis	-3.89182
Daubentonia_madagascariensis	-3.81007
Indri_indri	-4.30406
Propithecus_diadema	-4.18459
Propithecus_verreauxi	-4.18459
Propithecus_coquereli	-4.18459
Avahi_laniger	-4.30406
Varecia_variegata	-4.04888
Lemur_catta	-4.04888
Hapalemur_griseus	-4.04888
Eulemur_macaco	-4.04888
Eulemur_rubriventer	-4.04888
Eulemur_mongoz	-4.04888
Eulemur_collaris	-4.04888
Eulemur_fulvus	-4.04888
Eulemur_sanfordi	-4.04888
Eulemur_albifrons	-4.04888
Lepilemur_mustelinus	-4.30406
Cheirogaleus_medius	-3.73426
Microcebus_murinus	-3.96739
Microcebus_rufus	-3.96739
Tarsius_syrichta	-3.81007
Pithecia_irrorata	-3.81007
Pithecia_monachus	-3.81007
Pithecia_pithecia	-3.81007
Cacajao_melanocephalus	-3.81007
Callicebus_moloch	-3.81007
Leontocebus_nigricollis	-4.04888
Saguinus_oedipus	-4.04888
Leontopithecus_rosalia	-4.04888
Mico_humeralifer	-4.04888
Callithrix_jacchus	-3.81007
Cebuella_pygmaea	-3.81007
Saimiri_sciureus	-3.96739
Cebus_olivaceus	-3.54715
Cebus_albifrons	-3.73426
Cebus_capucinus	-3.81007
Aotus_azarae	-4.0279
Aotus_nancymaae	-4.0279
Alouatta_seniculus	-3.54715
Alouatta_caraya	-3.54715
Alouatta_palliata	-3.54715
Alouatta_pigra	-3.54715
Lagothrix_lagotricha	-3.31678
Brachyteles_hypoxanthus	-3.62331
Brachyteles_arachnoides	-3.31678
Ateles_geoffroyi	-3.31678
Ateles_fusciceps	-3.31678
Ateles_paniscus	-3.39348
Ateles_chamek	-3.31678
Ateles_belzebuth	-3.31678
Symphalangus_syndactylus	-3.62331
Hylobates_pileatus	-3.70541
Hylobates_lar	-3.62331
Hylobates_muelleri	-3.62331
Hylobates_moloch	-3.62331
Hylobates_klossii	-3.62331
Hylobates_agilis	-3.62331
Nomascus_concolor	-3.62331
Nomascus_gabriellae	-3.54715
Nomascus_leucogenys	-3.54715
Hoolock_hoolock	-3.62331
Pongo_pygmaeus	-3.4761
Pongo_abelii	-3.4761
Pan_troglodytes	-3.39348
Pan_paniscus	-3.39348
Homo_sapiens	-3.70541
Gorilla_gorilla	-3.39348
Gorilla_beringei	-3.09453
Semnopithecus_schistaceus	-4.04888
Trachypithecus_cristatus	-4.04888
Trachypithecus_phayrei	-4.04888
Semnopithecus_entellus	-4.04888
Presbytis_rubicunda	-4.04888
Presbytis_melalophos	-4.04888
Rhinopithecus_bieti	-4.04888
Rhinopithecus_roxellana	-4.04888
Nasalis_larvatus	-4.04888
Colobus_guereza	-4.04888
Colobus_vellerosus	-4.04888
Macaca_leonina	-4.04888
Macaca_sinica	-4.04888
Macaca_silenus	-4.04888
Macaca_nemestrina	-4.04888
Macaca_maura	-4.04888
Macaca_radiata	-4.04888
Macaca_fascicularis	-4.04888
Macaca_arctoides	-4.04888
Macaca_nigra	-4.04888
Macaca_fuscata	-4.04888
Macaca_mulatta	-4.04888
Macaca_sylvanus	-4.04888
Theropithecus_gelada	-3.81007
Papio_cynocephalus	-3.81007
Papio_papio	-3.81007
Papio_hamadryas	-3.81007
Papio_anubis	-3.81007
Lophocebus_aterrimus	-3.81007
Lophocebus_albigena	-3.81007
Cercocebus_atys	-4.04888
Mandrillus_sphinx	-4.04888
Mandrillus_leucophaeus	-4.04888
Cercopithecus_mitis	-4.04888
Cercopithecus_ascanius	-4.04888
Erythrocebus_patas	-4.04888
Chlorocebus_pygerythrus	-4.04888
Chlorocebus_aethiops	-4.04888
Chlorocebus_cynosuros	-4.04888
Chlorocebus_sabaeus	-4.04888
Miopithecus_talapoin	-3.81007
Ptilocercus_lowii	-3.54715
Tupaia_glis	-3.81007
Tupaia_nicobarica	-3.81007
Urogale_everetti	-3.81007
Tupaia_tana	-3.81007
Dendrogale_melanura	-3.81007
Anathana_ellioti	-3.81007
Sylvilagus_audubonii	-4.04888
Oryctolagus_cuniculus	-4.04888
Pentalagus_furnessi	-4.04888
Lepus_californicus	-4.04888
Lepus_alleni	-4.04888
Lepus_townsendii	-4.04888
Lepus_timidus	-4.04888
Lepus_europaeus	-4.04888
Lepus_americanus	-4.04888
Nesolagus_timminsi	-4.04888
Nesolagus_netscheri	-4.04888
Ochotona_hyperborea	-3.05505
Ochotona_princeps	-3.3468
Muscardinus_avellanarius	-3.81007
Aplodontia_rufa	-3.81007
Ratufa_indica	-3.81007
Callosciurus_erythraeus	-4.04888
Tamias_striatus	-4.04888
Tamias_minimus	-4.04888
Spermophilus_dauricus	-4.04888
Ictidomys_tridecemlineatus	-3.89182
Cynomys_ludovicianus	-4.04888
Marmota_monax	-4.04888
Marmota_caligata	-4.04888
Marmota_marmota	-4.04888
Marmota_sibirica	-4.04888
Sciurus_anomalus	-4.04888
Sciurus_niger	-4.04888
Sciurus_carolinensis	-4.04888
Sciurus_griseus	-4.04888
Microsciurus_mimulus	-4.04888
Microsciurus_alfari	-4.04888
Microsciurus_flaviventer	-4.04888
Sciurus_vulgaris	-4.04888
Tamiasciurus_hudsonicus	-4.04888
Glaucomys_volans	-4.04888
Petaurista_leucogenys	-4.04888
Petaurista_philippensis	-4.04888
Petaurista_alborufus	-4.04888
Petaurista_grandis	-4.04888
Laonastes_aenigmamus	-4.79763
Atherurus_macrourus	-3.24519
Hystrix_javanica	-3.54715
Hystrix_cristata	-3.54715
Thryonomys_swinderianus	-3.62331
Heterocephalus_glaber	-4.27287
Heliophobius_argenteocinereus	-3.89182
Cryptomys_hottentotus	-3.81007
Georychus_capensis	-4.04888
Bathyergus_suillus	-3.96739
Cuniculus_paca	-3.81007
Myoprocta_acouchy	-3.81007
Dasyprocta_leporina	-4.04888
Dasyprocta_azarae	-3.96739
Hydrochoerus_hydrochaeris	-3.81007
Dolichotis_patagonum	-4.04888
Cavia_porcellus	-3.81007
Cavia_aperea	-3.81007
Erethizon_dorsatum	-3.73426
Coendou_prehensilis	-3.66356
Lagostomus_maximus	-4.04888
Chinchilla_lanigera	-3.81007
Chinchilla_chinchilla	-3.81007
Phyllomys_sulinus	-3.73426
Myocastor_coypus	-3.81007
Capromys_pilorides	-3.75537
Ctenomys_boliviensis	-4.04888
Ctenomys_talarum	-4.04888
Octodon_degus	-4.04888
Spalacopus_cyanus	-3.96739
Dipus_sagitta	-4.04888
Jaculus_orientalis	-4.04888
Jaculus_jaculus	-4.04888
Stylodipus_telum	-4.04888
Allactaga_euphratica	-4.04888
Allactaga_major	-3.81007
Zapus_princeps	-3.81007
Sicista_concolor	-3.81007
Spalax_leucodon	-3.81007
Rhizomys_pruinosus	-3.4761
Dicrostonyx_groenlandicus	-3.81007
Ondatra_zibethicus	-3.81007
Lemmus_sibiricus	-3.81007
Synaptomys_cooperi	-3.81007
Ellobius_talpinus	-3.81007
Microtus_arvalis	-3.81007
Microtus_pennsylvanicus	-3.81007
Microtus_ochrogaster	-3.81007
Microtus_chrotorrhinus	-3.81007
Microtus_oeconomus	-3.81007
Myodes_gapperi	-3.81007
Mesocricetus_auratus	-3.81007
Tscherskia_triton	-3.81007
Cricetus_cricetus	-3.81007
Cricetulus_migratorius	-3.81007
Cricetulus_longicaudatus	-3.81007
Cricetulus_barabensis	-3.81007
Phodopus_sungorus	-3.81007
Neotoma_fuscipes	-3.81007
Neotoma_lepida	-3.81007
Neotoma_floridana	-3.81007
Neotoma_albigula	-3.81007
Neotoma_mexicana	-3.81007
Neotoma_cinerea	-3.81007
Hodomys_alleni	-3.81007
Nelsonia_neotomodon	-3.81007
Xenomys_nelsoni	-3.73426
Ochrotomys_nuttalli	-3.81007
Reithrodontomys_creper	-3.81007
Reithrodontomys_mexicanus	-3.81007
Reithrodontomys_fulvescens	-3.81007
Reithrodontomys_sumichrasti	-3.81007
Reithrodontomys_megalotis	-3.81007
Reithrodontomys_humulis	-3.81007
Reithrodontomys_montanus	-3.81007
Isthmomys_pirrensis	-3.81007
Isthmomys_flavidus	-3.81007
Onychomys_torridus	-3.81007
Onychomys_leucogaster	-3.81007
Peromyscus_maniculatus	-3.81007
Peromyscus_leucopus	-3.81007
Megadontomys_thomasi	-3.81007
Peromyscus_yucatanicus	-3.81007
Peromyscus_guatemalensis	-3.81007
Peromyscus_mexicanus	-3.81007
Peromyscus_megalops	-3.81007
Peromyscus_melanophrys	-3.81007
Habromys_lepturus	-3.96739
Habromys_lophurus	-3.96739
Peromyscus_crinitus	-3.81007
Peromyscus_ochraventer	-3.81007
Peromyscus_truei	-3.81007
Peromyscus_difficilis	-3.81007
Peromyscus_attwateri	-3.81007
Peromyscus_furvus	-3.81007
Peromyscus_spicilegus	-3.81007
Peromyscus_boylii	-3.81007
Podomys_floridanus	-3.81007
Neotomodon_alstoni	-3.81007
Peromyscus_californicus	-3.81007
Peromyscus_eremicus	-3.81007
Osgoodomys_banderanus	-3.81007
Scotinomys_xerampelinus	-3.81007
Scotinomys_teguina	-3.81007
Baiomys_taylori	-3.81007
Baiomys_musculus	-3.81007
Tylomys_panamensis	-3.73426
Tylomys_mirae	-3.73426
Tylomys_watsoni	-3.73426
Tylomys_fulviventer	-3.73426
Tylomys_nudicaudus	-3.73426
Ototylomys_phyllotis	-3.66356
Nyctomys_sumichrasti	-3.81007
Chibchanomys_trichotis	-3.54715
Reithrodon_auritus	-4.04888
Rheomys_underwoodi	-3.81007
Rheomys_thomasi	-3.81007
Rheomys_mexicanus	-3.81007
Rheomys_raptor	-3.81007
Ichthyomys_pittieri	-3.81007
Ichthyomys_hydrobates	-3.81007
Ichthyomys_tweedii	-3.81007
Neusticomys_venezuelae	-3.54715
Neusticomys_ferreirai	-3.81007
Neusticomys_monticolus	-3.81007
Anotomys_leander	-3.73426
Chinchillula_sahamae	-3.81007
Sigmodon_leucotis	-4.04888
Sigmodon_fulviventer	-4.04888
Sigmodon_alleni	-4.04888
Sigmodon_ochrognathus	-4.04888
Sigmodon_hispidus	-4.04888
Rhipidomys_macconnelli	-3.81007
Rhipidomys_nitela	-4.04888
Rhipidomys_mastacalis	-4.04888
Rhipidomys_fulviventer	-3.81007
Rhipidomys_venustus	-3.81007
Rhipidomys_couesi	-4.04888
Rhipidomys_venezuelae	-4.04888
Rhipidomys_latimanus	-3.81007
Rhipidomys_austrinus	-3.81007
Aepeomys_lugens	-3.81007
Thomasomys_gracilis	-3.81007
Thomasomys_cinereus	-3.81007
Thomasomys_rhoadsi	-3.81007
Thomasomys_baeops	-3.96739
Thomasomys_aureus	-3.81007
Thomasomys_pyrrhonotus	-3.96739
Thomasomys_daphne	-3.81007
Thomasomys_oreas	-3.81007
Thomasomys_hylophilus	-3.81007
Thomasomys_paramorum	-3.81007
Chilomys_instans	-3.81007
Akodon_bogotensis	-4.04888
Blarinomys_breviceps	-3.81007
Scapteromys_tumidus	-3.81007
Scapteromys_meridionalis	-3.81007
Scapteromys_aquaticus	-3.81007
Kunsia_tomentosus	-3.89182
Thalpomys_lasiotis	-3.81007
Necromys_amoenus	-3.81007
Necromys_urichi	-3.81007
Necromys_lasiurus	-4.04888
Necromys_temchuki	-3.81007
Necromys_obscurus	-3.81007
Necromys_lactens	-3.81007
Akodon_mimus	-3.81007
Akodon_azarae	-3.81007
Akodon_boliviensis	-3.81007
Akodon_subfuscus	-3.81007
Akodon_lutescens	-3.81007
Akodon_cursor	-3.81007
Akodon_simulator	-3.81007
Akodon_albiventer	-3.81007
Akodon_mollis	-3.81007
Akodon_torques	-3.81007
Akodon_aerosus	-3.81007
Deltamys_kempi	-3.81007
Thaptomys_nigrita	-3.81007
Oxymycterus_delator	-3.81007
Oxymycterus_paramensis	-3.81007
Oxymycterus_rufus	-3.81007
Oxymycterus_inca	-3.81007
Zygodontomys_brevicauda	-4.04888
Oecomys_concolor	-4.04888
Oecomys_roberti	-4.04888
Oecomys_bicolor	-4.04888
Oecomys_superans	-4.04888
Oecomys_trinitatis	-4.04888
Oecomys_mamorae	-4.04888
Oecomys_paricola	-4.04888
Transandinomys_talamancae	-4.04888
Transandinomys_bolivaris	-4.04888
Euryoryzomys_nitidus	-4.04888
Euryoryzomys_russatus	-4.04888
Euryoryzomys_legatus	-4.04888
Nephelomys_albigularis	-4.04888
Nephelomys_keaysi	-4.04888
Hylaeamys_megacephalus	-4.04888
Handleyomys_alfaroi	-4.04888
Handleyomys_melanotis	-4.04888
Handleyomys_chapmani	-4.04888
Neacomys_guianae	-4.04888
Neacomys_spinosus	-4.04888
Neacomys_tenuipes	-4.04888
Microryzomys_minutus	-4.04888
Microryzomys_altissimus	-4.04888
Oligoryzomys_microtis	-4.04888
Oligoryzomys_nigripes	-4.04888
Oligoryzomys_destructor	-4.04888
Oligoryzomys_fulvescens	-4.04888
Oligoryzomys_eliurus	-4.04888
Oligoryzomys_delticola	-4.04888
Oligoryzomys_chacoensis	-4.04888
Oligoryzomys_andinus	-4.04888
Oligoryzomys_magellanicus	-4.04888
Oligoryzomys_longicaudatus	-4.04888
Oligoryzomys_flavescens	-4.04888
Eremoryzomys_polius	-4.04888
Cerradomys_subflavus	-4.04888
Sooretamys_angouya	-4.04888
Holochilus_brasiliensis	-4.04888
Holochilus_chacarius	-4.04888
Pseudoryzomys_simplex	-4.04888
Lundomys_molitor	-4.04888
Nectomys_squamipes	-4.04888
Oryzomys_couesi	-4.04888
Oryzomys_palustris	-4.04888
Sigmodontomys_alfari	-4.04888
Melanomys_caliginosus	-4.04888
Nesoryzomys_indefessus	-3.81007
Irenomys_tarsalis	-3.81007
Euneomys_petersoni	-3.81007
Euneomys_chinchilloides	-3.81007
Andinomys_edax	-3.81007
Punomys_kofordi	-3.81007
Delomys_sublineatus	-3.81007
Delomys_dorsalis	-3.81007
Calomys_lepidus	-3.81007
Calomys_sorellus	-3.81007
Calomys_musculinus	-3.81007
Calomys_laucha	-3.81007
Calomys_tener	-4.04888
Calomys_boliviae	-4.04888
Calomys_callosus	-4.04888
Calomys_venustus	-4.04888
Calomys_hummelincki	-4.04888
Eligmodontia_morgani	-3.81007
Eligmodontia_puerulus	-3.81007
Eligmodontia_moreni	-4.04888
Eligmodontia_hirtipes	-4.04888
Eligmodontia_bolsonensis	-4.04888
Graomys_griseoflavus	-4.04888
Graomys_domorum	-4.04888
Andalgalomys_pearsoni	-3.81007
Andalgalomys_olrogi	-4.04888
Salinomys_delicatus	-4.04888
Phyllotis_wolffsohni	-3.81007
Tapecomys_primus	-3.81007
Auliscomys_sublimis	-3.81007
Auliscomys_pictus	-3.81007
Auliscomys_boliviensis	-3.81007
Galenomys_garleppi	-3.81007
Loxodontomys_micropus	-3.81007
Phyllotis_osilae	-3.81007
Phyllotis_alisosiensis	-3.81007
Phyllotis_anitae	-3.81007
Phyllotis_caprinus	-3.81007
Phyllotis_xanthopygus	-3.81007
Phyllotis_darwini	-3.81007
Phyllotis_amicus	-3.81007
Paralomys_gerbillus	-3.81007
Phyllotis_haggardi	-3.81007
Phyllotis_andium	-3.81007
Calassomys_apicalis	-4.04888
Akodon_neocenus	-3.81007
Wiedomys_pyrrhorhinos	-4.04888
Juliomys_pictipes	-3.81007
Abrothrix_olivaceus	-3.81007
Abrothrix_andinus	-3.81007
Abrothrix_jelskii	-3.81007
Abrothrix_illuteus	-3.81007
Abrothrix_longipilis	-3.81007
Abrothrix_sanborni	-3.81007
Notiomys_edwardsii	-3.81007
Geoxus_valdivianus	-3.81007
Chelemys_macronyx	-3.81007
Mystromys_albicaudatus	-3.81007
Saccostomus_campestris	-4.04888
Beamys_hindei	-3.81007
Cricetomys_gambianus	-3.81007
Brachytarsomys_albicauda	-3.96739
Gymnuromys_roberti	-3.96739
Eliurus_myoxinus	-3.96739
Brachyuromys_ramirohitra	-3.96739
Nesomys_rufus	-3.96739
Nesomys_audeberti	-3.96739
Macrotarsomys_bastardi	-3.96739
Calomyscus_baluchi	-3.81007
Lophiomys_imhausi	-3.75537
Pachyuromys_duprasi	-4.04888
Psammomys_obesus	-4.04888
Meriones_shawi	-4.04888
Meriones_unguiculatus	-4.04888
Sekeetamys_calurus	-4.04888
Ammodillus_imbellis	-4.04888
Microdillus_peeli	-4.04888
Gerbillus_cheesmani	-4.04888
Taterillus_arenarius	-4.04888
Gerbilliscus_nigricaudus	-4.04888
Gerbillurus_setzeri	-4.04888
Desmodillus_auricularis	-4.04888
Tatera_indica	-4.04888
Notomys_amplus	-4.04888
Conilurus_albipes	-3.96739
Hydromys_chrysogaster	-3.89182
Mastomys_coucha	-3.81007
Mus_musculus	-4.04888
Rhabdomys_pumilio	-4.04888
Micromys_minutus	-3.81007
Maxomys_inflatus	-3.81007
Rattus_rattus	-3.81007
Rattus_fuscipes	-3.81007
Rattus_norvegicus	-3.81007
Pedetes_surdaster	-4.04888
Pedetes_capensis	-4.04888
Anomalurus_pelii	-4.18459
Anomalurus_derbianus	-4.18459
Anomalurus_beecrofti	-4.01187
Anomalurus_pusillus	-4.07754
Microdipodops_pallidus	-4.04888
Dipodomys_spectabilis	-4.04888
Dipodomys_ordii	-4.04888
Dipodomys_heermanni	-4.04888
Dipodomys_merriami	-4.04888
Thomomys_bulbivorus	-4.04888
Thomomys_umbrinus	-4.04888
Thomomys_bottae	-4.04888
Geomys_pinetis	-4.04888
Geomys_bursarius	-4.04888
Geomys_arenarius	-3.81007
Cratogeomys_castanops	-3.89182
Liomys_salvini	-4.04888
Heteromys_anomalus	-4.04888
Perognathus_fasciatus	-4.04888
Castor_fiber	-3.54715
Castor_canadensis	-3.54715
Hydrodamalis_gigas	-2.81223
Trichechus_manatus	-2.37627
Trichechus_senegalensis	-2.37627
Trichechus_inunguis	-2.51231
Dugong_dugon	-2.69392
Loxodonta_africana	-2.63906
Elephas_maximus	-3.05505
Procavia_capensis	-3.61349
Heterohyrax_brucei	-3.4281
Dendrohyrax_validus	-3.51995
Dendrohyrax_dorsalis	-3.66356
Dendrohyrax_arboreus	-3.4281
Orycteropus_afer	-4.10328
Rhynchocyon_cirnei	-3.96739
Rhynchocyon_chrysopygus	-4.10328
Rhynchocyon_petersi	-4.10328
Elephantulus_myurus	-3.96739
Elephantulus_edwardii	-3.73426
Macroscelides_proboscideus	-3.73426
Petrodromus_tetradactylus	-3.96739
Elephantulus_rufescens	-3.96739
Elephantulus_brachyrhynchus	-3.73426
Elephantulus_intufi	-3.96739
Elephantulus_rupestris	-3.73426
Potamogale_velox	-3.3468
Limnogale_mergulus	-3.3468
Microgale_talazaci	-3.75537
Microgale_longicaudata	-3.53497
Microgale_cowani	-3.3468
Oryzorictes_tetradactylus	-3.3468
Tenrec_ecaudatus	-3.23143
Hemicentetes_semispinosus	-3.11482
Setifer_setosus	-3.75537
Echinops_telfairi	-3.17805
Eremitalpa_granti	-2.37627
Amblysomus_hottentotus	-2.69392
Calcochloris_obtusirostris	-2.69392
Chrysospalax_trevelyani	-2.69392
Chrysochloris_asiatica	-2.69392
Dasypus_hybridus	-3.99922
Dasypus_novemcinctus	-3.89182
Dasypus_kappleri	-3.99922
Dasypus_septemcinctus	-3.66356
Zaedyus_pichiy	-3.26853
Euphractus_sexcinctus	-3.26853
Chaetophractus_vellerosus	-3.26853
Chaetophractus_villosus	-3.26853
Chlamyphorus_truncatus	-3.26853
Tolypeutes_matacus	-3.26853
Priodontes_maximus	-3.56568
Cabassous_unicinctus	-3.17805
Tamandua_tetradactyla	-2.81223
Tamandua_mexicana	-2.81223
Myrmecophaga_tridactyla	-2.44235
Cyclopes_didactylus	-2.51231
Choloepus_hoffmanni	-2.48852
Choloepus_didactylus	-2.75154
Bradypus_tridactylus	-3.24519
Bradypus_variegatus	-3.24519
Rhyncholestes_raphanurus	-3.81007
Caenolestes_fuliginosus	-3.81007
Glironia_venusta	-3.81007
Monodelphis_domestica	-3.73426
Gracilinanus_microtarsus	-3.62331
Metachirus_nudicaudatus	-3.81007
Didelphis_virginiana	-3.81007
Didelphis_marsupialis	-3.81007
Didelphis_albiventris	-3.81007
Chironectes_minimus	-3.81007
Caluromys_philander	-3.81007
Dromiciops_gliroides	-3.62331
Notoryctes_typhlops	-3.23143
Notoryctes_caurinus	-3.39348
Macrotis_lagotis	-3.81007
Isoodon_macrourus	-3.81007
Isoodon_obesulus	-3.81007
Perameles_gunnii	-3.81007
Perameles_nasuta	-3.81007
Sarcophilus_harrisii	-3.81007
Dasyurus_maculatus	-3.81007
Dasyurus_viverrinus	-3.81007
Dasyuroides_byrnei	-3.81007
Dasycercus_cristicauda	-3.81007
Antechinus_flavipes	-3.81007
Thylacinus_cynocephalus	-3.81007
Myrmecobius_fasciatus	-3.81007
Phascolarctos_cinereus	-4.27287
Vombatus_ursinus	-3.24519
Lasiorhinus_latifrons	-3.24519
Cercartetus_concinnus	-3.81007
Trichosurus_vulpecula	-3.81007
Spilocuscus_maculatus	-3.81007
Phalanger_sericeus	-3.81007
Phalanger_orientalis	-3.81007
Hypsiprymnodon_moschatus	-3.81007
Thylogale_billardierii	-3.81007
Petrogale_lateralis	-3.81007
Petrogale_penicillata	-3.81007
Dendrolagus_goodfellowi	-3.81007
Dendrolagus_matschiei	-3.81007
Dendrolagus_bennettianus	-3.81007
Dendrolagus_lumholtzi	-3.81007
Macropus_fuliginosus	-3.81007
Macropus_giganteus	-3.81007
Macropus_antilopinus	-3.81007
Macropus_robustus	-3.81007
Macropus_rufus	-3.81007
Macropus_rufogriseus	-3.81007
Macropus_eugenii	-3.81007
Macropus_agilis	-3.81007
Macropus_parryi	-3.81007
Macropus_parma	-3.81007
Macropus_irma	-3.81007
Dendrolagus_ursinus	-3.81007
Potorous_longipes	-3.81007
Potorous_tridactylus	-3.81007
Bettongia_penicillata	-3.81007
Bettongia_gaimardi	-3.81007
Aepyprymnus_rufescens	-3.81007
Pseudocheirus_peregrinus	-3.81007
Petauroides_volans	-4.04888
Petaurus_australis	-3.81007
Petaurus_norfolcensis	-3.81007
Petaurus_breviceps	-3.81007
