# Supplementary material for: Divergent vertebral formulae shape the evolution of axial complexity in mammals
Source: Nat Ecol Evol. 2023 Mar 6;7(3):367–81. doi: 10.1038/s41559-023-01982-5 (PMC9998275; doi:10.1038/s41559-023-01982-5)
Supplement: Supplementary file 4 — Table 1: results of Poisson regressions; Table 2: phylogenetic ANOVAs; Table 3: ‘brunch’ and PGLS analyses; Table 4: robust linear regressions; and Table 5: skewness tests. [file 41559_2023_1982_MOESM4_ESM.xlsx]

## Sheet: Supplementary Table 1
Supplementary Table 1 | Poisson regression analyses. Results of generalized linear models for the differences in vertebral numbers between major mammal groups. The analyses are applied to the presacral, thoracolumbar, thoracic, and lumbar counts. Each regression model reports the significance for the intercept of each group and is followed by an analysis of deviance of predicted vs. observed grou…
POISSON REGRESSION ANALYSES FOR EACH OF THE PRESACRAL, THORACOLUMBAR, THORACIC, AND LUMBAR COUNTS VS. MAJOR TAXONOMIC GROUPS
Presacral (CTL) counts								Thoracolumbar (TL) counts								Thoracic (T) counts								Lumbar (L) counts
generalized linear model: CTL ~ group; family = "poisson"								generalized linear model: TL ~ group; family = "poisson"								generalized linear model: T ~ group; family = "poisson"								generalized linear model: L ~ group; family = "poisson"
	estimate	SE	z value	p-value					estimate	SE	z value	p-value					estimate	SE	z value	p-value					estimate	SE	z value	p-value
intercept Afrotheria	3.36641	0.029748	113.164	< 2e-16				intercept Afrotheria	3.09337	0.0341	90.715	< 2e-16				intercept Afrotheria	2.81802	0.03913	72.011	< 2e-16				intercept Afrotheria	1.66916	0.0695	24.015	< 2e-16
intercept Cetartiodactyla	-0.007901	0.032475	-0.243	0.807785				intercept Cetartiodactyla	-0.01393	0.03724	-0.374	0.708484				intercept Cetartiodactyla	-0.26895	0.04373	-6.15	7.76e-10				intercept Cetartiodactyla	0.52263	0.07332	7.128	1.02e-12
intercept Chiroptera	-0.180895	0.036737	-4.924	8.48e-07				intercept Chiroptera	-0.24964	0.04262	-5.857	4.72e-09				intercept Chiroptera	-0.33217	0.04967	-6.688	2.26e-11				intercept Chiroptera	-0.02657	0.08369	-0.317	0.75092
intercept Eulipotyphla	-0.086575	0.047213	-1.834	0.066696				intercept Eulipotyphla	-0.1193	0.05466	-2.183	0.029064				intercept Eulipotyphla	-0.18664	0.06405	-2.914	0.00357				intercept Eulipotyphla	0.06754	0.10545	0.641	0.52185
intercept Glires	-0.102271	0.031365	-3.261	0.001111				intercept Glires	-0.14067	0.03602	-3.905	9.42e-05				intercept Glires	-0.27619	0.04165	-6.631	3.33e-11				intercept Glires	0.19566	0.07233	2.705	0.00683
intercept Monotremata + Marsupialia	-0.106055	0.03807	-2.786	0.005339				intercept Monotremata + Marsupialia	-0.14584	0.04398	-3.316	0.000913				intercept Monotremata + Marsupialia	-0.2318	0.05137	-4.512	6.41e-06				intercept Monotremata + Marsupialia	0.08514	0.08588	0.991	0.32147
intercept Perissodactyla	0.039221	0.055654	0.705	0.48098				intercept Perissodactyla	0.0479	0.0636	0.753	0.451309				intercept Perissodactyla	0.09795	0.0717	1.366	0.17192				intercept Perissodactyla	-0.12871	0.13826	-0.931	0.35189
intercept Ferae	-0.070807	0.033436	-2.118	0.034199				intercept Ferae	-0.09795	0.03844	-2.548	0.01082				intercept Ferae	-0.18436	0.04453	-4.14	3.47e-05				intercept Ferae	0.13407	0.0766	1.75	0.08007
intercept Euarchonta	-0.108315	0.034499	-3.14	0.001692				intercept Euarchonta	-0.14893	0.03976	-3.746	0.00018				intercept Euarchonta	-0.27031	0.0464	-5.826	5.67e-09				intercept Euarchonta	0.15897	0.07814	2.034	0.04192
intercept Xenarthra	-0.186276	0.054442	-3.422	0.000623				intercept Xenarthra	-0.26606	0.0642	-4.144	3.41e-05				intercept Xenarthra	-0.21904	0.07245	-3.023	0.0025				intercept Xenarthra	-0.43078	0.13901	-3.099	0.00194
null deviance = 318.35; d.f. = 1135								null deviance = 418.07; d.f. = 1135								null deviance = 215.3; d.f. = 1135								null deviance = 914.06; d.f. = 1135
residual deviance = 237.77; d.f. = 1126								residual deviance = 307.38; d.f. = 1126								residual deviance = 124.7; d.f. = 1126								residual deviance = 651.74; d.f. = 1126
AIC = 6078.1								AIC = 5800.7								AIC = 5165								AIC = 4867
Analysis of deviance								Analysis of deviance								Analysis of deviance								Analysis of deviance
	LR Chisq	d.f.	p (> Chisq)						LR Chisq	d.f.	p (> Chisq)						LR Chisq	d.f.	p (> Chisq)						LR Chisq	d.f.	p (> Chisq)
group	80.582	9	1.238e-13					group	110.68	9	< 2.2e-16					group	90.62	9	1.223e-15					group	262.32	9	< 2.2e-16
pseudo-R^2 (McFadden) = 0.0131269								pseudo-R^2 (McFadden) = 0.0187872								pseudo-R^2 (McFadden) = 0.0173084								pseudo-R^2 (McFadden) = 0.0513423
pseudo-R^2 (Cox and Snell) = 0.0684774								pseudo-R^2 (Cox and Snell) = 0.0928357								pseudo-R^2 (Cox and Snell) = 0.0766723								pseudo-R^2 (Cox and Snell)= 0.206196
pseudo-R^2 (Nagelkerke) = 0.0687869								pseudo-R^2 (Nagelkerke) = 0.0933579								pseudo-R^2 (Nagelkerke) = 0.0774439								pseudo-R^2 (Nagelkerke) = 0.208518
	d.f. diff	LogLik.diff	Chisq	p-value					d.f. diff	LogLik.diff	Chisq	p-value					d.f. diff	LogLik.diff	Chisq	p-value					d.f. diff	LogLik.diff	Chisq	p-value
likelihood ratio test: CTL ~ group vs. CTL ~1	-9	-40.291	80.582	1.2383e-13				likelihood ratio test: TL ~ group vs. TL ~ 1	-9	-55.341	110.68	1.0678e-19				likelihood ratio test: T ~ group vs. T ~ 1	-9	-45.31	90.62	1.2225e-15				likelihood ratio test: L ~ group vs. L ~ 1	-9	-131.16	262.32	2.4863e-51
Post-hoc test results with Tukey-adjusted significance level								Post-hoc test results with Tukey-adjusted significance level								Post-hoc test results with Tukey-adjusted significance level								Post-hoc test results with Tukey-adjusted significance level
contrast	estimate	SE	z.ratio	p.value				contrast	estimate	SE	z.ratio	p.value				contrast	estimate	SE	z.ratio	p.value				contrast	estimate	SE	z.ratio	p.value
Afrotheria vs. Cetartiodactyla	0.0079	0.0325	0.243	1				Afrotheria vs. Cetartiodactyla	0.01393	0.0372	0.374	1				Afrotheria vs. Cetartiodactyla	0.26895	0.0437	6.15	<.0001				Afrotheria vs. Cetartiodactyla	-0.5226	0.0733	-7.128	< 0.0001
Afrotheria vs. Chiroptera	0.18089	0.0367	4.924	<.0001	✓			Afrotheria vs. Chiroptera	0.24964	0.0426	5.857	<.0001				Afrotheria vs. Chiroptera	0.33217	0.0497	6.688	<.0001	✓			Afrotheria vs. Chiroptera	0.0266	0.0837	0.317	1
Afrotheria vs. Eulipotyphla	0.08657	0.0472	1.834	0.7137				Afrotheria vs. Eulipotyphla	0.1193	0.0547	2.183	0.4688				Afrotheria vs. Eulipotyphla	0.18664	0.064	2.914	0.1016				Afrotheria vs. Eulipotyphla	-0.0675	0.1055	-0.641	0.9998
Afrotheria vs. Glires	0.10227	0.0314	3.261	0.0371	✓			Afrotheria vs. Glires	0.14067	0.036	3.905	0.0037				Afrotheria vs. Glires	0.27619	0.0417	6.631	<.0001	✓			Afrotheria vs. Glires	-0.1957	0.0723	-2.705	0.1713
Afrotheria vs. Monotremata + Marsupialia	0.10605	0.0381	2.786	0.1411				Afrotheria vs. Monotremata + Marsupialia	0.14584	0.044	3.316	0.0311				Afrotheria vs. Monotremata + Marsupialia	0.2318	0.0514	4.512	0.0003	✓			Afrotheria vs. Monotremata + Marsupialia	-0.0851	0.0859	-0.991	0.9928
Afrotheria vs. Perissodactyla	-0.03922	0.0557	-0.705	0.9995				Afrotheria vs. Perissodactyla	-0.0479	0.0636	-0.753	0.9991				Afrotheria vs. Perissodactyla	-0.09795	0.0717	-1.366	0.9375				Afrotheria vs. Perissodactyla	0.1287	0.1383	0.931	0.9955
Afrotheria vs. Ferae	0.07081	0.0334	2.118	0.5148				Afrotheria vs. Ferae	0.09795	0.0384	2.548	0.2427				Afrotheria vs. Ferae	0.18436	0.0445	4.14	0.0014				Afrotheria vs. Ferae	-0.1341	0.0766	-1.75	0.7664
Afrotheria vs. Euarchonta	0.10831	0.0345	3.14	0.0537				Afrotheria vs. Euarchonta	0.14893	0.0398	3.746	0.0069				Afrotheria vs. Euarchonta	0.27031	0.0464	5.826	<.0001	✓			Afrotheria vs. Euarchonta	-0.159	0.0781	-2.034	0.5745
Afrotheria vs. Xenarthra	0.18628	0.0544	3.422	0.022	✓			Afrotheria vs. Xenarthra	0.26606	0.0642	4.144	0.0014				Afrotheria vs. Xenarthra	0.21904	0.0724	3.023	0.0753				Afrotheria vs. Xenarthra	0.4308	0.139	3.099	0.0606
Cetartiodactyla vs. Chiroptera	0.17299	0.0252	6.868	<.0001	✓			Cetartiodactyla vs. Chiroptera	0.23571	0.0296	7.953	<.0001				Cetartiodactyla vs. Chiroptera	0.06322	0.0363	1.742	0.7712				Cetartiodactyla vs. Chiroptera	0.5492	0.0521	10.533	< 0.0001	✓
Cetartiodactyla vs. Eulipotyphla	0.07867	0.0389	2.022	0.5833				Cetartiodactyla vs. Eulipotyphla	0.10537	0.0453	2.328	0.3707				Cetartiodactyla vs. Eulipotyphla	-0.08231	0.0543	-1.515	0.8866				Cetartiodactyla vs. Eulipotyphla	0.4551	0.0827	5.505	< 0.0001
Cetartiodactyla vs. Glires	0.09437	0.0164	5.759	<.0001	✓			Cetartiodactyla vs. Glires	0.12674	0.019	6.688	<.0001				Cetartiodactyla vs. Glires	0.00724	0.0242	0.299	1				Cetartiodactyla vs. Glires	0.327	0.0307	10.635	< 0.0001	✓
Cetartiodactyla vs. Monotremata + Marsupialia	0.09815	0.0271	3.623	0.0109	✓			Cetartiodactyla vs. Monotremata + Marsupialia	0.13192	0.0316	4.18	0.0012				Cetartiodactyla vs. Monotremata + Marsupialia	-0.03715	0.0386	-0.963	0.9942				Cetartiodactyla vs. Monotremata + Marsupialia	0.4375	0.0556	7.871	< 0.0001	✓
Cetartiodactyla vs. Perissodactyla	-0.04712	0.0488	-0.965	0.9941				Cetartiodactyla vs. Perissodactyla	-0.06183	0.0557	-1.109	0.9839				Cetartiodactyla vs. Perissodactyla	-0.3669	0.0632	-5.808	<.0001				Cetartiodactyla vs. Perissodactyla	0.6513	0.1218	5.348	< 0.0001
Cetartiodactyla vs. Ferae	0.06291	0.0201	3.135	0.0545				Cetartiodactyla vs. Ferae	0.08403	0.0232	3.62	0.011				Cetartiodactyla vs. Ferae	-0.08459	0.0289	-2.931	0.0971				Cetartiodactyla vs. Ferae	0.3886	0.0398	9.772	< 0.0001	✓
Cetartiodactyla vs. Euarchonta	0.10041	0.0218	4.608	0.0002	✓			Cetartiodactyla vs. Euarchonta	0.13501	0.0253	5.328	<.0001				Cetartiodactyla vs. Euarchonta	0.00136	0.0317	0.043	1				Cetartiodactyla vs. Euarchonta	0.3637	0.0427	8.523	< 0.0001	✓
Cetartiodactyla vs. Xenarthra	0.17838	0.0474	3.762	0.0065	✓			Cetartiodactyla vs. Xenarthra	0.25213	0.0564	4.469	0.0003				Cetartiodactyla vs. Xenarthra	-0.04992	0.064	-0.78	0.9989				Cetartiodactyla vs. Xenarthra	0.9534	0.1226	7.775	< 0.0001	✓
Chiroptera vs. Eulipotyphla	-0.09432	0.0425	-2.218	0.4443				Chiroptera vs. Eulipotyphla	-0.13034	0.0498	-2.618	0.209				Chiroptera vs. Eulipotyphla	-0.14553	0.0592	-2.458	0.2916				Chiroptera vs. Eulipotyphla	-0.0941	0.092	-1.023	0.991
Chiroptera vs. Glires	-0.07862	0.0237	-3.312	0.0315	✓			Chiroptera vs. Glires	-0.10897	0.0281	-3.88	0.0041				Chiroptera vs. Glires	-0.05598	0.0337	-1.659	0.8186				Chiroptera vs. Glires	-0.2222	0.0507	-4.38	0.0005	✓
Chiroptera vs. Monotremata + Marsupialia	-0.07484	0.0321	-2.333	0.3673				Chiroptera vs. Monotremata + Marsupialia	-0.1038	0.0378	-2.749	0.1544				Chiroptera vs. Monotremata + Marsupialia	-0.10037	0.0452	-2.221	0.4423				Chiroptera vs. Monotremata + Marsupialia	-0.1117	0.0687	-1.626	0.8356
Chiroptera vs. Perissodactyla	-0.22012	0.0517	-4.254	0.0009	✓			Chiroptera vs. Perissodactyla	-0.29754	0.0595	-5.004	<.0001				Chiroptera vs. Perissodactyla	-0.43012	0.0674	-6.38	<.0001	✓			Chiroptera vs. Perissodactyla	0.1021	0.1283	0.796	0.9987
Chiroptera vs. Ferae	-0.11009	0.0264	-4.168	0.0013	✓			Chiroptera vs. Ferae	-0.15168	0.0311	-4.874	<.0001				Chiroptera vs. Ferae	-0.14781	0.0372	-3.969	0.0029	✓			Chiroptera vs. Ferae	-0.1606	0.0567	-2.835	0.1247
Chiroptera vs. Euarchonta	-0.07258	0.0277	-2.616	0.21				Chiroptera vs. Euarchonta	-0.10071	0.0327	-3.076	0.0647				Chiroptera vs. Euarchonta	-0.06187	0.0395	-1.568	0.8637				Chiroptera vs. Euarchonta	-0.1855	0.0587	-3.159	0.0507
Chiroptera vs. Xenarthra	0.00538	0.0504	0.107	1				Chiroptera vs. Xenarthra	0.01642	0.0601	0.273	1				Chiroptera vs. Xenarthra	-0.11314	0.0682	-1.659	0.8187				Chiroptera vs. Xenarthra	0.4042	0.1291	3.131	0.0551
Eulipotyphla vs. Glires	0.0157	0.038	0.413	1				Eulipotyphla vs. Glires	0.02137	0.0443	0.483	1				Eulipotyphla vs. Glires	0.08955	0.0527	1.7	0.7958				Eulipotyphla vs. Glires	-0.1281	0.0818	-1.566	0.8644
Eulipotyphla vs. Monotremata + Marsupialia	0.01948	0.0437	0.446	1				Eulipotyphla vs. Monotremata + Marsupialia	0.02654	0.051	0.521	1				Eulipotyphla vs. Monotremata + Marsupialia	0.04516	0.0606	0.745	0.9992				Eulipotyphla vs. Monotremata + Marsupialia	-0.0176	0.094	-0.187	1
Eulipotyphla vs. Perissodactyla	-0.1258	0.0596	-2.109	0.5207				Eulipotyphla vs. Perissodactyla	-0.1672	0.0686	-2.437	0.3035				Eulipotyphla vs. Perissodactyla	-0.28459	0.0786	-3.62	0.011				Eulipotyphla vs. Perissodactyla	0.1963	0.1434	1.368	0.9369
Eulipotyphla vs. Ferae	-0.01577	0.0397	-0.397	1				Eulipotyphla vs. Ferae	-0.02135	0.0463	-0.462	1				Eulipotyphla vs. Ferae	-0.00228	0.055	-0.041	1				Eulipotyphla vs. Ferae	-0.0665	0.0856	-0.777	0.9989
Eulipotyphla vs. Euarchonta	0.02174	0.0406	0.535	0.9999				Eulipotyphla vs. Euarchonta	0.02963	0.0474	0.626	0.9998				Eulipotyphla vs. Euarchonta	0.08367	0.0565	1.481	0.9				Eulipotyphla vs. Euarchonta	-0.0914	0.087	-1.051	0.989
Eulipotyphla vs. Xenarthra	0.0997	0.0585	1.704	0.7935				Eulipotyphla vs. Xenarthra	0.14676	0.0692	2.122	0.5117				Eulipotyphla vs. Xenarthra	0.0324	0.0793	0.409	1				Eulipotyphla vs. Xenarthra	0.4983	0.1442	3.457	0.0195
Glires vs. Monotremata + Marsupialia	0.00378	0.0258	0.147	1				Glires vs. Monotremata + Marsupialia	0.00517	0.0301	0.172	1				Glires vs. Monotremata + Marsupialia	-0.04439	0.0362	-1.226	0.9684				Glires vs. Monotremata + Marsupialia	0.1105	0.0543	2.037	0.5729
Glires vs. Perissodactyla	-0.14149	0.0481	-2.943	0.0939				Glires vs. Perissodactyla	-0.18857	0.0549	-3.433	0.0211				Glires vs. Perissodactyla	-0.37414	0.0618	-6.059	<.0001	✓			Glires vs. Perissodactyla	0.3244	0.1212	2.677	0.1831
Glires vs. Ferae	-0.03146	0.0182	-1.727	0.7801				Glires vs. Ferae	-0.04272	0.0212	-2.015	0.5884				Glires vs. Ferae	-0.09183	0.0256	-3.588	0.0124				Glires vs. Ferae	0.0616	0.0379	1.625	0.8361
Glires vs. Euarchonta	0.00604	0.0201	0.301	1				Glires vs. Euarchonta	0.00826	0.0235	0.351	1				Glires vs. Euarchonta	-0.00588	0.0287	-0.205	1				Glires vs. Euarchonta	0.0367	0.0409	0.896	0.9966
Glires vs. Xenarthra	0.08401	0.0467	1.8	0.7354				Glires vs. Xenarthra	0.12539	0.0556	2.254	0.4193				Glires vs. Xenarthra	-0.05715	0.0626	-0.913	0.9961				Glires vs. Xenarthra	0.6264	0.122	5.133	< .0001
Monotremata + Marsupialia vs. Perissodactyla	-0.14528	0.0527	-2.757	0.1514				Monotremata + Marsupialia vs. Perissodactyla	-0.19374	0.0604	-3.205	0.044				Monotremata + Marsupialia vs. Perissodactyla	-0.32975	0.0687	-4.801	0.0001	✓			Monotremata + Marsupialia vs. Perissodactyla	0.2139	0.1297	1.648	0.8241
Monotremata + Marsupialia vs. Ferae	-0.03525	0.0282	-1.248	0.9645				Monotremata + Marsupialia vs. Ferae	-0.04789	0.033	-1.453	0.9102				Monotremata + Marsupialia vs. Ferae	-0.04744	0.0395	-1.201	0.9723				Monotremata + Marsupialia vs. Ferae	-0.0489	0.0598	-0.818	0.9983
Monotremata + Marsupialia vs. Euarchonta	0.00226	0.0295	0.077	1				Monotremata + Marsupialia vs. Euarchonta	0.00309	0.0345	0.09	1				Monotremata + Marsupialia vs. Euarchonta	0.03851	0.0416	0.926	0.9957				Monotremata + Marsupialia vs. Euarchonta	-0.0738	0.0618	-1.194	0.9734
Monotremata + Marsupialia vs. Xenarthra	0.08022	0.0514	1.56	0.8672				Monotremata + Marsupialia vs. Xenarthra	0.12022	0.0611	1.968	0.6215				Monotremata + Marsupialia vs. Xenarthra	-0.01276	0.0695	-0.184	1				Monotremata + Marsupialia vs. Xenarthra	0.5159	0.1305	3.953	0.0031
Perissodactyla vs. Ferae	0.11003	0.0495	2.225	0.4393				Perissodactyla vs. Ferae	0.14586	0.0565	2.58	0.2271				Perissodactyla vs. Ferae	0.28232	0.0637	4.43	0.0004				Perissodactyla vs. Ferae	-0.2628	0.1238	-2.123	0.511
Perissodactyla vs. Euarchonta	0.14754	0.0502	2.94	0.0947				Perissodactyla vs. Euarchonta	0.19684	0.0574	3.427	0.0216				Perissodactyla vs. Euarchonta	0.36826	0.065	5.661	<.0001	✓			Perissodactyla vs. Euarchonta	-0.2877	0.1247	-2.306	0.3848
Perissodactyla vs. Xenarthra	0.2255	0.0655	3.442	0.0205	✓			Perissodactyla vs. Xenarthra	0.31396	0.0764	4.108	0.0016				Perissodactyla vs. Xenarthra	0.31699	0.0856	3.703	0.0081	✓			Perissodactyla vs. Xenarthra	0.3021	0.1696	1.781	0.7477
Ferae vs. Euarchonta	0.03751	0.0232	1.617	0.8404				Ferae vs. Euarchonta	0.05098	0.0271	1.884	0.6802				Ferae vs. Euarchonta	0.08594	0.0328	2.624	0.2062				Ferae vs. Euarchonta	-0.0249	0.0481	-0.518	1
Ferae vs. Xenarthra	0.11547	0.0481	2.401	0.3247				Ferae vs. Xenarthra	0.1681	0.0572	2.938	0.0952				Ferae vs. Xenarthra	0.03467	0.0646	0.537	0.9999				Ferae vs. Xenarthra	0.5648	0.1246	4.533	0.0002
Euarchonta vs. Xenarthra	0.07796	0.0488	1.597	0.8503				Euarchonta vs. Xenarthra	0.11713	0.0581	2.016	0.5878				Euarchonta vs. Xenarthra	-0.05127	0.0659	-0.778	0.9989				Euarchonta vs. Xenarthra	0.5898	0.1256	4.697	0.0001
✓ = significant pair-wise comparison in common with TL data																✓ = significant pair-wise comparison in common with TL data								✓ = significant pair-wise comparison in common with TL data

## Sheet: Supplementary Table 2
Supplementary Table 2 | Phylogenetic analyses of variance. Results of tests of differences in mean complexity index value between major groups. The analyses are applied to the Brillouin and evenness indices of the presacral and thoracolumbar regions and to the logit and untransformed thoracic:lumbar ratios. For each index, the analysis reports the ensemble level of significance followed by tabula…
PHYLOGENETIC ANALYSES OF VARIANCE FOR SIX COMPLEXITY INDICES
Throughout, X is the numerically encoded group variable (predictor) and Y is the vector of trait values (response); pairwise p-values are corrected for multiple comparisons through the false discovery rates method
Groups: 1 = Afrotheria, 2 = Cetartiodactyla, 3 = Chiroptera, 4 = Eulipotyphla, 5 = Glires, 6 = Monotremata + Marsupialia, 7 = Perissodactyla, 8 = Ferae, 9 = Euarchonta, 10 = Xenarthra
Brillouin index of CTL counts
Response:	Y
	Sum Sq	Mean Sq	F value	Pr(>F)
X	0.562318	0.06248	69.0889	0.728
Residual	1.01829	0.000904
Pairwise t-values
Group	Afrotheria	Cetartiodactyla	Chiroptera	Eulipotyphla	Glires	Monotremata + Marsupialia	Perissodactyla	Ferae	Euarchonta	Xenarthra
Afrotheria	0	-15.2903	-10.3672	-7.00718	-15.9435	-10.1694	2.86757	-11.3535	-13.225	1.53854
Cetartiodactyla	15.2903	0	5.35927	4.64319	-0.085606	4.49109	13.2437	6.07899	2.18902	13.2088
Chiroptera	10.3672	-5.35927	0	1.17767	-5.84992	-0.32171	10.2543	-0.286361	-3.12362	9.75515
Eulipotyphla	7.00718	-4.64319	-1.17767	0	-4.81802	-1.36719	8.14735	-1.43006	-3.29152	7.37378
Glires	15.9435	0.085606	5.84992	4.81802	0	4.836	13.4894	6.89819	2.48802	13.5261
Monotremata + Marsupialia	10.1694	-4.49109	0.32171	1.36719	-4.836	0	10.215	0.095977	-2.52997	9.69368
Perissodactyla	-2.86757	-13.2437	-10.2543	-8.14735	-13.4894	-10.215	0	-10.7366	-12.0621	-1.31187
Ferae	11.3535	-6.07899	0.286361	1.43006	-6.89819	-0.095977	10.7366	0	-3.30842	10.3345
Euarchonta	13.225	-2.18902	3.12362	3.29152	-2.48802	2.52997	12.0621	3.30842	0	11.826
Xenarthra	-1.53854	-13.2088	-9.75515	-7.37378	-13.5261	-9.69368	1.31187	-10.3345	-11.826	0
Pairwise corrected p-values
Group	Afrotheria	Cetartiodactyla	Chiroptera	Eulipotyphla	Glires	Monotremata + Marsupialia	Perissodactyla	Ferae	Euarchonta	Xenarthra
Afrotheria	1	0.27	0.362647	0.4175	0.2475	0.745714	0.975732	0.362647	0.27	0.975732
Cetartiodactyla	0.27	1	0.975732	0.928636	0.997	0.975732	0.225	0.975732	0.975732	0.2565
Chiroptera	0.362647	0.975732	1	0.975732	0.975732	0.997	0.2475	0.997	0.975732	0.362647
Eulipotyphla	0.4175	0.928636	0.975732	1	0.975732	0.975732	0.2565	0.975732	0.975732	0.362647
Glires	0.2475	0.997	0.975732	0.975732	1	0.975732	0.2475	0.975732	0.975732	0.2475
Monotremata + Marsupialia	0.745714	0.975732	0.997	0.975732	0.975732	1	0.499737	0.997	0.975732	0.6255
Perissodactyla	0.975732	0.225	0.2475	0.2565	0.2475	0.499737	1	0.2475	0.2565	0.975732
Ferae	0.362647	0.975732	0.997	0.975732	0.975732	0.997	0.2475	1	0.975732	0.362647
Euarchonta	0.27	0.975732	0.975732	0.975732	0.975732	0.975732	0.2565	0.975732	1	0.2565
Xenarthra	0.975732	0.2565	0.362647	0.362647	0.2475	0.6255	0.975732	0.362647	0.2565	1
Evenness index of CTL counts
Response:	Y
	Sum Sq	Mean Sq	F value	Pr(>F)
X	0.638651	0.070961	73.9227	0.703
Residual	1.08089	0.00096
Pairwise t-values
Group	Afrotheria	Cetartiodactyla	Chiroptera	Eulipotyphla	Glires	Monotremata + Marsupialia	Perissodactyla	Ferae	Euarchonta	Xenarthra
Afrotheria	0	-15.6842	-13.1236	-7.94754	-17.6763	-11.6649	3.23899	-12.2266	-14.8935	-0.548657
Cetartiodactyla	15.6842	0	1.73157	3.82868	-2.65898	2.83632	13.9229	5.25392	0.096089	11.0522
Chiroptera	13.1236	-1.73157	0	2.54558	-3.82362	1.09965	12.5551	2.53359	-1.5089	9.57446
Eulipotyphla	7.94754	-3.82868	-2.54558	0	-5.11537	-1.66765	9.22799	-1.05477	-3.64005	6.20866
Glires	17.6763	2.65898	3.82362	5.11537	0	4.76545	15.0244	8.33246	2.34542	12.2924
Monotremata + Marsupialia	11.6649	-2.83632	-1.09965	1.66765	-4.76545	0	11.6636	1.09242	-2.56553	8.61792
Perissodactyla	-3.23899	-13.9229	-12.5551	-9.22799	-15.0244	-11.6636	0	-11.732	-13.5947	-3.32286
Ferae	12.2266	-5.25392	-2.53359	1.05477	-8.33246	-1.09242	11.732	0	-4.5638	8.5726
Euarchonta	14.8935	-0.096089	1.5089	3.64005	-2.34542	2.56553	13.5947	4.5638	0	10.7113
Xenarthra	0.548657	-11.0522	-9.57446	-6.20866	-12.2924	-8.61792	3.32286	-8.5726	-10.7113	0
Pairwise corrected p-values
Group	Afrotheria	Cetartiodactyla	Chiroptera	Eulipotyphla	Glires	Monotremata + Marsupialia	Perissodactyla	Ferae	Euarchonta	Xenarthra
Afrotheria	1	0.302727	0.2925	0.366429	0.15	0.6975	0.918	0.436765	0.16875	0.954643
Cetartiodactyla	0.302727	1	0.954643	0.918	0.954643	0.954643	0.15	0.954643	0.996	0.369
Chiroptera	0.2925	0.954643	1	0.954643	0.954643	0.980795	0.15	0.954643	0.954643	0.366429
Eulipotyphla	0.366429	0.918	0.954643	1	0.918	0.954643	0.15	0.954643	0.954643	0.528158
Glires	0.15	0.954643	0.954643	0.918	1	0.954643	0.15	0.954643	0.954643	0.2925
Monotremata + Marsupialia	0.6975	0.954643	0.980795	0.954643	0.954643	1	0.436765	0.980795	0.954643	0.717857
Perissodactyla	0.918	0.15	0.15	0.15	0.15	0.436765	1	0.15	0.16875	0.918
Ferae	0.436765	0.954643	0.954643	0.954643	0.954643	0.980795	0.15	1	0.954643	0.528158
Euarchonta	0.16875	0.996	0.954643	0.954643	0.954643	0.954643	0.16875	0.954643	1	0.3375
Xenarthra	0.954643	0.369	0.366429	0.528158	0.2925	0.717857	0.918	0.528158	0.3375	1
Brillouin index of TL counts
Response:	Y
	Sum Sq	Mean Sq	F value	Pr(>F)
X	0.979333	0.108815	61.4977	0.787
Residual	1.99236	0.001769
Pairwise t-values
Group	Afrotheria	Cetartiodactyla	Chiroptera	Eulipotyphla	Glires	Monotremata + Marsupialia	Perissodactyla	Ferae	Euarchonta	Xenarthra
Afrotheria	0	-13.9836	-7.32132	-5.42131	-13.2596	-7.96512	2.43514	-9.32205	-10.7004	3.44053
Cetartiodactyla	13.9836	0	8.16881	5.45991	2.49178	6.02376	11.8991	7.35395	4.25918	14.4674
Chiroptera	7.32132	-8.16881	0	0.291128	-6.9898	-1.20434	7.68796	-1.96266	-4.00688	9.50536
Eulipotyphla	5.42131	-5.45991	-0.291128	0	-4.52117	-1.1448	6.50906	-1.57555	-2.95745	7.81878
Glires	13.2596	-2.49178	6.9898	4.52117	0	4.77396	11.2766	5.96493	2.60212	13.8409
Monotremata + Marsupialia	7.96512	-6.02376	1.20434	1.1448	-4.77396	0	8.20225	-0.454436	-2.39799	10.0095
Perissodactyla	-2.43514	-11.8991	-7.68796	-6.50906	-11.2766	-8.20225	0	-8.90625	-9.88739	0.604271
Ferae	9.32205	-7.35395	1.96266	1.57555	-5.96493	0.454436	8.90625	0	-2.47324	11.0094
Euarchonta	10.7004	-4.25918	4.00688	2.95745	-2.60212	2.39799	9.88739	2.47324	0	12.0773
Xenarthra	-3.44053	-14.4674	-9.50536	-7.81878	-13.8409	-10.0095	-0.604271	-11.0094	-12.0773	0
Pairwise corrected p-values
Group	Afrotheria	Cetartiodactyla	Chiroptera	Eulipotyphla	Glires	Monotremata + Marsupialia	Perissodactyla	Ferae	Euarchonta	Xenarthra
Afrotheria	1	0.4275	0.69075	0.69075	0.4275	0.838125	0.960698	0.69075	0.441	0.838125
Cetartiodactyla	0.4275	1	0.722045	0.69075	0.960698	0.960698	0.4275	0.908654	0.960698	0.4275
Chiroptera	0.69075	0.722045	1	0.975682	0.931667	0.960698	0.4275	0.960698	0.960698	0.437143
Eulipotyphla	0.69075	0.69075	0.975682	1	0.908654	0.960698	0.4275	0.960698	0.960698	0.437143
Glires	0.4275	0.960698	0.931667	0.908654	1	0.960698	0.4275	0.960698	0.960698	0.4275
Monotremata + Marsupialia	0.838125	0.960698	0.960698	0.960698	0.960698	1	0.722045	0.978	0.960698	0.69075
Perissodactyla	0.960698	0.4275	0.4275	0.4275	0.4275	0.722045	1	0.4275	0.4275	0.960698
Ferae	0.69075	0.908654	0.960698	0.960698	0.960698	0.978	0.4275	1	0.960698	0.4275
Euarchonta	0.441	0.960698	0.960698	0.960698	0.960698	0.960698	0.4275	0.960698	1	0.4275
Xenarthra	0.838125	0.4275	0.437143	0.437143	0.4275	0.69075	0.960698	0.4275	0.4275	1
Evenness index of TL counts
Response:	Y
	Sum Sq	Mean Sq	F value	Pr(>F)
X	2.63184	0.292427	64.8731	0.759
Residual	5.07565	0.004508
Pairwise t-values
Group	Afrotheria	Cetartiodactyla	Chiroptera	Eulipotyphla	Glires	Monotremata + Marsupialia	Perissodactyla	Ferae	Euarchonta	Xenarthra
Afrotheria	0	-14.6595	-9.22668	-6.17216	-14.7834	-9.15708	2.69382	-10.1633	-12.0723	2.21107
Cetartiodactyla	14.6595	0	6.21652	5.12283	0.894909	5.15659	12.6343	7.04878	3.08139	13.528
Chiroptera	9.22668	-6.21652	0	1.12143	-6.0551	-0.41912	9.28047	-0.334234	-3.17998	9.61753
Eulipotyphla	6.17216	-5.12283	-1.12143	0	-4.87901	-1.38279	7.33595	-1.40152	-3.27054	7.29908
Glires	14.7834	-0.894909	6.0551	4.87901	0	4.90012	12.5481	7.08697	2.64711	13.4828
Monotremata + Marsupialia	9.15708	-5.15659	0.41912	1.38279	-4.90012	0	9.31709	0.160518	-2.47756	9.62148
Perissodactyla	-2.69382	-12.6343	-9.28047	-7.33595	-12.5481	-9.31709	0	-9.75375	-11.0955	-0.615793
Ferae	10.1633	-7.04878	0.334234	1.40152	-7.08697	-0.160518	9.75375	0	-3.3207	10.2177
Euarchonta	12.0723	-3.08139	3.17998	3.27054	-2.64711	2.47756	11.0955	3.3207	0	11.7169
Xenarthra	-2.21107	-13.528	-9.61753	-7.29908	-13.4828	-9.62148	0.615793	-10.2177	-11.7169	0
Pairwise corrected p-values
Group	Afrotheria	Cetartiodactyla	Chiroptera	Eulipotyphla	Glires	Monotremata + Marsupialia	Perissodactyla	Ferae	Euarchonta	Xenarthra
Afrotheria	1	0.2745	0.489375	0.575	0.2745	0.844773	0.981346	0.553235	0.28875	0.993
Cetartiodactyla	0.2745	1	0.901875	0.762857	0.993	0.993	0.2745	0.9756	0.993	0.2745
Chiroptera	0.489375	0.901875	1	0.993	0.993	0.993	0.2745	0.993	0.993	0.408462
Eulipotyphla	0.575	0.762857	0.993	1	0.901875	0.993	0.2745	0.993	0.993	0.4275
Glires	0.2745	0.993	0.993	0.901875	1	0.993	0.2745	0.993	0.993	0.2745
Monotremata + Marsupialia	0.844773	0.993	0.993	0.993	0.993	1	0.667895	0.993	0.993	0.6795
Perissodactyla	0.981346	0.2745	0.2745	0.2745	0.2745	0.667895	1	0.2745	0.2745	0.993
Ferae	0.553235	0.9756	0.993	0.993	0.993	0.993	0.2745	1	0.993	0.468
Euarchonta	0.28875	0.993	0.993	0.993	0.993	0.993	0.2745	0.993	1	0.286364
Xenarthra	0.993	0.2745	0.408462	0.4275	0.2745	0.6795	0.993	0.468	0.286364	1
Logit T:L ratios
Response:	Y
	Sum Sq	Mean Sq	F value	Pr(>F)
X	45.8532	5.0948	55.5044	0.833
Residual	103.357	0.091791
Pairwise t-values
Group	Afrotheria	Cetartiodactyla	Chiroptera	Eulipotyphla	Glires	Monotremata + Marsupialia	Perissodactyla	Ferae	Euarchonta	Xenarthra
Afrotheria	0	14.5544	6.61858	4.35766	11.064	6.51008	-2.13132	7.37667	9.0954	-1.56494
Cetartiodactyla	-14.5544	0	-10.0174	-7.26252	-7.9163	-8.82476	-11.9268	-11.587	-7.738	-12.6911
Chiroptera	-6.61858	10.0174	0	-0.884248	4.99996	0.227606	-6.87374	0.356166	2.85753	-6.87546
Eulipotyphla	-4.35766	7.26252	0.884248	0	3.98256	1.01654	-5.39717	1.16493	2.81086	-5.15693
Glires	-11.064	7.9163	-4.99996	-3.98256	0	-4.19137	-9.52411	-5.73935	-1.87306	-9.98282
Monotremata + Marsupialia	-6.51008	8.82476	-0.227606	-1.01654	4.19137	0	-6.8541	0.072403	2.38585	-6.83268
Perissodactyla	2.13132	11.9268	6.87374	5.39717	9.52411	6.8541	0	7.27752	8.47271	0.635719
Ferae	-7.37667	11.587	-0.356166	-1.16493	5.73935	-0.072403	-7.27752	0	2.92203	-7.36994
Euarchonta	-9.0954	7.738	-2.85753	-2.81086	1.87306	-2.38585	-8.47271	-2.92203	0	-8.71234
Xenarthra	1.56494	12.6911	6.87546	5.15693	9.98282	6.83268	-0.635719	7.36994	8.71234	0
Pairwise corrected p-values
Group	Afrotheria	Cetartiodactyla	Chiroptera	Eulipotyphla	Glires	Monotremata + Marsupialia	Perissodactyla	Ferae	Euarchonta	Xenarthra
Afrotheria	1	0.675	0.805263	0.863571	0.675	0.981429	0.981429	0.863571	0.695769	0.981429
Cetartiodactyla	0.675	1	0.7525	0.6825	0.981429	0.981429	0.225	0.7525	0.981429	0.675
Chiroptera	0.805263	0.7525	1	0.981429	0.981429	0.999	0.675	0.999	0.981429	0.7525
Eulipotyphla	0.863571	0.6825	0.981429	1	0.981429	0.981429	0.675	0.981429	0.981429	0.7525
Glires	0.675	0.981429	0.981429	0.981429	1	0.981429	0.675	0.981429	0.981429	0.675
Monotremata + Marsupialia	0.981429	0.981429	0.999	0.981429	0.981429	1	0.867273	0.999	0.981429	0.874565
Perissodactyla	0.981429	0.225	0.675	0.675	0.675	0.867273	1	0.675	0.675	0.981429
Ferae	0.863571	0.7525	0.999	0.981429	0.981429	0.999	0.675	1	0.981429	0.7525
Euarchonta	0.695769	0.981429	0.981429	0.981429	0.981429	0.981429	0.675	0.981429	1	0.675
Xenarthra	0.981429	0.675	0.7525	0.7525	0.675	0.874565	0.981429	0.7525	0.675	1
Unstandardized T:L ratios
Response:	Y
	Sum Sq	Mean Sq	F value	Pr(>F)
X	329.289	36.5877	65.4188	0.76
Residual	629.755	0.559285
Pairwise t-values
Group	Afrotheria	Cetartiodactyla	Chiroptera	Eulipotyphla	Glires	Monotremata + Marsupialia	Perissodactyla	Ferae	Euarchonta	Xenarthra
Afrotheria	0	16.1505	10.4875	7.33516	15.1914	9.88952	-1.93937	11.4335	12.7763	-1.63596
Cetartiodactyla	-16.1505	0	-6.36115	-4.98588	-3.11702	-5.96665	-12.7512	-7.36589	-4.2429	-13.9647
Chiroptera	-10.4875	6.36115	0	-0.909369	4.57843	-0.170726	-9.32672	0.219781	2.36297	-9.95679
Eulipotyphla	-7.33516	4.98588	0.909369	0	3.75716	0.755058	-7.51989	1.10339	2.50915	-7.74278
Glires	-15.1914	3.11702	-4.57843	-3.75716	0	-4.30243	-11.9375	-5.40496	-2.05758	-13.0919
Monotremata + Marsupialia	-9.88952	5.96665	0.170726	-0.755058	4.30243	0	-9.0293	0.390575	2.35713	-9.57804
Perissodactyla	1.93937	12.7512	9.32672	7.51989	11.9375	9.0293	0	9.74545	10.7286	0.407792
Ferae	-11.4335	7.36589	-0.219781	-1.10339	5.40496	-0.390575	-9.74545	0	2.49927	-10.5077
Euarchonta	-12.7763	4.2429	-2.36297	-2.50915	2.05758	-2.35713	-10.7286	-2.49927	0	-11.5957
Xenarthra	1.63596	13.9647	9.95679	7.74278	13.0919	9.57804	-0.407792	10.5077	11.5957	0
Pairwise corrected p-values
Group	Afrotheria	Cetartiodactyla	Chiroptera	Eulipotyphla	Glires	Monotremata + Marsupialia	Perissodactyla	Ferae	Euarchonta	Xenarthra
Afrotheria	1	0.24	0.343929	0.378529	0.24	0.754773	0.975375	0.4175	0.24	0.975375
Cetartiodactyla	0.24	1	0.975375	0.754773	0.975375	0.975375	0.09	0.975375	0.975375	0.24
Chiroptera	0.343929	0.975375	1	0.975375	0.975375	0.99	0.24	0.99	0.975375	0.343929
Eulipotyphla	0.378529	0.754773	0.975375	1	0.975375	0.99	0.24	0.975375	0.975375	0.372
Glires	0.24	0.975375	0.975375	0.975375	1	0.975375	0.24	0.975375	0.975375	0.24
Monotremata + Marsupialia	0.754773	0.975375	0.99	0.99	0.975375	1	0.686842	0.99	0.975375	0.693
Perissodactyla	0.975375	0.09	0.24	0.24	0.24	0.686842	1	0.24	0.24	0.99
Ferae	0.4175	0.975375	0.99	0.975375	0.975375	0.99	0.24	1	0.975375	0.378529
Euarchonta	0.24	0.975375	0.975375	0.975375	0.975375	0.975375	0.24	0.975375	1	0.24
Xenarthra	0.975375	0.24	0.343929	0.372	0.24	0.693	0.99	0.378529	0.24	1

## Sheet: Supplementary Table 3
Supplementary Table 3 | Phylogenetic independent contrasts and phylogenetic generalized least squares analyses. Results of the correlations between thoracolumbar counts and thoracic:lumbar ratios, between each of the presacral and thoracolumbar counts and their respective Brillouin and evenness indices, and between thoracic:lumbar ratios and each of the Brillouin and evenness indices for the thor…
INDEPENDENT CONTRASTS ('BRUNCH' METHOD) CORRELATIONS BETWEEN THORACIC:LUMBAR RATIOS AND THORACOLUMBAR COUNTS, AS WELL AS BETWEEN EACH OF THE PRESACRAL AND THORACOLUMBAR COUNTS AND THEIR ASSOCIATED BRILLOUIN AND EVENNESS INDICES, WITH ACCOMPANYING DIAGNOSTICS PLOTS
TL counts vs. T:L ratios
brunch linear model equation	T/L = -0.023269(TL)
d.f.	287
Residual SE	0.2616
Multiple R^2	0.03102
Adjusted R^2	0.02764
F-statistic	9.188
p-value	0.002659
CTL counts vs. Brillouin index of CTL (HCTL)
brunch linear model equation	HCTL = -0.0002054(CTL)
d.f.	287
Residual SE	0.01108
Multiple R^2	0.001416
Adjusted R^2	-0.002063
F-statistic	0.407
p-value	0.524
CTL counts vs. evenness index of CTL (H'CTL)
brunch linear model equation	H'CTL = -0.0013919(CTL)
d.f.	287
Residual SE	0.01158
Multiple R^2	0.05631
Adjusted R^2	0.05302
F-statistic	17.13
p-value	4.603e-05
TL counts vs. Brillouin index of TL (HTL)
brunch linear model equation	HTL = 0.0015001(TL)
d.f.	287
Residual SE	0.01444
Multiple R^2	0.04186
Adjusted R^2	0.03852
F-statistic	12.54
p-value	0.0004652
TL counts vs. evenness index of TL (H'TL)
brunch linear model equation	H'TL = 0.0008541(TL)
d.f.	287
Residual SE	0.0235
Multiple R^2	0.005316
Adjusted R^2	0.001851
F-statistic	1.534
p-value	0.2165
PHYLOGENETIC GENERALIZED LEAST SQUARES CORRELATIONS BETWEEN THORACIC:LUMBAR RATIOS AND EACH OF THE BRILLOUIN AND EVENNESS INDICES FOR THE THORACOLUMBAR REGION, WITH ACCOMPANYING DIAGNOSTICS PLOTS
T:L ratios vs. Brillouin index of TL counts (HTL)
pgls linear model equation	HTL = -0.05200569(T/L) + 0.65646053
d.f.	1134
Residual SE	0.004058
Multiple R^2	0.8259
Adjusted R^2	0.8258
F-statistic	5380
p-value	< 2.2e-16
T:L ratios vs. evenness index of TL counts (H'TL)
pgls linear model equation	H'TL = -0.083499(T/L) + 1.077531
d.f.	1134
Residual SE	0.006908
Multiple R^2	0.8084
Adjusted R^2	0.8083
F-statistic	4786
p-value	< 2.2e-16

## Sheet: Supplementary Table 4
Supplementary Table 4 | Robust linear regression analyses. Results of robust linear models for the correlations between ancestral index values and descendant-ancestor index differences, and between node ages and ancestral index values. The analyses are applied to the Brillouin and evenness indices of the presacral and thoracolumbar regions and to the logit and untransformed thoracic:lumbar ratios…
ROBUST LINEAR REGRESSIONS OF ANCESTRAL VALUES OF SIX COMPLEXITY INDICES (X) VS. DESCENDANT MINUS ANCESTOR DIFFERENCES (Y) CORRECTED FOR THE REGRESSION TO THE MEAN
Complexity index					All taxa	Afrotheria	Cetartiodactyla	Chiroptera	Euarchonta	Eulipotyphla	Ferae	Glires	Monotremata	Perissodactyla	Xenarthra
													Marsupialia
Billouin index of CTL counts		robust linear model equation			Y = 0.0704X - 0.0634	Y = 0.0702X - 0.0623	Y = 0.0879X - 0.0794	Y = 0.1748X - 0.1567	Y = 0.0772X - 0.0696	Y = 0.1048X - 0.0933	Y = 0.0673X - 0.0603	Y = 0.0916X - 0.0832	Y = 0.1295X - 0.1170	Y = 0.1081X - 0.0935	Y = 0.1766X - 0.1544
		heteroscedasticity-robust Wald F-test
		F-statistic (slope)			1026.8	6.4098	147.23	15.396	169.42	1.4664	101.92	395.85	476.87	12.529	7.5905
		p-value (H0 = true slope is equal to 0)			< 2.2e-16	0.01344	< 2.2e-16	0.0001251	< 2.2e-16	0.2313	< 2.2e-16	< 2.2e-16	< 2.2e-16	0.001475	0.009049
		F-statisic (intercept)			1008.6	7.1277	142.88	15.372	165.89	1.4729	100.96	387.63	475.24	14.204	8.3621
		p-value (H0 = true intercept is equal to 0)			< 2.2e-16	0.009301	< 2.2e-16	0.0001266	< 2.2e-16	0.2303	< 2.2e-16	< 2.2e-16	< 2.2e-16	0.0008133	0.00638
Difference between increases (Y > 0) and absolute value of decreases |(Y < 0)I
	unpaired two-sample Wilcoxon rank sum two-sided test
		W			694644
		p-value (H0 = true location shift is equal to 0)			5.242e-14
		difference in location			0.000883065
		CI	0.000596855	0.001204
Difference between mean value of Y and null (overall mean = 0)
	one-sample Wilcoxon signed rank two-sided test
		V			1003148
		p-value (H0 = true mean is equal to 0)			< 2.2e-16
Difference between number of increases and number of decreases
	proportion two-sided test
		X-squared			215.24
		d.f.			1
		p-value (H0 = true proportion is equal to 0.5)			< 2.2e-16
		proportion estimate			0.654185
		CI	0.63415	0.673693
Evenness index of CTL counts		robust linear model equation			Y = 0.0701X - 0.0653	Y = 0.0781X - 0.0718	Y = 0.1015X - 0.0950	Y = 0.1441X - 0.1343	Y = 0.0807X - 0.0755	Y = 0.1020X - 0.0941	Y = 0.0675X - 0.0627	Y = 0.0876X - 0.0823	Y = 0.1188X - 0.1113	Y = 0.1068X - 0.0954	Y = 0.1551X - 0.1422
		heteroscedasticity-robust Wald F-test
		F-statistic (slope)			981.64	7.685	96.151	13.069	130.49	1.4232	115.67	406.22	510.55	9.4193	7.5095
		p-value (H0 = true slope is equal to 0)			< 2.2e-16	0.007019	< 2.2e-16	0.0003923	< 2.2e-16	0.2382	< 2.2e-16	< 2.2e-16	< 2.2e-16	0.004847	0.009392
		F-statisic (intercept)			963.92	8.6854	94.413	12.914	127.36	1.4282	115.26	396.17	507.43	10.845	8.2785
		p-value (H0 = true intercept is equal to 0)			< 2.2e-16	0.004273	< 2.2e-16	0.0004239	< 2.2e-16	0.2374	< 2.2e-16	< 2.2e-16	< 2.2e-16	0.002768	0.006624
Difference between increases (Y > 0) and absolute value of decreases |(Y < 0)I
	unpaired two-sample Wilcoxon rank sum two-sided test
		W			708579
		p-value (H0 = true location shift is equal to 0)			< 2.2e-16
		difference in location			0.00134404
		CI	0.000993446	0.00171719
Difference between mean value of Y and null (overall mean = 0)
	one-sample Wilcoxon signed rank two-sided test
		V			998520
		p-value (H0 = true mean is equal to 0)			< 2.2e-16
Difference between number of increases and number of decreases
	proportion two-sided test
		X-squared			245.82
		d.f.			1
		p-value (H0 = true proportion is equal to 0.5)			< 2.2e-16
		proportion estimate			0.664758
		CI	0.644851	0.684102
Billouin index of TL counts		robust linear model equation			Y = 0.0648X - 0.0343	Y = 0.0616X - 0.0314	Y = 0.0660X - 0.0352	Y = 0.1899X - 0.0987	Y = 0.0726X - 0.0387	Y = 0.1094X - 0.0567	Y = 0.0634X - 0.0332	Y = 0.0915X - 0.0494	Y = 0.1262X - 0.0672	Y = 0.1089X - 0.0528	Y = 0.1660X - 0.0810
		heteroscedasticity-robust Wald F-test
		F-statistic (slope)			1154.2	5.8761	270.04	17.99	166.12	1.3135	91.45	400.21	370.58	18.45	3.6791
		p-value (H0 = true slope is equal to 0)			< 2.2e-16	0.01776	< 2.2e-16	3.591e-05	< 2.2e-16	0.2569	< 2.2e-16	< 2.2e-16	< 2.2e-16	0.0002018	0.06284
		F-statisic (intercept)			1103.2	6.9501	242.6	18.122	159.68	1.3397	88.768	384.37	368.6	23.434	4.7599
		p-value (H0 = true intercept is equal to 0)			< 2.2e-16	0.01018	< 2.2e-16	3.373e-05	< 2.2e-16	0.2523	< 2.2e-16	< 2.2e-16	< 2.2e-16	4.671e-05	0.03556
Difference between increases (Y > 0) and absolute value of decreases |(Y < 0)I
	unpaired two-sample Wilcoxon rank sum two-sided test
		W			683201
		p-value (H0 = true location shift is equal to 0)			1.924e-09
		difference in location			0.000838644
		CI	0.000530821	0.00121986
Difference between mean value of Y and null (overall mean = 0)
	one-sample Wilcoxon signed rank two-sided test
		V			1016537
		p-value (H0 = true mean is equal to 0)			< 2.2e-16
Difference between number of increases and number of decreases
	proportion two-sided test
		X-squared			178.75
		d.f.			1
		p-value (H0 = true proportion is equal to 0.5)			< 2.2e-16
		proportion estimate			0.640529
		CI	0.620344	0.660233
Evenness index of TL counts		robust linear model equation			Y = 0.0678X - 0.0596	Y = 0.0642X - 0.0545	Y = 0.0742X - 0.0654	Y = 0.1700X - 0.1475	Y = 0.0767X - 0.0677	Y = 0.1065X - 0.0913	Y = 0.0662X - 0.0574	Y = 0.0897X - 0.0803	Y = 0.1305X - 0.1154	Y = 0.1097X - 0.0877	Y = 0.1572X - 0.1299
		heteroscedasticity-robust Wald F-test
		F-statistic (slope)			1138.9	6.3266	226.39	14.768	166.03	1.4207	94.88	404.06	471.29	16.477	4.428
		p-value (H0 = true slope is equal to 0)			< 2.2e-16	0.01403	< 2.2e-16	0.0001699	< 2.2e-16	0.2386	< 2.2e-16	< 2.2e-16	< 2.2e-16	0.0003784	0.04221
		F-statisic (intercept)			1088.8	7.7505	206.96	14.713	158.68	1.4435	92.995	386.01	468.45	21.503	5.7266
		p-value (H0 = true intercept is equal to 0)			< 2.2e-16	0.006793	< 2.2e-16	0.0001745	< 2.2e-16	0.2349	< 2.2e-16	< 2.2e-16	< 2.2e-16	8.077e-05	0.0219
Difference between increases (Y > 0) and absolute value of decreases |(Y < 0)I
	unpaired two-sample Wilcoxon rank sum two-sided test
		W			683415
		p-value (H0 = true location shift is equal to 0)			8.382e-11
		difference in location			0.00163157
		CI	0.00104825	0.00228418
Difference between mean value of Y and null (overall mean = 0)
	one-sample Wilcoxon signed rank two-sided test
		V			1000621
		p-value (H0 = true mean is equal to 0)			< 2.2e-16
Difference between number of increases and number of decreases
	proportion two-sided test
		X-squared			201.91
		d.f.			1
		p-value (H0 = true proportion is equal to 0.5)			< 2.2e-16
		proportion estimate			0.649339
		CI	0.629249	0.668919
Logit T:L ratios		robust linear model equation			Y = 0.0556X + 0.2118	Y = 0.0541X + 0.2011	Y = 0.0545X + 0.2101	Y = 0.1728X + 0.6478	Y = 0.0645X + 0.2470	Y = 0.0928X + 0.3487	Y = 0.0541X + 0.2038	Y = 0.0819X + 0.3162	Y = 0.1332X + 0.5065	Y = 0.0974X + 0.3419	Y = 0.1491X + 0.5368
		heteroscedasticity-robust Wald F-test
		F-statistic (slope)			886.41	3.2663	156.47	13.984	114.91	0.93229	82.598	349.79	907.53	12.691	3.687
		p-value (H0 = true slope is equal to 0)			< 2.2e-16	0.07473	< 2.2e-16	0.0002496	< 2.2e-16	0.3387	< 2.2e-16	< 2.2e-16	< 2.2e-16	0.001391	0.06257
		F-statisic (intercept)			862.4	3.9121	139.48	14.085	112.48	0.97603	82.293	341.13	914.38	15.568	4.4669
		p-value (H0 = true intercept is equal to 0)			< 2.2e-16	0.05161	< 2.2e-16	0.0002374	< 2.2e-16	0.3277	< 2.2e-16	< 2.2e-16	< 2.2e-16	0.0005109	0.04136
Difference between increases (Y > 0) and absolute value of decreases |(Y < 0)I
	unpaired two-sample Wilcoxon rank sum two-sided test
		W			701871
		p-value (H0 = true location shift is equal to 0)			0.0001466
		difference in location			0.00271274
		CI	0.00125626	0.00407695
Difference between mean value of Y and null (overall mean = 0)
	one-sample Wilcoxon signed rank two-sided test
		V			1409326
		p-value (H0 = true mean is equal to 0)			0.0001137
Difference between number of increases and number of decreases
	proportion two-sided test
		X-squared			5.0436
		d.f.			1
		p-value (H0 = true proportion is equal to 0.5)			0.02472
		proportion estimate			0.476212
		CI	0.455504	0.497
Unstandardized T:L ratios		robust linear model equation			Y = 0.0620X - 0.1441	Y = 0.0527X - 0.1580	Y = 0.0642X - 0.1468	Y = 0.1493X - 0.3594	Y = 0.0729X - 0.1661	Y = 0.0964X - 0.2448	Y = 0.0646X - 0.1551	Y = 0.0889X - 0.1920	Y = 0.1204X - 0.2720	Y = 0.1037X - 0.3113	Y = 0.2024X - 0.6116
		heteroscedasticity-robust Wald F-test
		F-statistic (slope)			1010.5	4.7512	191.28	12.504	143.04	1.3575	91.278	383.44	264.23	12.23	7.6216
		p-value (H0 = true slope is equal to 0)			< 2.2e-16	0.03242	< 2.2e-16	0.0005199	< 2.2e-16	0.2492	< 2.2e-16	< 2.2e-16	< 2.2e-16	0.001645	0.008921
		F-statisic (intercept)			1135.9	2.4338	275.32	12.763	160.96	1.3244	94.717	449.45	272.51	5.4102	4.0717
		p-value (H0 = true intercept is equal to 0)			< 2.2e-16	0.123	< 2.2e-16	0.0004569	< 2.2e-16	0.255	< 2.2e-16	< 2.2e-16	< 2.2e-16	0.02777	0.0509
Difference between increases (Y > 0) and absolute value of decreases |(Y < 0)I
	unpaired two-sample Wilcoxon rank sum two-sided test
		W			487239
		p-value (H0 = true location shift is equal to 0)			1.367e-09
		difference in location			-0.0138134
		CI	-0.0196412	-0.00864446
Difference between mean value of Y and null (overall mean = 0)
	one-sample Wilcoxon signed rank two-sided test
		V			1615992
		p-value (H0 = true mean is equal to 0)			< 2.2e-16
Difference between number of increases and number of decreases
	proportion two-sided test
		X-squared			236.69
		d.f.			1
		p-value (H0 = true proportion is equal to 0.5)			< 2.2e-16
		proportion estimate			0.338326
		CI	0.318933	0.358271
ROBUST LINEAR REGRESSIONS OF NODE AGES (X) VS. ANCESTRAL VALUES OF SIX COMPLEXITY INDICES (Y)
Complexity index					All taxa	Afrotheria	Cetartiodactyla	Chiroptera	Euarchonta	Eulipotyphla	Ferae	Glires	Monotremata	Perissodactyla	Xenarthra
													Marsupialia
Billouin index of CTL counts		robust linear model equation			Y = 0.0004X + 0.9136	Y = -0.0002X + 0.8400	Y = 0.0009X + 0.9219	Y = 0.0001X + 0.8998	Y = 0.0001X + 0.9117	Y = 0.0001X + 0.8941	Y = 0.0002X + 0.8981	Y = 0.0002X + 0.9190	Y = 0.0002X + 0.9093	Y = -0.0004X + 0.8125	Y = 0.0002X + 0.8377
		heteroscedasticity-robust Wald F-test
		F-statistic (slope)			209.62	0.30097	38.018	2.5624	2.554	8.5013	0.66513	35.655	958.86	0.28839	0.23639
		p-value (H0 = true slope is equal to 0)			< 2.2e-16	0.5849	1.69e-09	0.1112	0.1113	0.005191	0.4154	3.592e-09	< 2.2e-16	0.5957	0.6297
		F-statisic (intercept)			3207236	5451.2	440463	346648	270934	321826	250453	3300597	20406843	6042.8	3834.4
		p-value (H0 = true intercept is equal to 0)			< 2.2e-16	< 2.2e-16	< 2.2e-16	< 2.2e-16	< 2.2e-16	< 2.2e-16	< 2.2e-16	< 2.2e-16	< 2.2e-16	< 2.2e-16	< 2.2e-16
Evenness index of CTL counts		robust linear model equation			Y = 0.0003X + 0.9465	Y = -0.0003X + 0.8560	Y = 0.0006X + 0.9454	Y = 0.0002X + 0.9423	Y = 0.0002X + 0.9459	Y = 0.0001X + 0.9261	Y = 0.0001X + 0.9272	Y = 0.0002X + 0.9536	Y = 0.0003X + 0.9437	Y = -0.0006X + 0.8299	Y = 0.0005X + 0.8839
		heteroscedasticity-robust Wald F-test
		F-statistic (slope)			166.75	0.7524	87.265	9.5028	4.5681	4.4549	0.46649	48.489	956.95	0.66497	0.48544
		p-value (H0 = true slope is equal to 0)			< 2.2e-16	0.3885	< 2.2e-16	0.002384	0.03355	0.03954	0.4951	7.117e-12	< 2.2e-16	0.4219	0.4903
		F-statisic (intercept)			3191361	3956.9	2327683	386665	301473	191525	252523	3264990	19912206	6359.4	2205.8
		p-value (H0 = true intercept is equal to 0)			< 2.2e-16	< 2.2e-16	< 2.2e-16	< 2.2e-16	< 2.2e-16	< 2.2e-16	< 2.2e-16	< 2.2e-16	< 2.2e-16	< 2.2e-16	< 2.2e-16
Billouin index of TL counts		robust linear model equation			Y = 0.0005X + 0.5453	Y = 0.0001X + 0.4740	Y = 0.0017X + 0.5690	Y = 0.0001X + 0.5194	Y = 0.0002X + 0.5427	Y = 0.0001X + 0.5183	Y = 0.0002X + 0.5275	Y = 0.0002X + 0.5525	Y = 0.0003X + 0.5391	Y = -0.0002X + 0.4299	Y = -0.0001X + 0.4215
		heteroscedasticity-robust Wald F-test
		F-statistic (slope)			173.19	0.032128	41.443	0.62916	1.4165	1.9387	0.61057	25.125	936.09	0.058545	0.020711
		p-value (H0 = true slope is equal to 0)			< 2.2e-16	0.8582	3.422e-10	0.4287	0.2351	0.1696	0.4352	6.668e-07	< 2.2e-16	0.8106	0.8863
		F-statisic (intercept)			502533	1236.6	54602	55839	48485	32373	47563	647063	4003599	896.06	674.92
		p-value (H0 = true intercept is equal to 0)			< 2.2e-16	< 2.2e-16	< 2.2e-16	< 2.2e-16	< 2.2e-16	< 2.2e-16	< 2.2e-16	< 2.2e-16	< 2.2e-16	< 2.2e-16	< 2.2e-16
Evenness index of TL counts		robust linear model equation			Y = 0.0008X + 0.9063	Y = -0.0001X + 0.7668	Y = 0.0024X + 0.9330	Y = 0.0003X + 0.8746	Y = 0.0003X + 0.9009	Y = 0.0003X + 0.8610	Y = 0.0003X + 0.8700	Y = 0.0004X + 0.9181	Y = 0.0005X + 0.8959	Y = -0.0006X + 0.6978	Y = 0.0002X + 0.7210
		heteroscedasticity-robust Wald F-test
		F-statistic (slope)			201.39	0.022756	45.709	2.7633	2.0274	6.7174	0.49351	32.3	935.63	0.16537	0.022617
		p-value (H0 = true slope is equal to 0)			< 2.2e-16	0.8805	4.777e-11	0.09824	0.1557	0.01231	0.4829	1.874e-08	< 2.2e-16	0.6875	0.8813
		F-statisic (intercept)			599262	1079.1	83450	61729	49669	59582	47463	628070	3888586	913.96	521.28
		p-value (H0 = true intercept is equal to 0)			< 2.2e-16	< 2.2e-16	< 2.2e-16	< 2.2e-16	< 2.2e-16	< 2.2e-16	< 2.2e-16	< 2.2e-16	< 2.2e-16	< 2.2e-16	< 2.2e-16
Logit T:L ratios		robust linear model equation			Y = -0.0027X - 3.8726	Y = 0.0007X - 3.3877	Y = -0.0158X - 4.1904	Y = -0.0007X - 3.7523	Y = -0.0009X - 3.8636	Y = -0.0004X - 3.6957	Y = -0.0008X - 3.7453	Y = -0.0010X - 3.9169	Y = -0.0017X - 3.8196	Y = 0.0029X - 3.1612	Y = -0.0003X - 3.2513
		heteroscedasticity-robust Wald F-test
		F-statistic (slope)			131.51	0.10872	26.627	1.263	1.1705	0.68282	0.26032	11.096	822.72	0.3801	0.006548
		p-value (H0 = true slope is equal to 0)			< 2.2e-16	0.7425	3.865e-07	0.2626	0.2803	0.4123	0.6103	0.0009062	< 2.2e-16	0.5427	0.9359
		F-statisic (intercept)			639662	1883.5	23206	83412	55205	49060	66585	613612	6421479	1922.6	994.56
		p-value (H0 = true intercept is equal to 0)			< 2.2e-16	< 2.2e-16	< 2.2e-16	< 2.2e-16	< 2.2e-16	< 2.2e-16	< 2.2e-16	< 2.2e-16	< 2.2e-16	< 2.2e-16	< 2.2e-16
Unstandardized T:L ratios		robust linear model equation			Y = -0.0083X + 2.0404	Y = -0.0002X + 3.5143	Y = -0.0278X + 1.6441	Y = -0.0029X + 2.3056	Y = -0.0033X + 2.0919	Y = -0.0031X + 2.4344	Y = -0.0032X + 2.3576	Y = -0.0034X + 1.9532	Y = -0.0053X + 2.1359	Y = 0.0040X + 4.2435	Y = -0.0104X + 3.7339
		heteroscedasticity-robust Wald F-test
		F-statistic (slope)			263.88	0.00073876	39.389	4.4877	3.5488	5.2769	0.77454	35.626	1134.2	0.03255	0.50852
		p-value (H0 = true slope is equal to 0)			< 2.2e-16	0.9784	8.901e-10	0.03555	0.06075	0.02559	0.3795	3.645e-09	< 2.2e-16	0.8582	0.4803
		F-statisic (intercept)			40725	160.28	1701.6	6058.7	3784.7	3426.4	4630.8	40179	293631	160.42	93.19
		p-value (H0 = true intercept is equal to 0)			< 2.2e-16	< 2.2e-16	< 2.2e-16	< 2.2e-16	< 2.2e-16	< 2.2e-16	< 2.2e-16	< 2.2e-16	< 2.2e-16	7.142e-13	1.189e-11

## Sheet: Supplementary Table 5
Supplementary Table 5 | Analyses of skewness. Results of analyses of skewness (subclade tests) for the entire species sample used in this study, with species allocated to ten major groups. The tests are applied to the Brillouin and evenness indices of the presacral and thoracolumbar regions and to the unstandardized thoracic:lumbar ratio. Each test reports the percentage contributions of three co…
ANALYSES OF SKEWNESS APPLIED TO FIVE COMPLEXITY INDICES
Billouin index of CTL counts
source	SC	%	df
SCB	0.057	0.219	8
SCH	0.134	0.516	10
SCW	0.06889	0.265	1116
SCT	0.2599
Evenness index of CTL counts
source	SC	%	df
SCB	0.06593	0.234	8
SCH	0.1465	0.52	10
SCW	0.06943	0.246	1116
SCT	0.2819
Brillouin index of TL counts
source	SC	%	df
SCB	0.7642	0.19	8
SCH	1.966	0.49	10
SCW	1.286	0.32	1116
SCT	4.017
Evenness index of TL counts
source	SC	%	df
SCB	0.7918	0.19	8
SCH	2.13	0.511	10
SCW	1.246	0.299	1116
SCT	4.167
Unstandardized T:L ratios
source	SC	%	df
SCB	461.3	0.171	8
SCH	1367	0.506	10
SCW	872	0.323	1116
SCT	2701
SC = skewness (sum of cubes)
SCB = between-group skewness
SCH = skewness due to heteroscedasticity
SCW = within-group skewness
SCT = total skewness
